# Supplementary material for: CD14 and Complement Crosstalk and Largely Mediate the Transcriptional Response to Escherichia coli in Human Whole Blood as Revealed by DNA Microarray
Source: PLoS One. 2015 Feb 23;10(2):e0117261. doi: 10.1371/journal.pone.0117261 (PMC4338229; doi:10.1371/journal.pone.0117261)
Supplement: S2 File — (XLSX) [file pone.0117261.s008.xlsx]

## Sheet: IAE - II
Transcript.ID	Gene.Symbol	gene_assignment
7897803	PLOD1	NM_000302 // PLOD1 // procollagen-lysine 1. 2-oxoglutarate 5-dioxygenase 1 // 1p
7899244	PIGV	NM_017837 // PIGV // phosphatidylinositol glycan anchor biosynthesis. class V //
7902512	DNAJB4	NM_007034 // DNAJB4 // DnaJ (Hsp40) homolog. subfamily B. member 4 // 1p31.1 //
7905444	SNX27	NM_030918 // SNX27 // sorting nexin family member 27 // 1q21.3 // 81609 /// ENST
7907830	QSOX1	NM_002826 // QSOX1 // quiescin Q6 sulfhydryl oxidase 1 // 1q24 // 5768 /// NM_00
7908388	RGS1	NM_002922 // RGS1 // regulator of G-protein signaling 1 // 1q31 // 5996 /// ENST
7909610	ATF3	NM_001040619 // ATF3 // activating transcription factor 3 // 1q32.3 // 467 /// N
7915392	HIVEP3	NM_024503 // HIVEP3 // human immunodeficiency virus type I enhancer binding prot
7915504	ELOVL1	NM_022821 // ELOVL1 // elongation of very long chain fatty acids (FEN1/Elo2. SUR
7916112	RAB3B	NM_002867 // RAB3B // RAB3B. member RAS oncogene family // 1p32-p31 // 5865 ///
7918622	SLC16A1	NM_003051 // SLC16A1 // solute carrier family 16. member 1 (monocarboxylic acid
7921752	ARHGAP30	NM_001025598 // ARHGAP30 // Rho GTPase activating protein 30 // 1q23.3 // 257106
7924499	TLR5	NM_003268 // TLR5 // toll-like receptor 5 // 1q41-q42 // 7100 /// ENST0000036688
7926677	OTUD1	NM_001145373 // OTUD1 // OTU domain containing 1 // 10p12.2 // 220213 /// ENST00
7926807	PDSS1	NM_014317 // PDSS1 // prenyl (decaprenyl) diphosphate synthase. subunit 1 // 10p
7930577	CASP7	NM_033338 // CASP7 // caspase 7. apoptosis-related cysteine peptidase // 10q25 /
7930882	FAM45A	NM_207009 // FAM45A // family with sequence similarity 45. member A // 10q25 //
7932862	NA	---
7938390	ADM	NM_001124 // ADM // adrenomedullin // 11p15.4 // 133 /// ENST00000278175 // ADM
7943795	C11orf52	NM_080659 // C11orf52 // chromosome 11 open reading frame 52 // 11q23.1 // 91894
7944418	C2CD2L	NM_014807 // C2CD2L // C2CD2-like // 11q23.3 // 9854 /// ENST00000336702 // C2CD
7944931	SLC37A2	NM_198277 // SLC37A2 // solute carrier family 37 (glycerol-3-phosphate transport
7945132	FLI1	NM_002017 // FLI1 // Friend leukemia virus integration 1 // 11q24.1-q24.3 // 231
7948274	UBE2L6	NM_004223 // UBE2L6 // ubiquitin-conjugating enzyme E2L 6 // 11q12 // 9246 /// N
7950409	KCNE3	NM_005472 // KCNE3 // potassium voltage-gated channel. Isk-related family. membe
7956826	TBC1D30	AB449914 // TBC1D30 // TBC1 domain family. member 30 // 12q14.3 // 23329 /// AK2
7956894	HELB	NM_033647 // HELB // helicase (DNA) B // 12q14.3 // 92797 /// ENST00000247815 //
7957850	GAS2L3	NM_174942 // GAS2L3 // growth arrest-specific 2 like 3 // 12q23.1 // 283431 ///
7959251	P2RX7	NM_002562 // P2RX7 // purinergic receptor P2X. ligand-gated ion channel. 7 // 12
7961075	CD69	NM_001781 // CD69 // CD69 molecule // 12p13-p12 // 969 /// NR_026671 // CD69 //
7961142	OLR1	NM_002543 // OLR1 // oxidized low density lipoprotein (lectin-like) receptor 1 /
7962183	AK3L1	NM_001005353 // AK3L1 // adenylate kinase 3-like 1 // 1p31.3 // 205 /// NM_01341
7964436	ARHGAP9	NM_032496 // ARHGAP9 // Rho GTPase activating protein 9 // 12q14 // 64333 /// NM
7977018	TRAF3	NM_145725 // TRAF3 // TNF receptor-associated factor 3 // 14q32.32 // 7187 /// N
7980005	NUMB	NM_001005743 // NUMB // numb homolog (Drosophila) // 14q24.3 // 8650 /// NM_0010
7983910	AQP9	NM_020980 // AQP9 // aquaporin 9 // 15q22.1-q22.2 // 366 /// ENST00000219919 //
7983940	FAM63B	NM_001040450 // FAM63B // family with sequence similarity 63. member B // 15q21.
7991143	SEC11A	NM_014300 // SEC11A // SEC11 homolog A (S. cerevisiae) // 15q25.3 // 23478 /// E
7995040	BCKDK	NM_001122957 // BCKDK // branched chain ketoacid dehydrogenase kinase // 16p11.2
7997712	IRF8	NM_002163 // IRF8 // interferon regulatory factor 8 // 16q24.1 // 3394 /// ENST0
7999423	SOCS1	NM_003745 // SOCS1 // suppressor of cytokine signaling 1 // 16p13.13 // 8651 ///
8000856	TBC1D10B	NM_015527 // TBC1D10B // TBC1 domain family. member 10B // 16p11.2 // 26000 ///
8001149	VPS35	NM_018206 // VPS35 // vacuolar protein sorting 35 homolog (S. cerevisiae) // 16q
8003484	C16orf7	NM_004913 // C16orf7 // chromosome 16 open reading frame 7 // 16q24 // 9605 ///
8004694	CYB5D1	NM_144607 // CYB5D1 // cytochrome b5 domain containing 1 // 17p13.1 // 124637 //
8006433	CCL2	NM_002982 // CCL2 // chemokine (C-C motif) ligand 2 // 17q11.2-q12 // 6347 /// E
8006820	LASP1	NM_006148 // LASP1 // LIM and SH3 protein 1 // 17q11-q21.3 // 3927 /// ENST00000
8007675	ADAM11	NM_002390 // ADAM11 // ADAM metallopeptidase domain 11 // 17q21.3 // 4185 /// EN
8009568	TTYH2	NM_032646 // TTYH2 // tweety homolog 2 (Drosophila) // 17q25.1 // 94015 /// NM_0
8014391	CCL3L1	NM_021006 // CCL3L1 // chemokine (C-C motif) ligand 3-like 1 // 17q21.1 // 6349
8014414	CCL3L1	NM_021006 // CCL3L1 // chemokine (C-C motif) ligand 3-like 1 // 17q21.1 // 6349
8019731	CCL3L1	NM_021006 // CCL3L1 // chemokine (C-C motif) ligand 3-like 1 // 17q21.1 // 6349
8021470	PMAIP1	NM_021127 // PMAIP1 // phorbol-12-myristate-13-acetate-induced protein 1 // 18q2
8022251	PPP4R1	NM_001042388 // PPP4R1 // protein phosphatase 4. regulatory subunit 1 // 18p11.2
8023481	NARS	NM_004539 // NARS // asparaginyl-tRNA synthetase // 18q21.2-q21.3 // 4677 /// EN
8024792	EBI3	NM_005755 // EBI3 // Epstein-Barr virus induced 3 // 19p13.3 // 10148 /// ENST00
8026806	GLT25D1	NM_024656 // GLT25D1 // glycosyltransferase 25 domain containing 1 // 19p13.11 /
8030804	CD33	NM_001772 // CD33 // CD33 molecule // 19q13.3 // 945 /// NM_001082618 // CD33 //
8034873	EMR2	NM_013447 // EMR2 // egf-like module containing. mucin-like. hormone receptor-li
8037144	DEDD2	NM_133328 // DEDD2 // death effector domain containing 2 // 19q13.2 // 162989 //
8039109	VSTM1	NM_198481 // VSTM1 // V-set and transmembrane domain containing 1 // 19q13.42 //
8041422	RASGRP3	NM_170672 // RASGRP3 // RAS guanyl releasing protein 3 (calcium and DAG-regulate
8042917	DOK1	NM_001381 // DOK1 // docking protein 1. 62kDa (downstream of tyrosine kinase 1)
8044008	IL1RL2	NM_003854 // IL1RL2 // interleukin 1 receptor-like 2 // 2q12 // 8808 /// ENST000
8044499	SLC20A1	NM_005415 // SLC20A1 // solute carrier family 20 (phosphate transporter). member
8049722	GPR35	NM_005301 // GPR35 // G protein-coupled receptor 35 // 2q37.3 // 2859 /// ENST00
8050190	ADAM17	NM_003183 // ADAM17 // ADAM metallopeptidase domain 17 // 2p25 // 6868 /// ENST0
8052826	SNORA36C	NR_003705 // SNORA36C // small nucleolar RNA. H/ACA box 36C (retrotransposed) //
8061247	RIN2	NM_018993 // RIN2 // Ras and Rab interactor 2 // 20p11.22 // 54453 /// ENST00000
8063524	NA	---
8064978	JAG1	NM_000214 // JAG1 // jagged 1 (Alagille syndrome) // 20p12.1-p11.23 // 182 /// E
8066513	SDC4	NM_002999 // SDC4 // syndecan 4 // 20q12 // 6385 /// ENST00000372733 // SDC4 //
8067802	RGS19	NM_001039467 // RGS19 // regulator of G-protein signaling 19 // 20q13.33 // 1028
8068022	MIR155HG	NR_001458 // MIR155HG // MIR155 host gene (non-protein coding) // --- // 114614
8069565	BTG3	NM_001130914 // BTG3 // BTG family. member 3 // 21q21.1-q21.2 // 10950 /// NM_00
8072659	TOM1	NR_024194 // TOM1 // target of myb1 (chicken) // 22q13.1 // 10043 /// NM_005488
8073039	GTPBP1	NM_004286 // GTPBP1 // GTP binding protein 1 // 22q13.1 // 9567 /// ENST00000216
8075695	APOL3	NR_027833 // APOL3 // apolipoprotein L. 3 // 22q13.1 // 80833 /// NR_027834 // A
8077450	ARL8B	NM_018184 // ARL8B // ADP-ribosylation factor-like 8B // 3p26.1 // 55207 /// ENS
8077858	ATG7	NM_006395 // ATG7 // ATG7 autophagy related 7 homolog (S. cerevisiae) // 3p25.3
8078405	CMTM7	NM_138410 // CMTM7 // CKLF-like MARVEL transmembrane domain containing 7 // 3p22
8081431	ALCAM	NM_001627 // ALCAM // activated leukocyte cell adhesion molecule // 3q13.1 // 21
8083594	PTX3	NM_002852 // PTX3 // pentraxin-related gene. rapidly induced by IL-1 beta // 3q2
8083690	IL12A	NM_000882 // IL12A // interleukin 12A (natural killer cell stimulatory factor 1.
8083901	FNDC3B	NM_022763 // FNDC3B // fibronectin type III domain containing 3B // 3q26.31 // 6
8084732	RTP4	NM_022147 // RTP4 // receptor (chemosensory) transporter protein 4 // 3q27.3 //
8086330	CSRNP1	NM_033027 // CSRNP1 // cysteine-serine-rich nuclear protein 1 // 3p22 // 64651 /
8086406	SEC22C	NM_004206 // SEC22C // SEC22 vesicle trafficking protein homolog C (S. cerevisia
8087739	CISH	NM_013324 // CISH // cytokine inducible SH2-containing protein // 3p21.3 // 1154
8089771	CD80	NM_005191 // CD80 // CD80 molecule // 3q13.3-q21 // 941 /// ENST00000264246 // C
8090577	MBD4	NM_003925 // MBD4 // methyl-CpG binding domain protein 4 // 3q21-q22 // 8930 ///
8092348	LAMP3	NM_014398 // LAMP3 // lysosomal-associated membrane protein 3 // 3q26.3-q27 // 2
8094240	CD38	NM_001775 // CD38 // CD38 molecule // 4p15 // 952 /// ENST00000226279 // CD38 //
8096635	NFKB1	NM_003998 // NFKB1 // nuclear factor of kappa light polypeptide gene enhancer in
8097461	CCRN4L	NM_012118 // CCRN4L // CCR4 carbon catabolite repression 4-like (S. cerevisiae)
8097468	NA	---
8101699	NA	---
8102594	TNIP3	NM_024873 // TNIP3 // TNFAIP3 interacting protein 3 // 4q27 // 79931 /// NM_0011
8107520	TNFAIP8	NM_014350 // TNFAIP8 // tumor necrosis factor. alpha-induced protein 8 // 5q23.1
8107673	GRAMD3	NM_023927 // GRAMD3 // GRAM domain containing 3 // 5q23.2 // 65983 /// NM_001146
8110218	EIF4E1B	NM_001099408 // EIF4E1B // eukaryotic translation initiation factor 4E family me
8111925	C5orf39	NM_001014279 // C5orf39 // chromosome 5 open reading frame 39 // 5p12 // 389289
8112803	LHFPL2	NM_005779 // LHFPL2 // lipoma HMGIC fusion partner-like 2 // 5q14.1 // 10184 ///
8113542	REEP5	NM_005669 // REEP5 // receptor accessory protein 5 // 5q22-q23 // 7905 /// ENST0
8113790	37681	NM_178450 // MARCH3 // membrane-associated ring finger (C3HC4) 3 // 5q23.2 // 11
8115570	IL12B	NM_002187 // IL12B // interleukin 12B (natural killer cell stimulatory factor 2.
8116998	JARID2	NM_004973 // JARID2 // jumonji. AT rich interactive domain 2 // 6p24-p23 // 3720
8118142	TNF	NM_000594 // TNF // tumor necrosis factor (TNF superfamily. member 2) // 6p21.3
8123129	WTAP	NM_004906 // WTAP // Wilms tumor 1 associated protein // 6q25-q27 // 9589 /// NM
8123137	ACAT2	NM_005891 // ACAT2 // acetyl-Coenzyme A acetyltransferase 2 // 6q25.3 // 39 ///
8123232	SLC22A1	NM_003057 // SLC22A1 // solute carrier family 22 (organic cation transporter). m
8123558	HUS1B	NM_148959 // HUS1B // HUS1 checkpoint homolog b (S. pombe) // 6p25.3 // 135458 /
8126303	TREM1	NM_018643 // TREM1 // triggering receptor expressed on myeloid cells 1 // 6p21.1
8126952	WTAP	NM_004906 // WTAP // Wilms tumor 1 associated protein // 6q25-q27 // 9589 /// NM
8129953	HIVEP2	NM_006734 // HIVEP2 // human immunodeficiency virus type I enhancer binding prot
8131666	ITGB8	NM_002214 // ITGB8 // integrin. beta 8 // 7p21.1 // 3696 /// ENST00000222573 //
8131803	IL6	NM_000600 // IL6 // interleukin 6 (interferon. beta 2) // 7p21 // 3569 /// ENST0
8134552	ARPC1B	NM_005720 // ARPC1B // actin related protein 2/3 complex. subunit 1B. 41kDa // 7
8138466	MACC1	NM_182762 // MACC1 // metastasis associated in colon cancer 1 // 7p21.1 // 34638
8138542	IL6	NM_000600 // IL6 // interleukin 6 (interferon. beta 2) // 7p21 // 3569 /// ENST0
8142401	NA	---
8143279	ZC3HAV1	NM_020119 // ZC3HAV1 // zinc finger CCCH-type. antiviral 1 // 7q34 // 56829 ///
8143471	CLEC5A	NM_013252 // CLEC5A // C-type lectin domain family 5. member A // 7q33 // 23601
8145529	NA	---
8148149	ZHX2	NM_014943 // ZHX2 // zinc fingers and homeoboxes 2 // 8q24.13 // 22882 /// ENST0
8148304	TRIB1	NM_025195 // TRIB1 // tribbles homolog 1 (Drosophila) // 8q24.13 // 10221 /// EN
8150112	GSR	NM_000637 // GSR // glutathione reductase // 8p21.1 // 2936 /// ENST00000221130
8151334	MSC	NM_005098 // MSC // musculin (activated B-cell factor-1) // 8q21 // 9242 /// ENS
8154962	DNAJB5	NM_001135004 // DNAJB5 // DnaJ (Hsp40) homolog. subfamily B. member 5 // 9p13.3
8155453	NA	---
8157933	ZBTB43	NM_014007 // ZBTB43 // zinc finger and BTB domain containing 43 // 9q33-q34 // 2
8157941	ZBTB34	NM_001099270 // ZBTB34 // zinc finger and BTB domain containing 34 // 9q33.3 //
8157945	ZBTB34	NM_001099270 // ZBTB34 // zinc finger and BTB domain containing 34 // 9q33.3 //
8160360	IFNB1	NM_002176 // IFNB1 // interferon. beta 1. fibroblast // 9p21 // 3456 /// ENST000
8161375	NA	---
8163618	TNFSF15	NM_005118 // TNFSF15 // tumor necrosis factor (ligand) superfamily. member 15 //
8163825	TRAF1	NM_005658 // TRAF1 // TNF receptor-associated factor 1 // 9q33-q34 // 7185 /// E
8165258	AGPAT2	NM_006412 // AGPAT2 // 1-acylglycerol-3-phosphate O-acyltransferase 2 (lysophosp
8169603	LONRF3	NM_001031855 // LONRF3 // LON peptidase N-terminal domain and ring finger 3 // X
8177983	TNF	NM_000594 // TNF // tumor necrosis factor (TNF superfamily. member 2) // 6p21.3
8179263	TNF	NM_000594 // TNF // tumor necrosis factor (TNF superfamily. member 2) // 6p21.3
