# Supplementary material for: CD14 and Complement Crosstalk and Largely Mediate the Transcriptional Response to Escherichia coli in Human Whole Blood as Revealed by DNA Microarray
Source: PLoS One. 2015 Feb 23;10(2):e0117261. doi: 10.1371/journal.pone.0117261 (PMC4338229; doi:10.1371/journal.pone.0117261)
Supplement: S3 File — (XLSX) [file pone.0117261.s009.xlsx]

## Sheet: Additive
Transcript.ID	Gene.Symbol	gene_assignment
7896817	ISG15	NM_005101 // ISG15 // ISG15 ubiquitin-like modifier // 1p36.33 // 9636 /// ENST0
7897322	PHF13	NM_153812 // PHF13 // PHD finger protein 13 // 1p36.31 // 148479 /// ENST0000037
7897370	VAMP3	NM_004781 // VAMP3 // vesicle-associated membrane protein 3 (cellubrevin) // 1p3
7897449	SPSB1	NM_025106 // SPSB1 // splA/ryanodine receptor domain and SOCS box containing 1 /
7897522	RBP7	NM_052960 // RBP7 // retinol binding protein 7. cellular // 1p36.22 // 116362 //
7897728	FBXO6	NM_018438 // FBXO6 // F-box protein 6 // 1p36.22 // 26270 /// ENST00000376753 //
7897801	RNU5E	NR_002754 // RNU5E // RNA. U5E small nuclear // 1p36.22 // 26829 /// M77839 // R
7897877	TNFRSF1B	NM_001066 // TNFRSF1B // tumor necrosis factor receptor superfamily. member 1B /
7898161	EFHD2	NM_024329 // EFHD2 // EF-hand domain family. member D2 // 1p36.21 // 79180 /// E
7898278	SPEN	NM_015001 // SPEN // spen homolog. transcriptional regulator (Drosophila) // 1p3
7898448	PADI4	NM_012387 // PADI4 // peptidyl arginine deiminase. type IV // 1p36.13 // 23569 /
7898483	ARHGEF10L	NM_018125 // ARHGEF10L // Rho guanine nucleotide exchange factor (GEF) 10-like /
7898574	C1orf151	NM_001032363 // C1orf151 // chromosome 1 open reading frame 151 // 1p36.13 // 44
7898655	CDA	NM_001785 // CDA // cytidine deaminase // 1p36.2-p35 // 978 /// ENST00000375071
7898988	CLIC4	NM_013943 // CLIC4 // chloride intracellular channel 4 // 1p36.11 // 25932 /// E
7899057	FAM54B	NM_019557 // FAM54B // family with sequence similarity 54. member B // 1p36.11 /
7899361	STX12	NM_177424 // STX12 // syntaxin 12 // 1p35-p34.1 // 23673 /// ENST00000373943 //
7899394	C1orf38	NM_001105556 // C1orf38 // chromosome 1 open reading frame 38 // 1p35.3 // 9473
7900095	MAP7D1	NM_018067 // MAP7D1 // MAP7 domain containing 1 // 1p34.3 // 55700 /// ENST00000
7900129	C1orf113	NM_024676 // C1orf113 // chromosome 1 open reading frame 113 // 1p34.3 // 79729
7900146	ZC3H12A	NM_025079 // ZC3H12A // zinc finger CCCH-type containing 12A // 1p34.3 // 80149
7900365	MFSD2	NM_001136493 // MFSD2 // major facilitator superfamily domain containing 2 // 1p
7900382	CAP1	NM_006367 // CAP1 // CAP. adenylate cyclase-associated protein 1 (yeast) // 1p34
7900922	ATP6V0B	NM_004047 // ATP6V0B // ATPase. H+ transporting. lysosomal 21kDa. V0 subunit b /
7901895	ATG4C	NM_032852 // ATG4C // ATG4 autophagy related 4 homolog C (S. cerevisiae) // 1p31
7902227	GADD45A	NM_001924 // GADD45A // growth arrest and DNA-damage-inducible. alpha // 1p31.2-
7902308	FPGT	NM_003838 // FPGT // fucose-1-phosphate guanylyltransferase // 1p31.1 // 8790 //
7902553	IFI44	NM_006417 // IFI44 // interferon-induced protein 44 // 1p31.1 // 10561 /// ENST0
7903294	HIAT1	NM_033055 // HIAT1 // hippocampus abundant transcript 1 // 1p21.2 // 64645 /// E
7903393	S1PR1	NM_001400 // S1PR1 // sphingosine-1-phosphate receptor 1 // 1p21 // 1901 /// ENS
7903507	FAM102B	NM_001010883 // FAM102B // family with sequence similarity 102. member B // 1p13
7903586	TMEM167B	NM_020141 // TMEM167B // transmembrane protein 167B // 1p13.3 // 56900 /// ENST0
7903619	SARS	NM_006513 // SARS // seryl-tRNA synthetase // 1p13.3-p13.1 // 6301 /// ENST00000
7903703	GNAI3	NM_006496 // GNAI3 // guanine nucleotide binding protein (G protein). alpha inhi
7903719	AMPD2	NM_004037 // AMPD2 // adenosine monophosphate deaminase 2 (isoform L) // 1p13.3
7903908	CEPT1	NM_006090 // CEPT1 // choline/ethanolamine phosphotransferase 1 // 1p13.3 // 103
7903980	C1orf162	BC017973 // C1orf162 // chromosome 1 open reading frame 162 // 1p13.2 // 128346
7904018	CTTNBP2NL	NM_018704 // CTTNBP2NL // CTTNBP2 N-terminal like // 1p13.2 // 55917 /// ENST000
7904050	MOV10	NM_020963 // MOV10 // Mov10. Moloney leukemia virus 10. homolog (mouse) // 1p13.
7904303	IGSF2	NM_004258 // IGSF2 // immunoglobulin superfamily. member 2 // 1p13 // 9398 /// E
7904715	NA	---
7904726	TXNIP	NM_006472 // TXNIP // thioredoxin interacting protein // 1q21.1 // 10628 /// ENS
7904965	PDE4DIP	AB042555 // PDE4DIP // phosphodiesterase 4D interacting protein // 1q12 // 9659
7905116	PLEKHO1	NM_016274 // PLEKHO1 // pleckstrin homology domain containing. family O member 1
7905233	ADAMTSL4	NM_019032 // ADAMTSL4 // ADAMTS-like 4 // 1q21.3 // 54507 /// NM_025008 // ADAMT
7905349	TNFAIP8L2	NM_024575 // TNFAIP8L2 // tumor necrosis factor. alpha-induced protein 8-like 2
7905355	SCNM1	NM_024041 // SCNM1 // sodium channel modifier 1 // 1q21.3 // 79005 /// ENST00000
7905571	S100A9	NM_002965 // S100A9 // S100 calcium binding protein A9 // 1q21 // 6280 /// ENST0
7905854	ZBTB7B	NM_015872 // ZBTB7B // zinc finger and BTB domain containing 7B // 1q21.3 // 510
7906107	SEMA4A	NM_022367 // SEMA4A // sema domain. immunoglobulin domain (Ig). transmembrane do
7906330	CD1D	NM_001766 // CD1D // CD1d molecule // 1q22-q23 // 912 /// ENST00000368171 // CD1
7906348	CD1C	NM_001765 // CD1C // CD1c molecule // 1q22-q23 // 911 /// ENST00000368170 // CD1
7906377	MNDA	NM_002432 // MNDA // myeloid cell nuclear differentiation antigen // 1q22 // 433
7906400	IFI16	NM_005531 // IFI16 // interferon. gamma-inducible protein 16 // 1q22 // 3428 ///
7906613	SLAMF7	NM_021181 // SLAMF7 // SLAM family member 7 // 1q23.1-q24.1 // 57823 /// ENST000
7907171	BLZF1	NM_003666 // BLZF1 // basic leucine zipper nuclear factor 1 // 1q24 // 8548 ///
7907430	FASLG	NM_000639 // FASLG // Fas ligand (TNF superfamily. member 6) // 1q23 // 356 ///
7907702	SOAT1	NM_003101 // SOAT1 // sterol O-acyltransferase 1 // 1q25 // 6646 /// ENST0000036
7908003	NPL	NM_030769 // NPL // N-acetylneuraminate pyruvate lyase (dihydrodipicolinate synt
7908169	RNF2	NM_007212 // RNF2 // ring finger protein 2 // 1q25.3 // 6045 /// ENST00000367510
7908597	NR5A2	NM_205860 // NR5A2 // nuclear receptor subfamily 5. group A. member 2 // 1q32.1
7908614	CAMSAP1L1	NM_203459 // CAMSAP1L1 // calmodulin regulated spectrin-associated protein 1-lik
7908867	TMEM183A	NM_138391 // TMEM183A // transmembrane protein 183A // 1q32.1 // 92703 /// NM_00
7909188	IKBKE	NM_014002 // IKBKE // inhibitor of kappa light polypeptide gene enhancer in B-ce
7909527	NA	---
7909801	LYPLAL1	NM_138794 // LYPLAL1 // lysophospholipase-like 1 // 1q41 // 127018 /// ENST00000
7909877	MOSC1	NM_022746 // MOSC1 // MOCO sulphurase C-terminal domain containing 1 // 1q41 //
7909898	MIA3	NM_198551 // MIA3 // melanoma inhibitory activity family. member 3 // 1q41 // 37
7910014	CNIH4	NM_014184 // CNIH4 // cornichon homolog 4 (Drosophila) // 1q42.11 // 29097 /// E
7910385	NA	---
7910520	GNPAT	NM_014236 // GNPAT // glyceronephosphate O-acyltransferase // 1q42 // 8443 /// E
7910651	TBCE	NM_001079515 // TBCE // tubulin folding cofactor E // 1q42.3 // 6905 /// NM_0031
7910680	GPR137B	NM_003272 // GPR137B // G protein-coupled receptor 137B // 1q42-q43 // 7107 ///
7910950	KMO	NM_003679 // KMO // kynurenine 3-monooxygenase (kynurenine 3-hydroxylase) // 1q4
7911403	TNFRSF18	NM_004195 // TNFRSF18 // tumor necrosis factor receptor superfamily. member 18 /
7911413	TNFRSF4	NM_003327 // TNFRSF4 // tumor necrosis factor receptor superfamily. member 4 //
7912198	ENO1	NM_001428 // ENO1 // enolase 1. (alpha) // 1p36.3-p36.2 // 2023 /// ENST00000234
7912239	GPR157	NM_024980 // GPR157 // G protein-coupled receptor 157 // 1p36.23 // 80045 /// EN
7912928	SDHB	NM_003000 // SDHB // succinate dehydrogenase complex. subunit B. iron sulfur (Ip
7912937	PADI2	NM_007365 // PADI2 // peptidyl arginine deiminase. type II // 1p36.13 // 11240 /
7913001	UBR4	NM_020765 // UBR4 // ubiquitin protein ligase E3 component n-recognin 4 // 1p36.
7913694	FUCA1	NM_000147 // FUCA1 // fucosidase. alpha-L- 1. tissue // 1p34 // 2517 /// ENST000
7913883	PAFAH2	NM_000437 // PAFAH2 // platelet-activating factor acetylhydrolase 2. 40kDa // 1p
7914127	IFI6	NM_002038 // IFI6 // interferon. alpha-inducible protein 6 // 1p35 // 2537 /// N
7914270	LAPTM5	NM_006762 // LAPTM5 // lysosomal protein transmembrane 5 // 1p34 // 7805 /// ENS
7914489	PTP4A2	NM_080391 // PTP4A2 // protein tyrosine phosphatase type IVA. member 2 // 1p35 /
7914603	RNF19B	NM_153341 // RNF19B // ring finger protein 19B // 1p35.1 // 127544 /// NM_001127
7914904	STK40	NM_032017 // STK40 // serine/threonine kinase 40 // 1p34.3 // 83931 /// ENST0000
7915045	C1orf109	BC018109 // C1orf109 // chromosome 1 open reading frame 109 // 1p34.3 // 54955 /
7915147	FHL3	NM_004468 // FHL3 // four and a half LIM domains 3 // 1p34 // 2275 /// ENST00000
7915286	PPT1	NM_000310 // PPT1 // palmitoyl-protein thioesterase 1 // 1p32 // 5538 /// NM_001
7915472	SLC2A1	NM_006516 // SLC2A1 // solute carrier family 2 (facilitated glucose transporter)
7915718	TESK2	NM_007170 // TESK2 // testis-specific kinase 2 // 1p32 // 10420 /// ENST00000372
7915846	MKNK1	NM_003684 // MKNK1 // MAP kinase interacting serine/threonine kinase 1 // 1p33 /
7916120	TXNDC12	NM_015913 // TXNDC12 // thioredoxin domain containing 12 (endoplasmic reticulum)
7916493	PPAP2B	NM_003713 // PPAP2B // phosphatidic acid phosphatase type 2B // 1pter-p22.1 // 8
7917283	MCOLN2	NM_153259 // MCOLN2 // mucolipin 2 // 1p22 // 255231 /// ENST00000370608 // MCOL
7917472	GTF2B	NM_001514 // GTF2B // general transcription factor IIB // 1p22-p21 // 2959 /// E
7917503	GBP3	NM_018284 // GBP3 // guanylate binding protein 3 // 1p22.2 // 2635 /// ENST00000
7917514	NA	---
7917516	GBP1	NM_002053 // GBP1 // guanylate binding protein 1. interferon-inducible. 67kDa //
7917528	NA	---
7917530	NA	---
7917532	GBP2	NM_004120 // GBP2 // guanylate binding protein 2. interferon-inducible // 1p22.2
7917548	GBP7	NM_207398 // GBP7 // guanylate binding protein 7 // 1p22.2 // 388646 /// ENST000
7917561	GBP4	NM_052941 // GBP4 // guanylate binding protein 4 // 1p22.2 // 115361 /// ENST000
7917576	GBP5	NM_052942 // GBP5 // guanylate binding protein 5 // 1p22.2 // 115362 /// NM_0011
7917707	EVI5	NM_005665 // EVI5 // ecotropic viral integration site 5 // 1p22.1 // 7813 /// EN
7917875	F3	NM_001993 // F3 // coagulation factor III (thromboplastin. tissue factor) // 1p2
7917954	FRRS1	NM_001013660 // FRRS1 // ferric-chelate reductase 1 // 1p21.2 // 391059 /// ENST
7918188	SLC25A24	NM_013386 // SLC25A24 // solute carrier family 25 (mitochondrial carrier; phosph
7918323	SORT1	NM_002959 // SORT1 // sortilin 1 // 1p21.3-p13.1|1p21.3-p13.1 // 6272 /// ENST00
7918457	KCNA3	NM_002232 // KCNA3 // potassium voltage-gated channel. shaker-related subfamily.
7919168	PDE4DIP	NM_022359 // PDE4DIP // phosphodiesterase 4D interacting protein // 1q12 // 9659
7919556	NA	---
7919560	NA	---
7919800	CTSS	NM_004079 // CTSS // cathepsin S // 1q21 // 1520 /// ENST00000368985 // CTSS //
7919856	LASS2	NM_181746 // LASS2 // LAG1 homolog. ceramide synthase 2 // 1q21.3 // 29956 /// N
7919971	RFX5	NM_000449 // RFX5 // regulatory factor X. 5 (influences HLA class II expression)
7920128	S100A11	NM_005620 // S100A11 // S100 calcium binding protein A11 // 1q21 // 6282 /// ENS
7920244	S100A8	NM_002964 // S100A8 // S100 calcium binding protein A8 // 1q21 // 6279 /// ENST0
7920258	S100A6	NM_014624 // S100A6 // S100 calcium binding protein A6 // 1q21 // 6277 /// ENST0
7920531	ADAR	NM_001111 // ADAR // adenosine deaminase. RNA-specific // 1q21.1-q21.2 // 103 //
7921003	C1orf61	NM_006365 // C1orf61 // chromosome 1 open reading frame 61 // 1q22 // 10485 ///
7921012	NA	---
7921228	ETV3	NM_001145312 // ETV3 // ets variant 3 // 1q21-q23 // 2117 /// NM_005240 // ETV3
7921434	AIM2	NM_004833 // AIM2 // absent in melanoma 2 // 1q22 // 9447 /// ENST00000368130 //
7921652	SLAMF1	NM_003037 // SLAMF1 // signaling lymphocytic activation molecule family member 1
7921667	CD48	NM_001778 // CD48 // CD48 molecule // 1q21.3-q22 // 962 /// ENST00000368046 // C
7921793	DEDD	NM_032998 // DEDD // death effector domain containing // 1q23.3 // 9191 /// NM_0
7922051	CREG1	NM_003851 // CREG1 // cellular repressor of E1A-stimulated genes 1 // 1q24 // 88
7922474	KIAA0040	NM_014656 // KIAA0040 // KIAA0040 // 1q24-q25 // 9674 /// NM_001162893 // KIAA00
7922504	RFWD2	NM_022457 // RFWD2 // ring finger and WD repeat domain 2 // 1q25.1-q25.2 // 6432
7922610	ABL2	NM_007314 // ABL2 // v-abl Abelson murine leukemia viral oncogene homolog 2 (arg
7922648	TOR1AIP1	NM_015602 // TOR1AIP1 // torsin A interacting protein 1 // 1q24.2 // 26092 /// E
7922669	STX6	NM_005819 // STX6 // syntaxin 6 // 1q25.3 // 10228 /// ENST00000258301 // STX6 /
7922823	EDEM3	NM_025191 // EDEM3 // ER degradation enhancer. mannosidase alpha-like 3 // 1q24-
7922846	FAM129A	NM_052966 // FAM129A // family with sequence similarity 129. member A // 1q25 //
7923406	PTPN7	NM_080588 // PTPN7 // protein tyrosine phosphatase. non-receptor type 7 // 1q32.
7923547	CHI3L1	NM_001276 // CHI3L1 // chitinase 3-like 1 (cartilage glycoprotein-39) // 1q32.1
7923662	PIK3C2B	NM_002646 // PIK3C2B // phosphoinositide-3-kinase. class 2. beta polypeptide //
7923907	IL10	NM_000572 // IL10 // interleukin 10 // 1q31-q32 // 3586 /// ENST00000423557 // I
7924029	LAMB3	NM_001017402 // LAMB3 // laminin. beta 3 // 1q32 // 3914 /// NM_001127641 // LAM
7924526	TP53BP2	NM_005426 // TP53BP2 // tumor protein p53 binding protein. 2 // 1q42.1 // 7159 /
7924603	LBR	NM_002296 // LBR // lamin B receptor // 1q42.1 // 3930 /// NM_194442 // LBR // l
7925062	SIPA1L2	NM_020808 // SIPA1L2 // signal-induced proliferation-associated 1 like 2 // 1q42
7925201	ARID4B	NM_016374 // ARID4B // AT rich interactive domain 4B (RBP1-like) // 1q42.1-q43 /
7925250	GNG4	NM_001098721 // GNG4 // guanine nucleotide binding protein (G protein). gamma 4
7925480	FH	NM_000143 // FH // fumarate hydratase // 1q42.1 // 2271 /// ENST00000366560 // F
7925954	NET1	NM_001047160 // NET1 // neuroepithelial cell transforming 1 // 10p15 // 10276 //
7926021	RBM17	NM_001145547 // RBM17 // RNA binding motif protein 17 // 10p15.1 // 84991 /// NM
7926239	OPTN	NM_001008211 // OPTN // optineurin // 10p13 // 10133 /// NM_001008213 // OPTN //
7926368	VIM	NM_003380 // VIM // vimentin // 10p13 // 7431 /// ENST00000224237 // VIM // vime
7926545	PLXDC2	NM_032812 // PLXDC2 // plexin domain containing 2 // 10p12.31 // 84898 /// ENST0
7926786	APBB1IP	NM_019043 // APBB1IP // amyloid beta (A4) precursor protein-binding. family B. m
7926821	MASTL	NM_032844 // MASTL // microtubule associated serine/threonine kinase-like // 10p
7926983	CREM	NM_183013 // CREM // cAMP responsive element modulator // 10p11.21 // 1390 /// N
7927215	ALOX5	NM_000698 // ALOX5 // arachidonate 5-lipoxygenase // 10q11.2 // 240 /// ENST0000
7927405	WDFY4	NM_020945 // WDFY4 // WDFY family member 4 // 10q11.22-q11.23 // 57705 /// ENST0
7927425	WDFY4	NM_020945 // WDFY4 // WDFY family member 4 // 10q11.22-q11.23 // 57705 /// ENST0
7927786	REEP3	NM_001001330 // REEP3 // receptor accessory protein 3 // 10q21.3 // 221035 /// E
7927799	REEP3	ENST00000298249 // REEP3 // receptor accessory protein 3 // 10q21.3 // 221035 //
7928019	HK1	NM_033500 // HK1 // hexokinase 1 // 10q22 // 3098 /// NM_033498 // HK1 // hexoki
7928119	EIF4EBP2	NM_004096 // EIF4EBP2 // eukaryotic translation initiation factor 4E binding pro
7928444	VCL	NM_014000 // VCL // vinculin // 10q22.2 // 7414 /// NM_003373 // VCL // vinculin
7928558	ZMIZ1	NM_020338 // ZMIZ1 // zinc finger. MIZ-type containing 1 // 10q22.3 // 57178 ///
7928944	PAPSS2	NM_004670 // PAPSS2 // 3'-phosphoadenosine 5'-phosphosulfate synthase 2 // 10q23
7928959	PTEN	NM_000314 // PTEN // phosphatase and tensin homolog // 10q23.3 // 5728 /// U9243
7929032	FAS	NM_000043 // FAS // Fas (TNF receptor superfamily. member 6) // 10q24.1 // 355 /
7929047	IFIT2	NM_001547 // IFIT2 // interferon-induced protein with tetratricopeptide repeats
7929052	IFIT3	NM_001031683 // IFIT3 // interferon-induced protein with tetratricopeptide repea
7929065	IFIT1	NM_001548 // IFIT1 // interferon-induced protein with tetratricopeptide repeats
7929072	IFIT5	NM_012420 // IFIT5 // interferon-induced protein with tetratricopeptide repeats
7929511	ENTPD1	NM_001776 // ENTPD1 // ectonucleoside triphosphate diphosphohydrolase 1 // 10q24
7929624	PGAM1	NM_002629 // PGAM1 // phosphoglycerate mutase 1 (brain) // 10q25.3 // 5223 /// N
7929677	PI4K2A	NM_018425 // PI4K2A // phosphatidylinositol 4-kinase type 2 alpha // 10q24 // 55
7929919	SFXN3	NM_030971 // SFXN3 // sideroflexin 3 // 10q24.31 // 81855 /// ENST00000393459 //
7930074	NFKB2	NM_002502 // NFKB2 // nuclear factor of kappa light polypeptide gene enhancer in
7930139	TRIM8	NM_030912 // TRIM8 // tripartite motif-containing 8 // 10q24.3 // 81603 /// ENST
7930299	C10orf78	NM_145247 // C10orf78 // chromosome 10 open reading frame 78 // 10q25.1 // 11939
7930413	DUSP5	NM_004419 // DUSP5 // dual specificity phosphatase 5 // 10q25 // 1847 /// ENST00
7931081	PLEKHA1	NM_021622 // PLEKHA1 // pleckstrin homology domain containing. family A (phospho
7931353	PTPRE	NM_006504 // PTPRE // protein tyrosine phosphatase. receptor type. E // 10q26 //
7931810	KLF6	NM_001300 // KLF6 // Kruppel-like factor 6 // 10p15 // 1316 /// NR_027653 // KLF
7931899	IL15RA	NM_002189 // IL15RA // interleukin 15 receptor. alpha // 10p15-p14 // 3601 /// N
7931914	IL2RA	NM_000417 // IL2RA // interleukin 2 receptor. alpha // 10p15-p14 // 3559 /// ENS
7932796	SVIL	NM_021738 // SVIL // supervillin // 10p11.2 // 6840 /// NM_003174 // SVIL // sup
7933723	IPMK	NM_152230 // IPMK // inositol polyphosphate multikinase // 10q21.1 // 253430 ///
7933877	JMJD1C	NM_004241 // JMJD1C // jumonji domain containing 1C // 10q21.3 // 221037 /// NM_
7934196	PSAP	NM_002778 // PSAP // prosaposin // 10q21-q22 // 5660 /// NM_001042465 // PSAP //
7934852	GLUD1	NM_005271 // GLUD1 // glutamate dehydrogenase 1 // 10q23.3 // 2746 /// NM_012084
7934885	RNLS	NM_018363 // RNLS // renalase. FAD-dependent amine oxidase // 10q23.31 // 55328
7935337	PIK3AP1	NM_152309 // PIK3AP1 // phosphoinositide-3-kinase adaptor protein 1 // 10q24.1 /
7935425	RRP12	NM_015179 // RRP12 // ribosomal RNA processing 12 homolog (S. cerevisiae) // 10q
7935707	CHUK	NM_001278 // CHUK // conserved helix-loop-helix ubiquitous kinase // 10q24-q25 /
7936100	CALHM2	NM_015916 // CALHM2 // calcium homeostasis modulator 2 // 10pter-q26.12 // 51063
7936559	PDZD8	NM_173791 // PDZD8 // PDZ domain containing 8 // 10q25.3-q26.11 // 118987 /// EN
7936856	CHST15	NM_015892 // CHST15 // carbohydrate (N-acetylgalactosamine 4-sulfate 6-O) sulfot
7937135	C10orf93	NM_173572 // C10orf93 // chromosome 10 open reading frame 93 // 10q26.3 // 25535
7937175	TUBGCP2	NM_006659 // TUBGCP2 // tubulin. gamma complex associated protein 2 // 10q26.3 /
7937217	ECHS1	NM_004092 // ECHS1 // enoyl Coenzyme A hydratase. short chain. 1. mitochondrial
7937335	IFITM1	NM_003641 // IFITM1 // interferon induced transmembrane protein 1 (9-27) // 11p1
7937465	TALDO1	NM_006755 // TALDO1 // transaldolase 1 // 11p15.5-p15.4 // 6888 /// ENST00000319
7937508	CD151	NM_004357 // CD151 // CD151 molecule (Raph blood group) // 11p15.5 // 977 /// NM
7937735	LSP1	NM_002339 // LSP1 // lymphocyte-specific protein 1 // 11p15.5 // 4046 /// NM_001
7937940	OR52K3P	AF143328 // OR52K3P // olfactory receptor. family 52. subfamily K. member 3 pseu
7937942	OR52K1	NM_001005171 // OR52K1 // olfactory receptor. family 52. subfamily K. member 1 /
7938035	TRIM22	NM_006074 // TRIM22 // tripartite motif-containing 22 // 11p15 // 10346 /// ENST
7938047	NA	---
7938485	MICAL2	NM_014632 // MICAL2 // microtubule associated monoxygenase. calponin and LIM dom
7938592	FAR1	NM_032228 // FAR1 // fatty acyl CoA reductase 1 // 11p15.2 // 84188 /// ENST0000
7938951	ANO5	NM_213599 // ANO5 // anoctamin 5 // 11p14.3 // 203859 /// NM_001142649 // ANO5 /
7939492	LOC387763	NM_001145033 // LOC387763 // hypothetical protein LOC387763 // 11p11.2 // 387763
7939546	CD82	NM_002231 // CD82 // CD82 molecule // 11p11.2 // 3732 /// NM_001024844 // CD82 /
7940079	CTNND1	NM_001085458 // CTNND1 // catenin (cadherin-associated protein). delta 1 // 11q1
7940959	GPR137	NM_020155 // GPR137 // G protein-coupled receptor 137 // 11cen-q22.3 // 56834 //
7941236	CDC42EP2	NM_006779 // CDC42EP2 // CDC42 effector protein (Rho GTPase binding) 2 // 11q13
7941961	ALDH3B1	NM_000694 // ALDH3B1 // aldehyde dehydrogenase 3 family. member B1 // 11q13 // 2
7941985	TCIRG1	NM_006019 // TCIRG1 // T-cell. immune regulator 1. ATPase. H+ transporting. lyso
7942439	RELT	NM_032871 // RELT // RELT tumor necrosis factor receptor // 11q13.4 // 84957 ///
7942613	DGAT2	NM_032564 // DGAT2 // diacylglycerol O-acyltransferase homolog 2 (mouse) // 11q1
7942679	ACER3	NM_018367 // ACER3 // alkaline ceramidase 3 // 11q13.5 // 55331 /// ENST00000278
7943162	C11orf54	BC012298 // C11orf54 // chromosome 11 open reading frame 54 // 11q21 // 28970 //
7943218	PANX1	NM_015368 // PANX1 // pannexin 1 // 11q21 // 24145 /// ENST00000227638 // PANX1
7943715	ZC3H12C	NM_033390 // ZC3H12C // zinc finger CCCH-type containing 12C // 11q22.3 // 85463
7944185	CD3G	NM_000073 // CD3G // CD3g molecule. gamma (CD3-TCR complex) // 11q23 // 917 ///
7944722	UBASH3B	NM_032873 // UBASH3B // ubiquitin associated and SH3 domain containing. B // 11q
7944795	OR4D5	NM_001001965 // OR4D5 // olfactory receptor. family 4. subfamily D. member 5 //
7945169	TMEM45B	NM_138788 // TMEM45B // transmembrane protein 45B // 11q24.3 // 120224 /// ENST0
7945462	IRF7	NM_004031 // IRF7 // interferon regulatory factor 7 // 11p15.5 // 3665 /// NM_00
7945620	TOLLIP	NM_019009 // TOLLIP // toll interacting protein // 11p15.5 // 54472 /// ENST0000
7945666	CTSD	NM_001909 // CTSD // cathepsin D // 11p15.5 // 1509 /// ENST00000236671 // CTSD
7945962	TRIM21	NM_003141 // TRIM21 // tripartite motif-containing 21 // 11p15.5 // 6737 /// ENS
7946089	TRIM5	NM_033034 // TRIM5 // tripartite motif-containing 5 // 11p15 // 85363 /// NM_033
7946267	MRPL17	NM_022061 // MRPL17 // mitochondrial ribosomal protein L17 // 11p15.5-p15.4 // 6
7946292	CYB5R2	NM_016229 // CYB5R2 // cytochrome b5 reductase 2 // 11p15.4 // 51700 /// ENST000
7946439	TMEM9B	NM_020644 // TMEM9B // TMEM9 domain family. member B // 11p15.3 // 56674 /// ENS
7946446	NRIP3	NM_020645 // NRIP3 // nuclear receptor interacting protein 3 // 11p15.3 // 56675
7946478	DENND5A	NM_015213 // DENND5A // DENN/MADD domain containing 5A // 11p15.4 // 23258 /// E
7946569	RNF141	NM_016422 // RNF141 // ring finger protein 141 // 11p15.4 // 50862 /// ENST00000
7946988	HPS5	NM_181507 // HPS5 // Hermansky-Pudlak syndrome 5 // 11p14 // 11234 /// NM_007216
7947425	CD59	NM_203330 // CD59 // CD59 molecule. complement regulatory protein // 11p13 // 96
7947462	ABTB2	NM_145804 // ABTB2 // ankyrin repeat and BTB (POZ) domain containing 2 // 11p13
7947531	COMMD9	NM_014186 // COMMD9 // COMM domain containing 9 // 11p13 // 29099 /// NM_0011016
7947681	ARHGAP1	NM_004308 // ARHGAP1 // Rho GTPase activating protein 1 // 11p12-q12 // 392 ///
7948221	PRG2	NM_002728 // PRG2 // proteoglycan 2. bone marrow (natural killer cell activator.
7948364	MPEG1	NM_001039396 // MPEG1 // macrophage expressed 1 // 11q12.1 // 219972 /// ENST000
7948399	PATL1	NM_152716 // PATL1 // protein associated with topoisomerase II homolog 1 (yeast)
7948455	MS4A6A	NM_152852 // MS4A6A // membrane-spanning 4-domains. subfamily A. member 6A // 11
7948493	SLC15A3	NM_016582 // SLC15A3 // solute carrier family 15. member 3 // 11q12.2 // 51296 /
7948612	FADS1	NM_013402 // FADS1 // fatty acid desaturase 1 // 11q12.2-q13.1 // 3992 /// AF084
7948696	MTA2	NM_004739 // MTA2 // metastasis associated 1 family. member 2 // 11q12-q13.1 //
7948839	NXF1	NM_006362 // NXF1 // nuclear RNA export factor 1 // 11q12-q13 // 10482 /// NM_00
7949146	SF1	NM_004630 // SF1 // splicing factor 1 // 11q13 // 7536 /// NM_201995 // SF1 // s
7949776	CORO1B	NM_020441 // CORO1B // coronin. actin binding protein. 1B // 11q13.2 // 57175 //
7949808	PITPNM1	NM_004910 // PITPNM1 // phosphatidylinositol transfer protein. membrane-associat
7949882	ALDH3B2	NM_000695 // ALDH3B2 // aldehyde dehydrogenase 3 family. member B2 // 11q13 // 2
7950197	ARAP1	NM_015242 // ARAP1 // ArfGAP with RhoGAP domain. ankyrin repeat and PH domain 1
7950235	STARD10	NM_006645 // STARD10 // StAR-related lipid transfer (START) domain containing 10
7950578	PAK1	NM_001128620 // PAK1 // p21 protein (Cdc42/Rac)-activated kinase 1 // 11q13-q14
7950838	PICALM	NM_007166 // PICALM // phosphatidylinositol binding clathrin assembly protein //
7951004	C11orf75	NM_020179 // C11orf75 // chromosome 11 open reading frame 75 // 11q13.3-q23.3 //
7951259	MMP10	NM_002425 // MMP10 // matrix metallopeptidase 10 (stromelysin 2) // 11q22.3 // 4
7951372	CASP4	NM_033306 // CASP4 // caspase 4. apoptosis-related cysteine peptidase // 11q22.2
7951385	CASP5	NM_004347 // CASP5 // caspase 5. apoptosis-related cysteine peptidase // 11q22.2
7951397	CASP1	NM_033292 // CASP1 // caspase 1. apoptosis-related cysteine peptidase (interleuk
7951408	CARD16	NM_052889 // CARD16 // caspase recruitment domain family. member 16 // --- // 11
7951686	IL18	NM_001562 // IL18 // interleukin 18 (interferon-gamma-inducing factor) // 11q22.
7951977	FXYD6	NM_022003 // FXYD6 // FXYD domain containing ion transport regulator 6 // 11q23.
7952036	MPZL3	NM_198275 // MPZL3 // myelin protein zero-like 3 // 11q23.3 // 196264 /// ENST00
7952046	MPZL2	NM_144765 // MPZL2 // myelin protein zero-like 2 // 11q24 // 10205 /// NM_005797
7952484	TMEM218	NM_001080546 // TMEM218 // transmembrane protein 218 // 11q24.2 // 219854 /// EN
7952490	FEZ1	NM_005103 // FEZ1 // fasciculation and elongation protein zeta 1 (zygin I) // 11
7953012	WNT5B	NM_032642 // WNT5B // wingless-type MMTV integration site family. member 5B // 1
7953200	CCND2	NM_001759 // CCND2 // cyclin D2 // 12p13 // 894 /// ENST00000261254 // CCND2 //
7953321	LTBR	NM_002342 // LTBR // lymphotoxin beta receptor (TNFR superfamily. member 3) // 1
7953385	GAPDH	NM_002046 // GAPDH // glyceraldehyde-3-phosphate dehydrogenase // 12p13 // 2597
7953442	GPR162	NM_019858 // GPR162 // G protein-coupled receptor 162 // 12p13 // 27239 /// NM_0
7953508	TPI1	NM_000365 // TPI1 // triosephosphate isomerase 1 // 12p13 // 7167 /// NM_0011592
7953569	PTPN6	NM_080549 // PTPN6 // protein tyrosine phosphatase. non-receptor type 6 // 12p13
7953723	CLEC4A	NM_016184 // CLEC4A // C-type lectin domain family 4. member A // 12p13 // 50856
7953993	BCL2L14	NM_030766 // BCL2L14 // BCL2-like 14 (apoptosis facilitator) // 12p13-p12 // 793
7954090	EMP1	NM_001423 // EMP1 // epithelial membrane protein 1 // 12p12.3 // 2012 /// ENST00
7954436	LRMP	NM_006152 // LRMP // lymphoid-restricted membrane protein // 12p12.1 // 4033 ///
7954645	TSPAN11	NM_001080509 // TSPAN11 // tetraspanin 11 // 12p11.21 // 441631 /// ENST00000261
7954810	LRRK2	NM_198578 // LRRK2 // leucine-rich repeat kinase 2 // 12q12 // 120892 /// ENST00
7955110	DKFZP779L1853	ENST00000454785 // DKFZP779L1853 // hypothetical LOC643162 // 12q13.11 // 643162
7955156	CCDC65	NM_033124 // CCDC65 // coiled-coil domain containing 65 // 12q13.12 // 85478 ///
7955441	METTL7A	NM_014033 // METTL7A // methyltransferase like 7A // 12q13.12 // 25840 /// ENST0
7955464	DAZAP2	NM_014764 // DAZAP2 // DAZ associated protein 2 // 12q12 // 9802 /// NM_00113626
7955535	ACVR1B	NM_004302 // ACVR1B // activin A receptor. type IB // 12q13 // 91 /// NM_020328
7955589	NR4A1	NM_002135 // NR4A1 // nuclear receptor subfamily 4. group A. member 1 // 12q13 /
7955908	NCKAP1L	NM_005337 // NCKAP1L // NCK-associated protein 1-like // 12q13.1 // 3071 /// ENS
7956088	RAB5B	NM_002868 // RAB5B // RAB5B. member RAS oncogene family // 12q13 // 5869 /// ENS
7956105	IKZF4	NM_022465 // IKZF4 // IKAROS family zinc finger 4 (Eos) // 12q13 // 64375 /// EN
7956251	IL23A	NM_016584 // IL23A // interleukin 23. alpha subunit p19 // 12q13.3 // 51561 ///
7956524	PIP4K2C	NM_024779 // PIP4K2C // phosphatidylinositol-5-phosphate 4-kinase. type II. gamm
7956593	OS9	NM_006812 // OS9 // osteosarcoma amplified 9. endoplasmic reticulum lectin // 12
7956658	SLC16A7	NM_004731 // SLC16A7 // solute carrier family 16. member 7 (monocarboxylic acid
7956795	TBK1	NM_013254 // TBK1 // TANK-binding kinase 1 // 12q14.1 // 29110 /// ENST000003317
7956878	IRAK3	NM_007199 // IRAK3 // interleukin-1 receptor-associated kinase 3 // 12q14.3 // 1
7956908	NA	---
7957023	LYZ	NM_000239 // LYZ // lysozyme (renal amyloidosis) // 12q15 // 4069 /// ENST000002
7957177	RAB21	NM_014999 // RAB21 // RAB21. member RAS oncogene family // 12q21.1 // 23011 ///
7957510	C12orf74	BC107813 // C12orf74 // chromosome 12 open reading frame 74 // 12q22 // 338809 /
7957570	PLXNC1	NM_005761 // PLXNC1 // plexin C1 // 12q23.3 // 10154 /// ENST00000258526 // PLXN
7957759	APAF1	NM_181861 // APAF1 // apoptotic peptidase activating factor 1 // 12q23 // 317 //
7958019	DRAM1	NM_018370 // DRAM1 // DNA-damage regulated autophagy modulator 1 // 12q23.2 // 5
7958152	PGAM1	NM_002629 // PGAM1 // phosphoglycerate mutase 1 (brain) // 10q25.3 // 5223 /// N
7958466	ACACB	NM_001093 // ACACB // acetyl-Coenzyme A carboxylase beta // 12q24.11 // 32 /// E
7958784	ALDH2	NM_000690 // ALDH2 // aldehyde dehydrogenase 2 family (mitochondrial) // 12q24.2
7958828	TRAFD1	NM_001143906 // TRAFD1 // TRAF-type zinc finger domain containing 1 // 12q // 10
7958884	OAS1	NM_016816 // OAS1 // 2'.5'-oligoadenylate synthetase 1. 40/46kDa // 12q24.1 // 4
7958895	OAS3	NM_006187 // OAS3 // 2'-5'-oligoadenylate synthetase 3. 100kDa // 12q24.2 // 494
7958913	OAS2	NM_002535 // OAS2 // 2'-5'-oligoadenylate synthetase 2. 69/71kDa // 12q24.2 // 4
7959164	DYNLL1	NM_001037495 // DYNLL1 // dynein. light chain. LC8-type 1 // 12q24.23 // 8655 //
7959267	P2RX4	NM_002560 // P2RX4 // purinergic receptor P2X. ligand-gated ion channel. 4 // 12
7959574	SETD8	NM_020382 // SETD8 // SET domain containing (lysine methyltransferase) 8 // 12q2
7959834	GLT1D1	NM_144669 // GLT1D1 // glycosyltransferase 1 domain containing 1 // 12q24.33 //
7960383	PARP11	NM_020367 // PARP11 // poly (ADP-ribose) polymerase family. member 11 // 12p13.3
7960518	TNFRSF1A	NM_001065 // TNFRSF1A // tumor necrosis factor receptor superfamily. member 1A /
7960544	VAMP1	NM_199245 // VAMP1 // vesicle-associated membrane protein 1 (synaptobrevin 1) //
7960559	IFFO1	NM_080730 // IFFO1 // intermediate filament family orphan 1 // 12p13.3 // 25900
7960689	MLF2	NR_026581 // MLF2 // myeloid leukemia factor 2 // 12p13 // 8079 /// NM_005439 //
7960730	LPCAT3	NM_005768 // LPCAT3 // lysophosphatidylcholine acyltransferase 3 // 12p13 // 101
7960757	C1RL	NM_016546 // C1RL // complement component 1. r subcomponent-like // 12p13.31 //
7960794	CD163	NM_004244 // CD163 // CD163 molecule // 12p13.3 // 9332 /// NM_203416 // CD163 /
7960900	CLEC4E	NM_014358 // CLEC4E // C-type lectin domain family 4. member E // 12p13.31 // 26
7961120	CLEC7A	NM_197947 // CLEC7A // C-type lectin domain family 7. member A // 12p13.2 // 645
7961365	MANSC1	NM_018050 // MANSC1 // MANSC domain containing 1 // 12p13.2 // 54682 /// ENST000
7961371	DUSP16	NM_030640 // DUSP16 // dual specificity phosphatase 16 // 12p13 // 80824 /// ENS
7961440	PLBD1	NM_024829 // PLBD1 // phospholipase B domain containing 1 // 12p13.1 // 79887 //
7962194	H3F3C	NM_001013699 // H3F3C // H3 histone. family 3C // 12p11.21 // 440093 /// ENST000
7962250	CPNE8	NM_153634 // CPNE8 // copine VIII // 12q12 // 144402 /// ENST00000331366 // CPNE
7962537	SLC38A2	NM_018976 // SLC38A2 // solute carrier family 38. member 2 // 12q // 54407 /// E
7962689	VDR	NM_001017535 // VDR // vitamin D (1.25- dihydroxyvitamin D3) receptor // 12q13.1
7963054	TUBA1A	NM_006009 // TUBA1A // tubulin. alpha 1a // 12q12-q14.3 // 7846 /// ENST00000301
7963212	SLC11A2	NM_000617 // SLC11A2 // solute carrier family 11 (proton-coupled divalent metal
7963244	TFCP2	NM_005653 // TFCP2 // transcription factor CP2 // 12q13 // 7024 /// ENST00000257
7963770	GPR84	NM_020370 // GPR84 // G protein-coupled receptor 84 // 12q13.13 // 53831 /// ENS
7963774	ZNF385A	NM_015481 // ZNF385A // zinc finger protein 385A // 12q13.13 // 25946 /// NM_001
7963786	ITGA5	NM_002205 // ITGA5 // integrin. alpha 5 (fibronectin receptor. alpha polypeptide
7963911	CD63	NM_001780 // CD63 // CD63 molecule // 12q12-q13 // 967 /// NM_001040034 // CD63
7963946	MMP19	NM_002429 // MMP19 // matrix metallopeptidase 19 // 12q14 // 4327 /// ENST000003
7964119	STAT2	NM_005419 // STAT2 // signal transducer and activator of transcription 2. 113kDa
7964579	CTDSP2	NM_005730 // CTDSP2 // CTD (carboxy-terminal domain. RNA polymerase II. polypept
7964642	C12orf61	BC136288 // C12orf61 // chromosome 12 open reading frame 61 // 12q14.1 // 283416
7964658	NA	---
7964787	IFNG	NM_000619 // IFNG // interferon. gamma // 12q14 // 3458 /// ENST00000229135 // I
7964803	IL22	NM_020525 // IL22 // interleukin 22 // 12q15 // 50616 /// ENST00000328087 // IL2
7964834	CPM	NM_001874 // CPM // carboxypeptidase M // 12q14.3 // 1368 /// NM_198320 // CPM /
7965335	DUSP6	NM_001946 // DUSP6 // dual specificity phosphatase 6 // 12q22-q23 // 1848 /// NM
7965480	PGAM1	NM_002629 // PGAM1 // phosphoglycerate mutase 1 (brain) // 10q25.3 // 5223 /// N
7965510	TMCC3	NM_020698 // TMCC3 // transmembrane and coiled-coil domain family 3 // 12q22 //
7965606	HAL	NM_002108 // HAL // histidine ammonia-lyase // 12q22-q24.1 // 3034 /// ENST00000
7966089	CMKLR1	NM_001142343 // CMKLR1 // chemokine-like receptor 1 // 12q24.1 // 1240 /// NM_00
7966127	SELPLG	NM_003006 // SELPLG // selectin P ligand // 12q24 // 6404 /// ENST00000388962 //
7966135	CORO1C	NM_014325 // CORO1C // coronin. actin binding protein. 1C // 12q24.1 // 23603 //
7966268	GIT2	NM_057169 // GIT2 // G protein-coupled receptor kinase interacting ArfGAP 2 // 1
7966397	ATXN2	NM_002973 // ATXN2 // ataxin 2 // 12q24.1 // 6311 /// ENST00000377617 // ATXN2 /
7966621	SDS	NM_006843 // SDS // serine dehydratase // 12q24.13 // 10993 /// ENST00000257549
7967002	PXN	NM_001080855 // PXN // paxillin // 12q24.31 // 5829 /// NM_002859 // PXN // paxi
7967060	SFRS9	NM_003769 // SFRS9 // splicing factor. arginine/serine-rich 9 // 12q24.31 // 868
7967117	OASL	NM_003733 // OASL // 2'-5'-oligoadenylate synthetase-like // 12q24.2 // 8638 ///
7967175	KDM2B	NM_032590 // KDM2B // lysine (K)-specific demethylase 2B // 12q24.31 // 84678 //
7967318	NIACR1	NM_177551 // NIACR1 // niacin receptor 1 // 12q24.31 // 338442 /// ENST000003288
7967322	NIACR2	NM_006018 // NIACR2 // niacin receptor 2 // 12q24.31 // 8843 /// BC047891 // NIA
7967456	RILPL2	NM_145058 // RILPL2 // Rab interacting lysosomal protein-like 2 // 12q24.31 // 1
7967493	NCOR2	NM_006312 // NCOR2 // nuclear receptor co-repressor 2 // 12q24 // 9612 /// NM_00
7967636	MGC16384	NR_026666 // MGC16384 // hypothetical LOC114130 // 12q24.32 // 114130 /// AK0010
7967658	NA	---
7967794	ANKLE2	NM_015114 // ANKLE2 // ankyrin repeat and LEM domain containing 2 // 12q24.33 //
7968484	BRCA2	NM_000059 // BRCA2 // breast cancer 2. early onset // 13q12.3 // 675 /// ENST000
7968972	COX17	NM_005694 // COX17 // COX17 cytochrome c oxidase assembly homolog (S. cerevisiae
7968976	LRCH1	NM_015116 // LRCH1 // leucine-rich repeats and calponin homology (CH) domain con
7969129	PHF11	NM_001040443 // PHF11 // PHD finger protein 11 // 13q14.2 // 51131 /// NM_001040
7969145	ARL11	NM_138450 // ARL11 // ADP-ribosylation factor-like 11 // 13q14.2 // 115761 /// E
7969651	DNAJC3	NM_006260 // DNAJC3 // DnaJ (Hsp40) homolog. subfamily C. member 3 // 13q32.1 //
7969796	TM9SF2	NM_004800 // TM9SF2 // transmembrane 9 superfamily member 2 // 13q32.3 // 9375 /
7970162	ATP11A	NM_015205 // ATP11A // ATPase. class VI. type 11A // 13q34 // 23250 /// NM_03218
7970262	CUL4A	NM_001008895 // CUL4A // cullin 4A // 13q34 // 8451 /// NM_003589 // CUL4A // cu
7970301	TMCO3	NM_017905 // TMCO3 // transmembrane and coiled-coil domains 3 // 13q34 // 55002
7970441	GJB2	NM_004004 // GJB2 // gap junction protein. beta 2. 26kDa // 13q11-q12 // 2706 //
7970696	USP12	NM_182488 // USP12 // ubiquitin specific peptidase 12 // 13q12.13 // 219333 ///
7970737	FLT3	NM_004119 // FLT3 // fms-related tyrosine kinase 3 // 13q12 // 2322 /// ENST0000
7971296	EPSTI1	NM_001002264 // EPSTI1 // epithelial stromal interaction 1 (breast) // 13q13.3 /
7971573	RCBTB2	NM_001268 // RCBTB2 // regulator of chromosome condensation (RCC1) and BTB (POZ)
7972557	GPR183	NM_004951 // GPR183 // G protein-coupled receptor 183 // 13q32.3 // 1880 /// ENS
7972663	NA	---
7972840	TUBGCP3	NM_006322 // TUBGCP3 // tubulin. gamma complex associated protein 3 // 13q34 //
7972867	PCID2	NM_001127202 // PCID2 // PCI domain containing 2 // 13q34 // 55795 /// NM_001127
7973067	NP	NM_000270 // NP // nucleoside phosphorylase // 14q13.1 // 4860 /// ENST000003615
7973101	RNASE6	NM_005615 // RNASE6 // ribonuclease. RNase A family. k6 // 14q11.2 // 6039 /// E
7973336	MMP14	NM_004995 // MMP14 // matrix metallopeptidase 14 (membrane-inserted) // 14q11-q1
7973618	IRF9	NM_006084 // IRF9 // interferon regulatory factor 9 // 14q11.2 // 10379 /// ENST
7973629	REC8	NM_001048205 // REC8 // REC8 homolog (yeast) // 14q11.2-q12 // 9985 /// NM_00513
7974314	NA	---
7974341	GNG2	NM_053064 // GNG2 // guanine nucleotide binding protein (G protein). gamma 2 //
7974380	PSMC6	NM_002806 // PSMC6 // proteasome (prosome. macropain) 26S subunit. ATPase. 6 //
7974445	NA	---
7974473	FBXO34	NM_017943 // FBXO34 // F-box protein 34 // 14q22.3 // 55030 /// NM_152231 // FBX
7974481	NA	---
7974603	PSMA3	NM_002788 // PSMA3 // proteasome (prosome. macropain) subunit. alpha type. 3 //
7974621	ARID4A	NM_002892 // ARID4A // AT rich interactive domain 4A (RBP1-like) // 14q23.1 // 5
7974771	C14orf135	NM_022495 // C14orf135 // chromosome 14 open reading frame 135 // 14q23.1 // 644
7974851	HIF1A	NM_001530 // HIF1A // hypoxia inducible factor 1. alpha subunit (basic helix-loo
7974870	SNAPC1	NM_003082 // SNAPC1 // small nuclear RNA activating complex. polypeptide 1. 43kD
7975121	FNTB	NM_002028 // FNTB // farnesyltransferase. CAAX box. beta // 14q23-q24 // 2342 //
7975416	PCNX	NM_014982 // PCNX // pecanex homolog (Drosophila) // 14q24.2 // 22990 /// ENST00
7975779	FOS	NM_005252 // FOS // FBJ murine osteosarcoma viral oncogene homolog // 14q24.3 //
7975793	BATF	NM_006399 // BATF // basic leucine zipper transcription factor. ATF-like // 14q2
7976200	CALM1	NM_006888 // CALM1 // calmodulin 1 (phosphorylase kinase. delta) // 14q24-q31 //
7976858	DIO3	NM_001362 // DIO3 // deiodinase. iodothyronine. type III // 14q32 // 1735 /// EN
7976957	WDR20	NM_181291 // WDR20 // WD repeat domain 20 // 14q32.31 // 91833 /// NM_144574 //
7977003	RCOR1	NM_015156 // RCOR1 // REST corepressor 1 // 14q32.31 // 23186 /// ENST0000026224
7977046	TNFAIP2	NM_006291 // TNFAIP2 // tumor necrosis factor. alpha-induced protein 2 // 14q32
7977270	LOC388022	AK131040 // LOC388022 // hypothetical gene supported by AK131040 // 14q32.33 //
7977657	HNRNPC	NM_031314 // HNRNPC // heterogeneous nuclear ribonucleoprotein C (C1/C2) // 14q1
7977786	SLC7A7	NM_003982 // SLC7A7 // solute carrier family 7 (cationic amino acid transporter.
7978208	TINF2	NM_012461 // TINF2 // TERF1 (TRF1)-interacting nuclear factor 2 // 14q12 // 2627
7978272	CIDEB	NM_014430 // CIDEB // cell death-inducing DFFA-like effector b // 14q12 // 27141
7978586	CFL2	NM_138638 // CFL2 // cofilin 2 (muscle) // 14q12 // 1073 /// NM_021914 // CFL2 /
7978595	BAZ1A	NM_013448 // BAZ1A // bromodomain adjacent to zinc finger domain. 1A // 14q12-q1
7978644	NFKBIA	NM_020529 // NFKBIA // nuclear factor of kappa light polypeptide gene enhancer i
7978718	SEC23A	NM_006364 // SEC23A // Sec23 homolog A (S. cerevisiae) // 14q21.1 // 10484 /// E
7978776	C14orf106	NM_018353 // C14orf106 // chromosome 14 open reading frame 106 // 14q21.2 // 553
7979033	SAV1	NM_021818 // SAV1 // salvador homolog 1 (Drosophila) // 14q13-q23 // 60485 /// E
7979085	PYGL	NM_002863 // PYGL // phosphorylase. glycogen. liver // 14q21-q22 // 5836 /// ENS
7979269	GCH1	NM_000161 // GCH1 // GTP cyclohydrolase 1 // 14q22.1-q22.2 // 2643 /// NM_001024
7979455	RTN1	NM_021136 // RTN1 // reticulon 1 // 14q23.1 // 6252 /// NM_206852 // RTN1 // ret
7979473	DHRS7	NM_016029 // DHRS7 // dehydrogenase/reductase (SDR family) member 7 // 14q23.1 /
7979574	SGPP1	NM_030791 // SGPP1 // sphingosine-1-phosphate phosphatase 1 // 14q23.2 // 81537
7979813	ZFP36L1	NM_004926 // ZFP36L1 // zinc finger protein 36. C3H type-like 1 // 14q22-q24 //
7980044	PNMA1	NM_006029 // PNMA1 // paraneoplastic antigen MA1 // 14q24.3 // 9240 /// ENST0000
7980146	NPC2	NM_006432 // NPC2 // Niemann-Pick disease. type C2 // 14q24.3 // 10577 /// ENST0
7980535	DYNLL1	NM_001037494 // DYNLL1 // dynein. light chain. LC8-type 1 // 12q24.23 // 8655 //
7981249	SETD3	NM_032233 // SETD3 // SET domain containing 3 // 14q32.2 // 84193 /// NM_199123
7981290	WARS	NM_004184 // WARS // tryptophanyl-tRNA synthetase // 14q32.31 // 7453 /// NM_173
7981775	DKFZP547L112	ENST00000435482 // DKFZP547L112 // hypothetical protein DKFZp547L112 // 15q11.2
7982204	HMGN2	NM_005517 // HMGN2 // high-mobility group nucleosomal binding domain 2 // 1p36.1
7982326	KLF13	NM_015995 // KLF13 // Kruppel-like factor 13 // 15q12 // 51621 /// ENST000003071
7982564	SPRED1	NM_152594 // SPRED1 // sprouty-related. EVH1 domain containing 1 // 15q14 // 161
7982620	EIF2AK4	NM_001013703 // EIF2AK4 // eukaryotic translation initiation factor 2 alpha kina
7982878	CHP	NM_007236 // CHP // calcium binding protein P22 // 15q13.3 // 11261 /// ENST0000
7983111	SNAP23	NM_003825 // SNAP23 // synaptosomal-associated protein. 23kDa // 15q15.1-q15.2 /
7983157	TMEM62	NM_024956 // TMEM62 // transmembrane protein 62 // 15q15.2 // 80021 /// ENST0000
7983365	TRIM69	NM_182985 // TRIM69 // tripartite motif-containing 69 // 15q21.1 // 140691 /// N
7983393	SORD	NM_003104 // SORD // sorbitol dehydrogenase // 15q15.3 // 6652 /// ENST000002678
7983490	C15orf21	NR_022014 // C15orf21 // Dresden prostate cancer 2 // 15q21.1 // 283651 /// AY27
7983512	SQRDL	NM_021199 // SQRDL // sulfide quinone reductase-like (yeast) // 15q15 // 58472 /
7983763	MAPK6	NM_002748 // MAPK6 // mitogen-activated protein kinase 6 // 15q21 // 5597 /// EN
7984103	LACTB	NM_032857 // LACTB // lactamase. beta // 15q22.1 // 114294 /// NM_171846 // LACT
7984112	RAB8B	NM_016530 // RAB8B // RAB8B. member RAS oncogene family // 15q22.2 // 51762 ///
7984124	APH1B	NM_031301 // APH1B // anterior pharynx defective 1 homolog B (C. elegans) // 15q
7984132	USP3	NM_006537 // USP3 // ubiquitin specific peptidase 3 // 15q22.3 // 9960 /// ENST0
7984779	PML	NM_033240 // PML // promyelocytic leukemia // 15q22 // 5371 /// NM_033244 // PML
7985224	TBC1D2B	NM_144572 // TBC1D2B // TBC1 domain family. member 2B // 15q24.3-q25.1 // 23102
7985493	TM6SF1	NM_023003 // TM6SF1 // transmembrane 6 superfamily member 1 // 15q24-q26 // 5334
7985605	ZNF592	NM_014630 // ZNF592 // zinc finger protein 592 // 15q25.3 // 9640 /// ENST000002
7985777	ISG20	NM_002201 // ISG20 // interferon stimulated exonuclease gene 20kDa // 15q26 // 3
7986463	LRRK1	NM_024652 // LRRK1 // leucine-rich repeat kinase 1 // 15q26.3 // 79705 /// ENST0
7987048	MTMR10	NM_017762 // MTMR10 // myotubularin related protein 10 // 15q13.3 // 54893 /// N
7987225	NOP10	NM_018648 // NOP10 // NOP10 ribonucleoprotein homolog (yeast) // 15q14-q15 // 55
7987454	BMF	NM_001003940 // BMF // Bcl2 modifying factor // 15q14 // 90427 /// NM_033503 //
7987892	ZFP106	NM_022473 // ZFP106 // zinc finger protein 106 homolog (mouse) // 15q15.1 // 643
7989094	NEDD4	NM_006154 // NEDD4 // neural precursor cell expressed. developmentally down-regu
7989473	FAM148B	NM_001007595 // FAM148B // family with sequence similarity 148. member B // 15q2
7989611	FAM96A	NM_032231 // FAM96A // family with sequence similarity 96. member A // 15q22.31
7989849	DENND4A	NM_001144823 // DENND4A // DENN/MADD domain containing 4A // 15q22.31 // 10260 /
7989883	NA	---
7989885	DNAJB14	NM_001031723 // DNAJB14 // DnaJ (Hsp40) homolog. subfamily B. member 14 // 4q23
7989968	CALML4	NM_033429 // CALML4 // calmodulin-like 4 // 15q23 // 91860 /// NM_001031733 // C
7990033	TLE3	NM_005078 // TLE3 // transducin-like enhancer of split 3 (E(sp1) homolog. Drosop
7990429	C15orf17	NM_020447 // C15orf17 // chromosome 15 open reading frame 17 // 15q24.1 // 57184
7990436	COX5A	NM_004255 // COX5A // cytochrome c oxidase subunit Va // 15q24.1 // 9377 /// ENS
7990657	TBC1D2B	NM_144572 // TBC1D2B // TBC1 domain family. member 2B // 15q24.3-q25.1 // 23102
7990818	BCL2A1	NM_001114735 // BCL2A1 // BCL2-related protein A1 // 15q24.3 // 597 /// NM_00404
7991224	HAPLN3	NM_178232 // HAPLN3 // hyaluronan and proteoglycan link protein 3 // 15q26.1 //
7991357	AP3S2	NR_023361 // AP3S2 // adaptor-related protein complex 3. sigma 2 subunit // 15q2
7992685	KCTD5	NM_018992 // KCTD5 // potassium channel tetramerisation domain containing 5 // 1
7992795	THOC6	NM_024339 // THOC6 // THO complex 6 homolog (Drosophila) // 16p13.3 // 79228 ///
7992828	IL32	NM_001012631 // IL32 // interleukin 32 // 16p13.3 // 9235 /// NM_004221 // IL32
7992867	FLJ39639	AK096958 // FLJ39639 // hypothetical protein FLJ39639 // 16p13.3 // 283876 /// E
7993259	SNN	NM_003498 // SNN // stannin // 16p13 // 8303 /// ENST00000329565 // SNN // stann
7994131	PRKCB	NM_002738 // PRKCB // protein kinase C. beta // 16p11.2 // 5579 /// NM_212535 //
7994161	RBBP6	NM_006910 // RBBP6 // retinoblastoma binding protein 6 // 16p12.2 // 5930 /// NM
7994353	APOB48R	NM_018690 // APOB48R // apolipoprotein B48 receptor // 16p11 // 55911 /// ENST00
7994603	SPN	NM_001030288 // SPN // sialophorin // 16p11.2 // 6693 /// NM_003123 // SPN // si
7994655	C16orf53	NM_024516 // C16orf53 // chromosome 16 open reading frame 53 // 16p11.2 // 79447
7994769	CORO1A	NM_007074 // CORO1A // coronin. actin binding protein. 1A // 16p11.2 // 11151 //
7995017	STX4	NM_004604 // STX4 // syntaxin 4 // 16p11.2 // 6810 /// ENST00000313843 // STX4 /
7995033	ZNF646	NM_014699 // ZNF646 // zinc finger protein 646 // 16p11.2 // 9726 /// ENST000003
7995096	ITGAM	NM_001145808 // ITGAM // integrin. alpha M (complement component 3 receptor 3 su
7995242	C16orf67	BC021555 // C16orf67 // chromosome 16 open reading frame 67 // 16p11.2 // 100132
7995258	ZNF267	NM_003414 // ZNF267 // zinc finger protein 267 // 16p11.2 // 10308 /// ENST00000
7995448	TMEM188	NM_153261 // TMEM188 // transmembrane protein 188 // 16q12.1 // 255919 /// ENST0
7995539	NOD2	NM_022162 // NOD2 // nucleotide-binding oligomerization domain containing 2 // 1
7995552	CYLD	NM_015247 // CYLD // cylindromatosis (turban tumor syndrome) // 16q12.1 // 1540
7995697	LPCAT2	NM_017839 // LPCAT2 // lysophosphatidylcholine acyltransferase 2 // 16q12.2 // 5
7995783	MT2A	NM_005953 // MT2A // metallothionein 2A // 16q13 // 4502 /// ENST00000245185 //
7995787	MT1M	NM_176870 // MT1M // metallothionein 1M // 16q13 // 4499 /// ENST00000379818 //
7995793	MT1L	NR_001447 // MT1L // metallothionein 1L (gene/pseudogene) // 16q13 // 4500 /// X
7995803	MT1JP	AF348994 // MT1JP // metallothionein 1J (pseudogene) // 16q13 // 4498 /// BC1038
7995813	MT1DP	NR_027781 // MT1DP // metallothionein 1D (pseudogene) // 16q13 // 326343 /// NR_
7995838	MT1X	NM_005952 // MT1X // metallothionein 1X // 16q13 // 4501 /// ENST00000394485 //
7996290	CMTM1	NM_052999 // CMTM1 // CKLF-like MARVEL transmembrane domain containing 1 // 16q2
7996318	CMTM3	NM_144601 // CMTM3 // CKLF-like MARVEL transmembrane domain containing 3 // 16q2
7996345	CES2	NM_003869 // CES2 // carboxylesterase 2 (intestine. liver) // 16q22.1 // 8824 //
7996393	CBFB	NM_001755 // CBFB // core-binding factor. beta subunit // 16q22.1 // 865 /// NM_
7997453	PLCG2	NM_002661 // PLCG2 // phospholipase C. gamma 2 (phosphatidylinositol-specific) /
7997520	HSBP1	NM_001537 // HSBP1 // heat shock factor binding protein 1 // 16q23.3 // 3281 ///
7997556	LRRC50	NM_178452 // LRRC50 // leucine rich repeat containing 50 // 16q23.3-q24.1 // 123
7997746	JPH3	NM_020655 // JPH3 // junctophilin 3 // 16q24.3 // 57338 /// ENST00000284262 // J
7998940	MEFV	NM_000243 // MEFV // Mediterranean fever // 16p13.3 // 4210 /// ENST00000219596
7998978	ZNF597	NM_152457 // ZNF597 // zinc finger protein 597 // 16p13.3 // 146434 /// ENST0000
7999317	TMEM186	NM_015421 // TMEM186 // transmembrane protein 186 // 16p13.13-p12.3 // 25880 ///
7999553	CPPED1	NM_018340 // CPPED1 // calcineurin-like phosphoesterase domain containing 1 // 1
8000028	DCUN1D3	NM_173475 // DCUN1D3 // DCN1. defective in cullin neddylation 1. domain containi
8000409	HMGN2	NM_005517 // HMGN2 // high-mobility group nucleosomal binding domain 2 // 1p36.1
8000482	XPO6	NM_015171 // XPO6 // exportin 6 // 16p11.2 // 23214 /// ENST00000304658 // XPO6
8000567	IL27	NM_145659 // IL27 // interleukin 27 // --- // 246778 /// ENST00000356897 // IL27
8001317	N4BP1	NM_153029 // N4BP1 // NEDD4 binding protein 1 // 16q12.1 // 9683 /// ENST0000026
8001531	MT1G	NM_005950 // MT1G // metallothionein 1G // 16q13 // 4495 /// BC020757 // MT1G //
8001818	TK2	NM_004614 // TK2 // thymidine kinase 2. mitochondrial // 16q22-q23.1 // 7084 ///
8001981	FHOD1	NM_013241 // FHOD1 // formin homology 2 domain containing 1 // 16q22 // 29109 //
8002041	ATP6V0D1	NM_004691 // ATP6V0D1 // ATPase. H+ transporting. lysosomal 38kDa. V0 subunit d1
8002778	MLKL	NM_152649 // MLKL // mixed lineage kinase domain-like // 16q23.1 // 197259 /// N
8003171	COTL1	NM_021149 // COTL1 // coactosin-like 1 (Dictyostelium) // 16q24.1 // 23406 /// E
8003180	ZDHHC7	NM_001145548 // ZDHHC7 // zinc finger. DHHC-type containing 7 // 16q24.1 // 5562
8003298	SLC7A5	NM_003486 // SLC7A5 // solute carrier family 7 (cationic amino acid transporter.
8003348	RNF166	NM_178841 // RNF166 // ring finger protein 166 // 16q24.3 // 115992 /// ENST0000
8003639	WDR81	BC092513 // WDR81 // WD repeat domain 81 // 17p13.3 // 124997 /// AK298567 // WD
8003903	ARRB2	NM_004313 // ARRB2 // arrestin. beta 2 // 17p13 // 409 /// NM_199004 // ARRB2 //
8004030	RNF167	NM_015528 // RNF167 // ring finger protein 167 // 17p13.2 // 26001 /// ENST00000
8004043	ENO3	NM_001976 // ENO3 // enolase 3 (beta. muscle) // 17pter-p11 // 2027 /// NM_05301
8004184	XAF1	NM_017523 // XAF1 // XIAP associated factor 1 // 17p13.1 // 54739 /// NM_199139
8004247	C17orf49	NM_001142798 // C17orf49 // chromosome 17 open reading frame 49 // 17p13.1 // 12
8004671	KDM6B	NM_001080424 // KDM6B // lysine (K)-specific demethylase 6B // 17p13.1 // 23135
8005097	HS3ST3B1	NM_006041 // HS3ST3B1 // heparan sulfate (glucosamine) 3-O-sulfotransferase 3B1
8005512	PRPSAP2	NM_002767 // PRPSAP2 // phosphoribosyl pyrophosphate synthetase-associated prote
8005638	ALDH3A2	NM_001031806 // ALDH3A2 // aldehyde dehydrogenase 3 family. member A2 // 17p11.2
8005707	MAP2K3	NM_002756 // MAP2K3 // mitogen-activated protein kinase kinase 3 // 17q11.2 // 5
8005978	TRAF4	NM_004295 // TRAF4 // TNF receptor-associated factor 4 // 17q11-q12 // 9618 ///
8006214	ADAP2	NM_018404 // ADAP2 // ArfGAP with dual PH domains 2 // 17q11.2 // 55803 /// ENST
8006229	RNF135	NM_032322 // RNF135 // ring finger protein 135 // 17q11.2 // 84282 /// NM_197939
8006298	RAB11FIP4	NM_032932 // RAB11FIP4 // RAB11 family interacting protein 4 (class II) // 17q11
8006345	RHOT1	NM_001033568 // RHOT1 // ras homolog gene family. member T1 // 17q11.2 // 55288
8006409	CDK5R1	NM_003885 // CDK5R1 // cyclin-dependent kinase 5. regulatory subunit 1 (p35) //
8006531	SLFN5	NM_144975 // SLFN5 // schlafen family member 5 // 17q12 // 162394 /// ENST000002
8006594	CCL18	NM_002988 // CCL18 // chemokine (C-C motif) ligand 18 (pulmonary and activation-
8006602	CCL4	NM_002984 // CCL4 // chemokine (C-C motif) ligand 4 // 17q12 // 6351 /// AY76644
8006608	CCL4L1	NM_001001435 // CCL4L1 // chemokine (C-C motif) ligand 4-like 1 // 17q12 // 9560
8006621	CCL4L1	NM_001001435 // CCL4L1 // chemokine (C-C motif) ligand 4-like 1 // 17q12 // 9560
8006679	NA	---
8006834	NA	---
8006984	PSMD3	NM_002809 // PSMD3 // proteasome (prosome. macropain) 26S subunit. non-ATPase. 3
8006999	CSF3	NM_172220 // CSF3 // colony stimulating factor 3 (granulocyte) // 17q11.2-q12 //
8007023	MSL1	NM_001012241 // MSL1 // male-specific lethal 1 homolog (Drosophila) // 17q21.1 /
8007188	CNP	NM_033133 // CNP // 2'.3'-cyclic nucleotide 3' phosphodiesterase // 17q21 // 126
8007212	STAT5A	NM_003152 // STAT5A // signal transducer and activator of transcription 5A // 17
8007228	ATP6V0A1	NM_001130020 // ATP6V0A1 // ATPase. H+ transporting. lysosomal V0 subunit a1 //
8007290	MLX	NM_170607 // MLX // MAX-like protein X // 17q21.1 // 6945 /// NM_198204 // MLX /
8007446	IFI35	NM_005533 // IFI35 // interferon-induced protein 35 // 17q21 // 3430 /// ENST000
8007483	TMEM106A	NM_145041 // TMEM106A // transmembrane protein 106A // 17q21.31 // 113277 /// EN
8007594	TMUB2	NM_177441 // TMUB2 // transmembrane and ubiquitin-like domain containing 2 // 17
8007620	GRN	NM_002087 // GRN // granulin // 17q21.32 // 2896 /// ENST00000053867 // GRN // g
8007757	FMNL1	NM_005892 // FMNL1 // formin-like 1 // 17q21 // 752 /// ENST00000331495 // FMNL1
8008237	ITGA3	NM_002204 // ITGA3 // integrin. alpha 3 (antigen CD49C. alpha 3 subunit of VLA-3
8008598	PCTP	NM_001102402 // PCTP // phosphatidylcholine transfer protein // 17q21-q24 // 584
8008646	SCPEP1	NM_021626 // SCPEP1 // serine carboxypeptidase 1 // 17q22 // 59342 /// ENST00000
8008870	TMEM49	NM_030938 // TMEM49 // transmembrane protein 49 // 17q23.1 // 81671 /// ENST0000
8008922	PPM1D	NM_003620 // PPM1D // protein phosphatase 1D magnesium-dependent. delta isoform
8009243	C17orf60	NM_001085423 // C17orf60 // chromosome 17 open reading frame 60 // 17q23.3 // 28
8009502	KCNJ2	NM_000891 // KCNJ2 // potassium inwardly-rectifying channel. subfamily J. member
8009631	GPR142	NM_181790 // GPR142 // G protein-coupled receptor 142 // 17q25.1 // 350383 /// E
8009873	MYO15B	NR_003587 // MYO15B // myosin XVB pseudogene // 17q25.1 // 80022 /// AF418286 //
8010050	FAM100B	NM_182565 // FAM100B // family with sequence similarity 100. member B // 17q25.1
8010061	SPHK1	NM_182965 // SPHK1 // sphingosine kinase 1 // 17q25.2 // 8877 /// NM_021972 // S
8010212	TMC8	NM_152468 // TMC8 // transmembrane channel-like 8 // 17q25.3 // 147138 /// ENST0
8010770	SLC16A3	NM_001042422 // SLC16A3 // solute carrier family 16. member 3 (monocarboxylic ac
8011018	CRK	NM_016823 // CRK // v-crk sarcoma virus CT10 oncogene homolog (avian) // 17p13.3
8011093	SLC43A2	NM_152346 // SLC43A2 // solute carrier family 43. member 2 // 17p13.3 // 124935
8011480	CAMKK1	NM_032294 // CAMKK1 // calcium/calmodulin-dependent protein kinase kinase 1. alp
8011499	P2RX1	NM_002558 // P2RX1 // purinergic receptor P2X. ligand-gated ion channel. 1 // 17
8011713	CXCL16	NM_022059 // CXCL16 // chemokine (C-X-C motif) ligand 16 // 17p13 // 58191 /// N
8011747	SLC25A11	NM_003562 // SLC25A11 // solute carrier family 25 (mitochondrial carrier; oxoglu
8011774	CAMTA2	NM_015099 // CAMTA2 // calmodulin binding transcription activator 2 // 17p13.2 /
8011826	C17orf87	AY358809 // C17orf87 // chromosome 17 open reading frame 87 // 17p13.2 // 388325
8012099	PHF23	NM_024297 // PHF23 // PHD finger protein 23 // 17p13.1 // 79142 /// ENST00000320
8012270	NA	---
8012376	VAMP2	NM_014232 // VAMP2 // vesicle-associated membrane protein 2 (synaptobrevin 2) //
8012416	C17orf44	NR_026951 // C17orf44 // chromosome 17 open reading frame 44 // 17p13.1 // 28402
8013094	COPS3	NM_003653 // COPS3 // COP9 constitutive photomorphogenic homolog subunit 3 (Arab
8013486	USP22	NM_015276 // USP22 // ubiquitin specific peptidase 22 // 17p11.2 // 23326 /// EN
8013641	PIGS	NM_033198 // PIGS // phosphatidylinositol glycan anchor biosynthesis. class S //
8013671	SPAG5	NM_006461 // SPAG5 // sperm associated antigen 5 // 17q11.2 // 10615 /// ENST000
8013788	FLOT2	NM_004475 // FLOT2 // flotillin 2 // 17q11-q12 // 2319 /// ENST00000394908 // FL
8013923	GIT1	NM_001085454 // GIT1 // G protein-coupled receptor kinase interacting ArfGAP 1 /
8014037	CRLF3	NM_015986 // CRLF3 // cytokine receptor-like factor 3 // 17q11.2 // 51379 /// EN
8014066	EVI2A	NM_001003927 // EVI2A // ecotropic viral integration site 2A // 17q11.2 // 2123
8014257	SLFN12L	NM_001145027 // SLFN12L // schlafen family member 12-like // 17q12 // 342615 ///
8014361	CCL23	NM_005064 // CCL23 // chemokine (C-C motif) ligand 23 // 17q12 // 6368 /// NM_14
8014369	CCL3	NM_002983 // CCL3 // chemokine (C-C motif) ligand 3 // 17q11-q21 // 6348 /// ENS
8014891	IKZF3	NM_012481 // IKZF3 // IKAROS family zinc finger 3 (Aiolos) // 17q21 // 22806 ///
8015031	CCR7	NM_001838 // CCR7 // chemokine (C-C motif) receptor 7 // 17q12-q21.2 // 1236 ///
8015511	DHX58	NM_024119 // DHX58 // DEXH (Asp-Glu-X-His) box polypeptide 58 // 17q21.2 // 7913
8016215	ARHGAP27	NM_199282 // ARHGAP27 // Rho GTPase activating protein 27 // 17q21.31 // 201176
8016708	LRRC59	NM_018509 // LRRC59 // leucine rich repeat containing 59 // 17q21.33 // 55379 //
8016739	TOB1	NM_005749 // TOB1 // transducer of ERBB2. 1 // 17q21 // 10140 /// ENST0000026895
8016745	SPAG9	NM_001130528 // SPAG9 // sperm associated antigen 9 // 17q21.33 // 9043 /// NM_0
8016787	NA	---
8016847	TRIM25	NM_005082 // TRIM25 // tripartite motif-containing 25 // 17q23.2 // 7706 /// ENS
8017210	AP1S2	NM_003916 // AP1S2 // adaptor-related protein complex 1. sigma 2 subunit // Xp22
8017599	PECAM1	NM_000442 // PECAM1 // platelet/endothelial cell adhesion molecule // 17q23 // 5
8017671	LOC146880	NR_026899 // LOC146880 // hypothetical LOC146880 // 17q24 // 146880 /// NR_02748
8017843	SLC16A6	NM_004694 // SLC16A6 // solute carrier family 16. member 6 (monocarboxylic acid
8017964	ABCA6	NM_080284 // ABCA6 // ATP-binding cassette. sub-family A (ABC1). member 6 // 17q
8018169	CD300LB	NM_174892 // CD300LB // CD300 molecule-like family member b // 17q25.1 // 124599
8018177	CD300C	NM_006678 // CD300C // CD300c molecule // 17q25.1 // 10871 /// ENST00000330793 /
8018196	CD300LF	NM_139018 // CD300LF // CD300 molecule-like family member f // 17q25.1 // 146722
8018315	SUMO2	NM_006937 // SUMO2 // SMT3 suppressor of mif two 3 homolog 2 (S. cerevisiae) //
8018352	SLC25A19	NM_001126121 // SLC25A19 // solute carrier family 25 (mitochondrial thiamine pyr
8018439	H3F3B	NM_005324 // H3F3B // H3 histone. family 3B (H3.3B) // 17q25 // 3021 /// BX53737
8018902	DNAH17	ENST00000300671 // DNAH17 // dynein. axonemal. heavy chain 17 // 17q25.3 // 8632
8018966	TIMP2	NM_003255 // TIMP2 // TIMP metallopeptidase inhibitor 2 // 17q25 // 7077 /// ENS
8019183	ACTG1	NM_001614 // ACTG1 // actin. gamma 1 // 17q25 // 71 /// ENST00000331925 // ACTG1
8019486	SECTM1	NM_003004 // SECTM1 // secreted and transmembrane 1 // 17q25 // 6398 /// ENST000
8019622	TMEM106A	NM_145041 // TMEM106A // transmembrane protein 106A // 17q21.31 // 113277 /// EN
8019651	CCL4L1	NM_001001435 // CCL4L1 // chemokine (C-C motif) ligand 4-like 1 // 17q12 // 9560
8019912	EMILIN2	NM_032048 // EMILIN2 // elastin microfibril interfacer 2 // 18p11.3 // 84034 ///
8019954	FLJ35776	NR_024101 // FLJ35776 // hypothetical LOC649446 // 18p11.31 // 649446 /// ENST00
8020058	NDUFV2	NM_021074 // NDUFV2 // NADH dehydrogenase (ubiquinone) flavoprotein 2. 24kDa //
8020110	RAB31	NM_006868 // RAB31 // RAB31. member RAS oncogene family // 18p11.3 // 11031 ///
8020183	IMPA2	NM_014214 // IMPA2 // inositol(myo)-1(or 4)-monophosphatase 2 // 18p11.2 // 3613
8020702	TAF4B	NM_005640 // TAF4B // TAF4b RNA polymerase II. TATA box binding protein (TBP)-as
8021542	ZCCHC2	NM_017742 // ZCCHC2 // zinc finger. CCHC domain containing 2 // 18q21.33 // 5487
8021546	ZCCHC2	NM_017742 // ZCCHC2 // zinc finger. CCHC domain containing 2 // 18q21.33 // 5487
8021563	NA	---
8021653	SERPINB8	NM_002640 // SERPINB8 // serpin peptidase inhibitor. clade B (ovalbumin). member
8021984	YES1	NM_005433 // YES1 // v-yes-1 Yamaguchi sarcoma viral oncogene homolog 1 // 18p11
8023043	PSTPIP2	NM_024430 // PSTPIP2 // proline-serine-threonine phosphatase interacting protein
8023220	SMAD7	NM_005904 // SMAD7 // SMAD family member 7 // 18q21.1 // 4092 /// ENST0000026215
8023261	ACAA2	NM_006111 // ACAA2 // acetyl-Coenzyme A acyltransferase 2 // 18q21.1 // 10449 //
8023382	MBD2	NM_003927 // MBD2 // methyl-CpG binding domain protein 2 // 18q21 // 8932 /// NM
8023415	TCF4	NM_001083962 // TCF4 // transcription factor 4 // 18q21.1 // 6925 /// NM_003199
8024485	GADD45B	NM_015675 // GADD45B // growth arrest and DNA-damage-inducible. beta // 19p13.3
8024532	ZNF57	NM_173480 // ZNF57 // zinc finger protein 57 // 19p13.3 // 126295 /// ENST000003
8024582	S1PR4	NM_003775 // S1PR4 // sphingosine-1-phosphate receptor 4 // 19p13.3 // 8698 ///
8025058	TRIP10	NM_004240 // TRIP10 // thyroid hormone receptor interactor 10 // 19p13.3 // 9322
8025076	VAV1	NM_005428 // VAV1 // vav 1 guanine nucleotide exchange factor // 19p13.2 // 7409
8025103	EMR1	NM_001974 // EMR1 // egf-like module containing. mucin-like. hormone receptor-li
8025183	MCOLN1	NM_020533 // MCOLN1 // mucolipin 1 // 19p13.3-p13.2 // 57192 /// ENST00000264079
8025199	PNPLA6	NM_006702 // PNPLA6 // patatin-like phospholipase domain containing 6 // 19p13.3
8025255	STXBP2	NM_006949 // STXBP2 // syntaxin binding protein 2 // 19p13.3-p13.2 // 6813 /// N
8025285	C19orf59	NM_174918 // C19orf59 // chromosome 19 open reading frame 59 // 19p13.2 // 19967
8025368	SNAPC2	NM_003083 // SNAPC2 // small nuclear RNA activating complex. polypeptide 2. 45kD
8025551	C19orf66	NM_018381 // C19orf66 // chromosome 19 open reading frame 66 // 19p13.2 // 55337
8025601	ICAM1	NM_000201 // ICAM1 // intercellular adhesion molecule 1 // 19p13.3-p13.2 // 3383
8025612	ICAM4	NM_022377 // ICAM4 // intercellular adhesion molecule 4 (Landsteiner-Wiener bloo
8025877	LPPR2	NM_022737 // LPPR2 // lipid phosphate phosphatase-related protein type 2 // 19p1
8026106	CALR	NM_004343 // CALR // calreticulin // 19p13.3-p13.2 // 811 /// ENST00000316448 //
8026250	DCAF15	NM_138353 // DCAF15 // DDB1 and CUL4 associated factor 15 // 19p13.12 // 90379 /
8026315	PKN1	NM_213560 // PKN1 // protein kinase N1 // 19p13.1-p12 // 5585 /// NM_002741 // P
8026533	HSH2D	NM_032855 // HSH2D // hematopoietic SH2 domain containing // 19p13.12 // 84941 /
8026564	KLF2	NM_016270 // KLF2 // Kruppel-like factor 2 (lung) // 19p13.13-p13.11 // 10365 //
8026638	MYO9B	NM_004145 // MYO9B // myosin IXB // 19p13.1 // 4650 /// NM_001130065 // MYO9B //
8026926	MAST3	NM_015016 // MAST3 // microtubule associated serine/threonine kinase 3 // 19p13.
8026971	IFI30	NM_006332 // IFI30 // interferon. gamma-inducible protein 30 // 19p13.1 // 10437
8027169	GATAD2A	NM_017660 // GATAD2A // GATA zinc finger domain containing 2A // 19p13.11 // 548
8027233	ZNF101	NM_033204 // ZNF101 // zinc finger protein 101 // 19p13.11 // 94039 /// ENST0000
8027398	PLEKHF1	NM_024310 // PLEKHF1 // pleckstrin homology domain containing. family F (with FY
8027701	GRAMD1A	NM_020895 // GRAMD1A // GRAM domain containing 1A // 19q13.11-q13.12 // 57655 //
8027719	SCN1B	NM_001037 // SCN1B // sodium channel. voltage-gated. type I. beta // 19q13.1 //
8027862	FFAR2	NM_005306 // FFAR2 // free fatty acid receptor 2 // 19q13.1 // 2867 /// ENST0000
8028002	NA	---
8028172	CAPNS1	NM_001749 // CAPNS1 // calpain. small subunit 1 // 19q13.12 // 826 /// NM_001003
8028851	SHKBP1	NM_138392 // SHKBP1 // SH3KBP1 binding protein 1 // 19q13.2 // 92799 /// ENST000
8029065	BCKDHA	NM_000709 // BCKDHA // branched chain keto acid dehydrogenase E1. alpha polypept
8029107	CEACAM3	NM_001815 // CEACAM3 // carcinoembryonic antigen-related cell adhesion molecule
8029580	RELB	NM_006509 // RELB // v-rel reticuloendotheliosis viral oncogene homolog B // 19q
8029907	C5AR1	NM_001736 // C5AR1 // complement component 5a receptor 1 // 19q13.3-q13.4 // 728
8029914	GPR77	NM_018485 // GPR77 // G protein-coupled receptor 77 // 19q13.33 // 27202 /// ENS
8029918	DHX34	NM_014681 // DHX34 // DEAH (Asp-Glu-Ala-His) box polypeptide 34 // 19q13.3 // 97
8030470	AP2A1	NM_014203 // AP2A1 // adaptor-related protein complex 2. alpha 1 subunit // 19q1
8030782	SIGLEC9	NM_014441 // SIGLEC9 // sialic acid binding Ig-like lectin 9 // 19q13.41 // 2718
8030866	FPR3	NM_002030 // FPR3 // formyl peptide receptor 3 // 19q13.3-q13.4 // 2359 /// ENST
8030991	LOC147804	NR_003148 // LOC147804 // tropomyosin 3 pseudogene // 19q13.42 // 147804 /// NR_
8031047	MYADM	NM_001020818 // MYADM // myeloid-associated differentiation marker // 19q13.42 /
8031207	LILRA2	NM_001130917 // LILRA2 // leukocyte immunoglobulin-like receptor. subfamily A (w
8031213	LILRA1	NM_006863 // LILRA1 // leukocyte immunoglobulin-like receptor. subfamily A (with
8031784	ZNF134	NM_003435 // ZNF134 // zinc finger protein 134 // 19q13.4 // 7693 /// ENST000003
8032410	MOBKL2A	NM_130807 // MOBKL2A // MOB1. Mps One Binder kinase activator-like 2A (yeast) //
8032670	APBA3	NM_004886 // APBA3 // amyloid beta (A4) precursor protein-binding. family A. mem
8032899	TICAM1	NM_182919 // TICAM1 // toll-like receptor adaptor molecule 1 // 19p13.3 // 14802
8032909	PLIN3	NM_005817 // PLIN3 // perilipin 3 // 19p13.3 // 10226 /// ENST00000221957 // PLI
8033257	C3	NM_000064 // C3 // complement component 3 // 19p13.3-p13.2 // 718 /// ENST000002
8033300	GPR108	NM_001080452 // GPR108 // G protein-coupled receptor 108 // 19p13.3 // 56927 ///
8033319	SH2D3A	NM_005490 // SH2D3A // SH2 domain containing 3A // 19p13.3 // 10045 /// ENST0000
8033605	MYO1F	NM_012335 // MYO1F // myosin IF // 19p13.3-p13.2 // 4542 /// ENST00000338257 //
8033746	ZNF699	NM_198535 // ZNF699 // zinc finger protein 699 // 19p13.2 // 374879 /// ENST0000
8034199	TSPAN16	NM_012466 // TSPAN16 // tetraspanin 16 // 19p13.2 // 26526 /// ENST00000316737 /
8034631	STX10	NM_003765 // STX10 // syntaxin 10 // 19p13.2 // 8677 /// ENST00000242770 // STX1
8034762	PRKACA	NM_002730 // PRKACA // protein kinase. cAMP-dependent. catalytic. alpha // 19p13
8034851	EMR3	NM_032571 // EMR3 // egf-like module containing. mucin-like. hormone receptor-li
8035177	SLC35E1	NM_024881 // SLC35E1 // solute carrier family 35. member E1 // 19p13.11 // 79939
8035193	C19orf42	NM_024104 // C19orf42 // chromosome 19 open reading frame 42 // 19p13.11 // 7908
8035304	BST2	NM_004335 // BST2 // bone marrow stromal cell antigen 2 // 19p13.2 // 684 /// EN
8035456	LRRC25	NM_145256 // LRRC25 // leucine rich repeat containing 25 // 19p13.11 // 126364 /
8035566	HOMER3	NM_004838 // HOMER3 // homer homolog 3 (Drosophila) // 19p13.11 // 9454 /// NR_0
8035714	GMIP	NM_016573 // GMIP // GEM interacting protein // 19p12-p11 // 51291 /// ENST00000
8036207	NFKBID	NM_139239 // NFKBID // nuclear factor of kappa light polypeptide gene enhancer i
8036224	TYROBP	NM_003332 // TYROBP // TYRO protein tyrosine kinase binding protein // 19q13.1 /
8036503	RASGRP4	NM_170604 // RASGRP4 // RAS guanyl releasing protein 4 // 19q13.1 // 115727 ///
8036808	PRR13	NM_018457 // PRR13 // proline rich 13 // 12q12 // 54458 /// NM_001005354 // PRR1
8036908	SERTAD3	NM_013368 // SERTAD3 // SERTA domain containing 3 // 19q13.2 // 29946 /// NM_203
8037152	GSK3A	NM_019884 // GSK3A // glycogen synthase kinase 3 alpha // 19q13.2 // 2931 /// EN
8037374	PLAUR	NM_002659 // PLAUR // plasminogen activator. urokinase receptor // 19q13 // 5329
8037387	NA	---
8037389	C19orf61	NM_019108 // C19orf61 // chromosome 19 open reading frame 61 // 19q13.31 // 5600
8037621	EML2	NM_012155 // EML2 // echinoderm microtubule associated protein like 2 // 19q13.3
8037814	NA	---
8037835	SLC1A5	NM_005628 // SLC1A5 // solute carrier family 1 (neutral amino acid transporter).
8037970	PLA2G4C	NM_003706 // PLA2G4C // phospholipase A2. group IVC (cytosolic. calcium-independ
8038029	CARD8	NM_014959 // CARD8 // caspase recruitment domain family. member 8 // 19q13.33 //
8038487	IL4I1	NM_172374 // IL4I1 // interleukin 4 induced 1 // 19q13.3-q13.4 // 259307 /// NM_
8038547	NAPSB	NR_002798 // NAPSB // napsin B aspartic peptidase pseudogene // 19q13.33 // 2562
8038824	SIGLEC10	NM_033130 // SIGLEC10 // sialic acid binding Ig-like lectin 10 // 19q13.3 // 897
8038890	HAS1	NM_001523 // HAS1 // hyaluronan synthase 1 // 19q13.4 // 3036 /// ENST0000022211
8038899	FPR1	NM_002029 // FPR1 // formyl peptide receptor 1 // 19q13.4 // 2357 /// ENST000003
8039068	NDUFV2	NM_021074 // NDUFV2 // NADH dehydrogenase (ubiquinone) flavoprotein 2. 24kDa //
8039096	NLRP12	NM_144687 // NLRP12 // NLR family. pyrin domain containing 12 // 19q13.42 // 916
8039166	MBOAT7	NM_024298 // MBOAT7 // membrane bound O-acyltransferase domain containing 7 // 1
8039196	LILRB3	NM_001081450 // LILRB3 // leukocyte immunoglobulin-like receptor. subfamily B (w
8039212	LILRB2	NM_005874 // LILRB2 // leukocyte immunoglobulin-like receptor. subfamily B (with
8039269	LENG9	NM_198988 // LENG9 // leukocyte receptor cluster (LRC) member 9 // 19q13.4 // 94
8039692	ZNF814	NM_001144989 // ZNF814 // zinc finger protein 814 // 19q13.43 // 730051 /// NM_0
8039905	TMEM167B	NM_020141 // TMEM167B // transmembrane protein 167B // 1p13.3 // 56900 /// ENST0
8040080	RSAD2	NM_080657 // RSAD2 // radical S-adenosyl methionine domain containing 2 // 2p25.
8040103	ID2	NM_002166 // ID2 // inhibitor of DNA binding 2. dominant negative helix-loop-hel
8040278	PQLC3	NM_152391 // PQLC3 // PQ loop repeat containing 3 // 2p25.1 // 130814 /// ENST00
8040618	RAB10	NM_016131 // RAB10 // RAB10. member RAS oncogene family // 2p23.3 // 10890 /// E
8040908	SNX17	NM_014748 // SNX17 // sorting nexin 17 // 2p23-p22 // 9784 /// ENST00000233575 /
8041197	YPEL5	NM_001127401 // YPEL5 // yippee-like 5 (Drosophila) // 2p23.1 // 51646 /// NM_00
8041447	CRIM1	NM_016441 // CRIM1 // cysteine rich transmembrane BMP regulator 1 (chordin-like)
8041508	QPCT	NM_012413 // QPCT // glutaminyl-peptide cyclotransferase // 2p22.2 // 25797 ///
8041826	TTC7A	NM_020458 // TTC7A // tetratricopeptide repeat domain 7A // 2p21 // 57217 /// EN
8042144	REL	NM_002908 // REL // v-rel reticuloendotheliosis viral oncogene homolog (avian) /
8042211	B3GNT2	NM_006577 // B3GNT2 // UDP-GlcNAc:betaGal beta-1.3-N-acetylglucosaminyltransfera
8042503	MXD1	NM_002357 // MXD1 // MAX dimerization protein 1 // 2p13-p12 // 4084 /// ENST0000
8042519	PCYOX1	NM_016297 // PCYOX1 // prenylcysteine oxidase 1 // 2p13.3 // 51449 /// ENST00000
8042576	NAGK	NM_017567 // NAGK // N-acetylglucosamine kinase // 2p13.3 // 55577 /// ENST00000
8042637	DYSF	NM_001130978 // DYSF // dysferlin. limb girdle muscular dystrophy 2B (autosomal
8042811	TET3	NM_144993 // TET3 // tet oncogene family member 3 // 2p13.1 // 200424 /// ENST00
8043187	MAT2A	NM_005911 // MAT2A // methionine adenosyltransferase II. alpha // 2p11.2 // 4144
8043621	ARID5A	NM_212481 // ARID5A // AT rich interactive domain 5A (MRF1-like) // 2q11.2 // 10
8043630	UNQ5814	AY358167 // UNQ5814 // RFVG5814 // 2q11.2 // 100132284 /// ENST00000454558 // AR
8043743	NA	---
8043945	MAP4K4	NM_145686 // MAP4K4 // mitogen-activated protein kinase kinase kinase kinase 4 /
8043981	IL1R2	NM_004633 // IL1R2 // interleukin 1 receptor. type II // 2q12-q22 // 7850 /// NM
8044391	MERTK	NM_006343 // MERTK // c-mer proto-oncogene tyrosine kinase // 2q14.1 // 10461 //
8044417	TMEM87B	NM_032824 // TMEM87B // transmembrane protein 87B // 2q13 // 84910 /// ENST00000
8044541	IL1F9	NM_019618 // IL1F9 // interleukin 1 family. member 9 // 2q12-q21 // 56300 /// EN
8044574	IL1RN	NM_173842 // IL1RN // interleukin 1 receptor antagonist // 2q14.2 // 3557 /// NM
8044919	RALB	NM_002881 // RALB // v-ral simian leukemia viral oncogene homolog B (ras related
8045182	PTPN18	NM_014369 // PTPN18 // protein tyrosine phosphatase. non-receptor type 18 (brain
8045514	SPOPL	NM_001001664 // SPOPL // speckle-type POZ protein-like // 2q22.1 // 339745 /// E
8045688	TNFAIP6	NM_007115 // TNFAIP6 // tumor necrosis factor. alpha-induced protein 6 // 2q23.3
8046003	GCA	NM_012198 // GCA // grancalcin. EF-hand calcium binding protein // 2q24.2 // 258
8046124	DHRS9	NM_005771 // DHRS9 // dehydrogenase/reductase (SDR family) member 9 // 2q31.1 //
8046333	CYBRD1	NM_024843 // CYBRD1 // cytochrome b reductase 1 // 2q31.1 // 79901 /// NM_001127
8046461	ZAK	NM_133646 // ZAK // sterile alpha motif and leucine zipper containing kinase AZK
8046604	AGPS	NM_003659 // AGPS // alkylglycerone phosphate synthase // 2q31.2 // 8540 /// ENS
8046726	SSFA2	NM_001130445 // SSFA2 // sperm specific antigen 2 // 2q31.3 // 6744 /// NM_00675
8047059	HNRNPC	NM_031314 // HNRNPC // heterogeneous nuclear ribonucleoprotein C (C1/C2) // 14q1
8047125	NA	---
8047381	CFLAR	NM_003879 // CFLAR // CASP8 and FADD-like apoptosis regulator // 2q33-q34 // 883
8047401	NA	---
8047403	CASP10	NM_032977 // CASP10 // caspase 10. apoptosis-related cysteine peptidase // 2q33-
8047692	CTLA4	NM_005214 // CTLA4 // cytotoxic T-lymphocyte-associated protein 4 // 2q33 // 149
8047702	ICOS	NM_012092 // ICOS // inducible T-cell co-stimulator // 2q33 // 29851 /// ENST000
8047738	NRP2	NM_201266 // NRP2 // neuropilin 2 // 2q33.3 // 8828 /// NM_003872 // NRP2 // neu
8047763	NA	---
8048227	IL8RB	NM_001557 // IL8RB // interleukin 8 receptor. beta // 2q35 // 3579 /// ENST00000
8048283	SLC11A1	NM_000578 // SLC11A1 // solute carrier family 11 (proton-coupled divalent metal
8048304	CTDSP1	NM_021198 // CTDSP1 // CTD (carboxy-terminal domain. RNA polymerase II. polypept
8048432	CYP27A1	NM_000784 // CYP27A1 // cytochrome P450. family 27. subfamily A. polypeptide 1 /
8048717	SGPP2	NM_152386 // SGPP2 // sphingosine-1-phosphate phosphotase 2 // 2q36.1 // 130367
8048723	NA	---
8048898	SP140	NM_007237 // SP140 // SP140 nuclear body protein // 2q37.1 // 11262 /// NM_00100
8048940	SP100	NM_001080391 // SP100 // SP100 nuclear antigen // 2q37.1 // 6672 /// NM_003113 /
8048976	NA	---
8049271	ATG16L1	NM_030803 // ATG16L1 // ATG16 autophagy related 16-like 1 (S. cerevisiae) // 2q3
8049512	LRRFIP1	NM_001137552 // LRRFIP1 // leucine rich repeat (in FLII) interacting protein 1 /
8050102	CMPK2	NM_207315 // CMPK2 // cytidine monophosphate (UMP-CMP) kinase 2. mitochondrial /
8050213	NA	---
8050427	FAM49A	NM_030797 // FAM49A // family with sequence similarity 49. member A // 2p24.2 //
8050548	LAPTM4A	NM_014713 // LAPTM4A // lysosomal protein transmembrane 4 alpha // 2p24.1 // 974
8051215	RBKS	NM_022128 // RBKS // ribokinase // 2p23.3 // 64080 /// ENST00000302188 // RBKS /
8051396	NLRC4	NM_021209 // NLRC4 // NLR family. CARD domain containing 4 // 2p22-p21 // 58484
8051501	EIF2AK2	NM_002759 // EIF2AK2 // eukaryotic translation initiation factor 2-alpha kinase
8051583	CYP1B1	NM_000104 // CYP1B1 // cytochrome P450. family 1. subfamily B. polypeptide 1 //
8051637	DHX57	NM_198963 // DHX57 // DEAH (Asp-Glu-Ala-Asp/His) box polypeptide 57 // 2p22.1 //
8052010	CALM2	NM_001743 // CALM2 // calmodulin 2 (phosphorylase kinase. delta) // 2p21 // 805
8052331	PNPT1	NM_033109 // PNPT1 // polyribonucleotide nucleotidyltransferase 1 // 2p15 // 871
8052399	BCL11A	NM_022893 // BCL11A // B-cell CLL/lymphoma 11A (zinc finger protein) // 2p16.1 /
8052622	LOC388955	NR_003131 // LOC388955 // PX19 protein pseudogene // 2p15 // 388955
8052654	PELI1	NM_020651 // PELI1 // pellino homolog 1 (Drosophila) // 2p13.3 // 57162 /// ENST
8052925	TEX261	NM_144582 // TEX261 // testis expressed 261 // 2p13.3 // 113419 /// ENST00000272
8053187	PCGF1	NM_032673 // PCGF1 // polycomb group ring finger 1 // 2p13.1 // 84759 /// ENST00
8053388	TGOLN2	NM_006464 // TGOLN2 // trans-golgi network protein 2 // 2p11.2 // 10618 /// ENST
8053733	SETD8	NM_020382 // SETD8 // SET domain containing (lysine methyltransferase) 8 // 12q2
8053882	DUSP2	NM_004418 // DUSP2 // dual specificity phosphatase 2 // 2q11 // 1844 /// ENST000
8053901	TMEM127	NM_017849 // TMEM127 // transmembrane protein 127 // 2q11.2 // 55654 /// ENST000
8054004	SEMA4C	NM_017789 // SEMA4C // sema domain. immunoglobulin domain (Ig). transmembrane do
8054354	NA	---
8054395	UXS1	NM_025076 // UXS1 // UDP-glucuronate decarboxylase 1 // 2q12.2 // 80146 /// ENST
8054722	IL1B	NM_000576 // IL1B // interleukin 1. beta // 2q14 // 3553 /// ENST00000263341 //
8054804	CCDC93	NM_019044 // CCDC93 // coiled-coil domain containing 93 // 2q14.1 // 54520 /// E
8054862	TMEM185B	NR_000034 // TMEM185B // transmembrane protein 185B (pseudogene) // 2q14.2 // 79
8054997	MAP3K2	NM_006609 // MAP3K2 // mitogen-activated protein kinase kinase kinase 2 // 2q14.
8055697	RBM43	NM_198557 // RBM43 // RNA binding motif protein 43 // 2q23.3 // 375287 /// ENST0
8055702	NMI	NM_004688 // NMI // N-myc (and STAT) interactor // 2q23 // 9111 /// ENST00000243
8055952	NR4A2	NM_006186 // NR4A2 // nuclear receptor subfamily 4. group A. member 2 // 2q22-q2
8056102	CD302	NM_014880 // CD302 // CD302 molecule // 2q24.2 // 9936 /// ENST00000259053 // CD
8056285	IFIH1	NM_022168 // IFIH1 // interferon induced with helicase C domain 1 // 2q24 // 641
8056837	GPR155	NM_001033045 // GPR155 // G protein-coupled receptor 155 // 2q31.1 // 151556 ///
8057439	NA	---
8057744	STAT1	NM_007315 // STAT1 // signal transducer and activator of transcription 1. 91kDa
8057771	STAT4	NM_003151 // STAT4 // signal transducer and activator of transcription 4 // 2q32
8057959	PGAP1	NM_024989 // PGAP1 // post-GPI attachment to proteins 1 // 2q33.1 // 80055 /// E
8058197	NA	---
8058390	RAPH1	NM_213589 // RAPH1 // Ras association (RalGDS/AF-6) and pleckstrin homology doma
8058514	NA	---
8058552	IDH1	NM_005896 // IDH1 // isocitrate dehydrogenase 1 (NADP+). soluble // 2q33.3 // 34
8058824	MREG	NM_018000 // MREG // melanoregulin // 2q35 // 55686 /// ENST00000263268 // MREG
8058905	IL8RA	NM_000634 // IL8RA // interleukin 8 receptor. alpha // 2q35 // 3577 /// ENST0000
8059097	C2orf24	NM_015680 // C2orf24 // chromosome 2 open reading frame 24 // 2q35 // 27013 ///
8059177	TUBA4A	NM_006000 // TUBA4A // tubulin. alpha 4a // 2q35 // 7277 /// ENST00000248437 //
8059350	AP1S3	NM_001039569 // AP1S3 // adaptor-related protein complex 1. sigma 3 subunit // 2
8059650	SP110	NM_080424 // SP110 // SP110 nuclear body protein // 2q37.1 // 3431 /// NM_004509
8060627	ATRN	NM_139321 // ATRN // attractin // 20p13 // 8455 /// NM_139322 // ATRN // attract
8060758	PRNP	NM_000311 // PRNP // prion protein // 20p13 // 5621 /// NM_183079 // PRNP // pri
8060988	BTBD3	NM_014962 // BTBD3 // BTB (POZ) domain containing 3 // 20p12.2 // 22903 /// NM_1
8061073	NA	---
8061373	GZF1	NM_022482 // GZF1 // GDNF-inducible zinc finger protein 1 // 20p12.3-p11.21 // 6
8061668	HCK	NM_002110 // HCK // hemopoietic cell kinase // 20q11-q12 // 3055 /// ENST0000026
8062023	MAP1LC3A	NM_032514 // MAP1LC3A // microtubule-associated protein 1 light chain 3 alpha //
8062041	ACSS2	NM_018677 // ACSS2 // acyl-CoA synthetase short-chain family member 2 // 20q11.2
8062326	C20orf24	NR_026562 // C20orf24 // chromosome 20 open reading frame 24 // 20q11.23 // 5596
8062377	SRC	NM_005417 // SRC // v-src sarcoma (Schmidt-Ruppin A-2) viral oncogene homolog (a
8063156	CD40	NM_001250 // CD40 // CD40 molecule. TNF receptor superfamily member 5 // 20q12-q
8063313	NA	---
8063351	SLC9A8	NM_015266 // SLC9A8 // solute carrier family 9 (sodium/hydrogen exchanger). memb
8063394	PTPN1	NM_002827 // PTPN1 // protein tyrosine phosphatase. non-receptor type 1 // 20q13
8063497	CASS4	NM_020356 // CASS4 // Cas scaffolding protein family member 4 // 20q13.2-q13.31
8063526	C20orf106	NM_001012971 // C20orf106 // chromosome 20 open reading frame 106 // 20q13.31 //
8063873	OSBPL2	NM_144498 // OSBPL2 // oxysterol binding protein-like 2 // 20q13.3 // 9885 /// N
8063923	SLCO4A1	NM_016354 // SLCO4A1 // solute carrier organic anion transporter family. member
8064191	TPD52L2	NM_199360 // TPD52L2 // tumor protein D52-like 2 // 20q13.2-q13.3 // 7165 /// NM
8064451	SIRPB2	NM_001122962 // SIRPB2 // signal-regulatory protein beta 2 // 20p13 // 284759 //
8064471	SIRPB1	NM_006065 // SIRPB1 // signal-regulatory protein beta 1 // 20p13 // 10326 /// NM
8064539	CPXM1	NM_019609 // CPXM1 // carboxypeptidase X (M14 family). member 1 // 20p13-p12.3 /
8064637	C20orf194	NM_001009984 // C20orf194 // chromosome 20 open reading frame 194 // 20p13 // 25
8064766	RNF24	NM_001134338 // RNF24 // ring finger protein 24 // 20p13-p12.1 // 11237 /// NM_0
8064868	RP5-1022P6.2	NM_019593 // RP5-1022P6.2 // hypothetical protein KIAA1434 // 20p12.3 // 56261 /
8064879	TRMT6	NM_015939 // TRMT6 // tRNA methyltransferase 6 homolog (S. cerevisiae) // 20p12.
8065280	C20orf74	NM_020343 // C20orf74 // chromosome 20 open reading frame 74 // 20p11.22 // 5718
8065334	NKX2-2	NM_002509 // NKX2-2 // NK2 homeobox 2 // 20pter-q11.23 // 4821 /// ENST000003771
8065353	THBD	NM_000361 // THBD // thrombomodulin // 20p11.2 // 7056 /// ENST00000377103 // TH
8065403	CST3	NM_000099 // CST3 // cystatin C // 20p11.21 // 1471 /// ENST00000398409 // CST3
8065444	ACSS1	NM_032501 // ACSS1 // acyl-CoA synthetase short-chain family member 1 // 20p11.2
8065612	C20orf112	NM_080616 // C20orf112 // chromosome 20 open reading frame 112 // 20q11.1-q11.23
8066417	SERINC3	NM_006811 // SERINC3 // serine incorporator 3 // 20q13.1-q13.3 // 10955 /// NM_1
8066431	ADA	NM_000022 // ADA // adenosine deaminase // 20q12-q13.11 // 100 /// ENST000003728
8066716	ELMO2	NM_133171 // ELMO2 // engulfment and cell motility 2 // 20q13 // 63916 /// NM_18
8066848	PREX1	NM_020820 // PREX1 // phosphatidylinositol-3.4.5-trisphosphate-dependent Rac exc
8066905	ZNFX1	NM_021035 // ZNFX1 // zinc finger. NFX1-type containing 1 // 20q13.13 // 57169 /
8066939	B4GALT5	NM_004776 // B4GALT5 // UDP-Gal:betaGlcNAc beta 1.4- galactosyltransferase. poly
8067221	ZBP1	NM_030776 // ZBP1 // Z-DNA binding protein 1 // 20q13.31 // 81030 /// NM_0011604
8067279	CTSZ	NM_001336 // CTSZ // cathepsin Z // 20q13 // 1522 /// ENST00000217131 // CTSZ //
8067546	hCG_2018279	NR_024470 // hCG_2018279 // hypothetical protein LOC100127888 // 20q13.33 // 100
8067680	PRIC285	NM_001037335 // PRIC285 // peroxisomal proliferator-activated receptor A interac
8068100	NCRNA00189	AF490769 // NCRNA00189 // non-protein coding RNA 189 // 21q22.11 // 193629 /// B
8068105	BACH1	NR_027655 // BACH1 // BTB and CNC homology 1. basic leucine zipper transcription
8068254	IL10RB	NM_000628 // IL10RB // interleukin 10 receptor. beta // 21q22.1-q22.2|21q22.11 /
8068353	SLC5A3	NM_006933 // SLC5A3 // solute carrier family 5 (sodium/myo-inositol cotransporte
8068361	SLC5A3	NM_006933 // SLC5A3 // solute carrier family 5 (sodium/myo-inositol cotransporte
8068422	DOPEY2	NM_005128 // DOPEY2 // dopey family member 2 // 21q22.2 // 9980 /// ENST00000399
8068593	ETS2	NM_005239 // ETS2 // v-ets erythroblastosis virus E26 oncogene homolog 2 (avian)
8068697	MX2	NM_002463 // MX2 // myxovirus (influenza virus) resistance 2 (mouse) // 21q22.3
8068713	MX1	NM_002462 // MX1 // myxovirus (influenza virus) resistance 1. interferon-inducib
8069532	HSPA13	NM_006948 // HSPA13 // heat shock protein 70kDa family. member 13 // 21q11.1|21q
8069541	SAMSN1	NM_022136 // SAMSN1 // SAM domain. SH3 domain and nuclear localization signals 1
8069574	C21orf91	NM_001100420 // C21orf91 // chromosome 21 open reading frame 91 // 21q21.1 // 54
8069880	TIAM1	NM_003253 // TIAM1 // T-cell lymphoma invasion and metastasis 1 // 21q22.1|21q22
8070701	CSTB	NM_000100 // CSTB // cystatin B (stefin B) // 21q22.3 // 1476 /// ENST0000029156
8070720	ICOSLG	NM_015259 // ICOSLG // inducible T-cell co-stimulator ligand // 21q22.3 // 23308
8070819	PTTG1IP	NM_004339 // PTTG1IP // pituitary tumor-transforming 1 interacting protein // 21
8070826	ITGB2	NM_000211 // ITGB2 // integrin. beta 2 (complement component 3 receptor 3 and 4
8070912	SLC19A1	NM_194255 // SLC19A1 // solute carrier family 19 (folate transporter). member 1
8070961	LSS	NM_002340 // LSS // lanosterol synthase (2.3-oxidosqualene-lanosterol cyclase) /
8071069	IL17RA	NM_014339 // IL17RA // interleukin 17 receptor A // 22q11.1 // 23765 /// ENST000
8071134	C22orf37	ENST00000444596 // C22orf37 // chromosome 22 open reading frame 37 // 22q11.21 /
8071155	USP18	NM_017414 // USP18 // ubiquitin specific peptidase 18 // 22q11.21 // 11274 /// E
8071899	ADORA2A	NM_000675 // ADORA2A // adenosine A2a receptor // 22q11.23 // 135 /// ENST000003
8071907	UPB1	NM_016327 // UPB1 // ureidopropionase. beta // 22q11.2 // 51733 /// ENST00000326
8072015	ADRBK2	NM_005160 // ADRBK2 // adrenergic. beta. receptor kinase 2 // 22q11|22q12.1 // 1
8072577	YWHAH	NM_003405 // YWHAH // tyrosine 3-monooxygenase/tryptophan 5-monooxygenase activa
8072710	APOL6	NM_030641 // APOL6 // apolipoprotein L. 6 // 22q12.3 // 80830 /// ENST0000040965
8072735	APOL1	NM_145343 // APOL1 // apolipoprotein L. 1 // 22q13.1 // 8542 /// NM_003661 // AP
8072798	CYTH4	NM_013385 // CYTH4 // cytohesin 4 // 22q12.3-q13.1 // 27128 /// ENST00000248901
8072883	NOL12	NM_024313 // NOL12 // nucleolar protein 12 // 22q13.1 // 79159 /// ENST000003591
8073345	EP300	NM_001429 // EP300 // E1A binding protein p300 // 22q13.2 // 2033 /// ENST000002
8073682	PARVG	NM_022141 // PARVG // parvin. gamma // 22q13.2-q13 // 64098 /// NM_001137605 //
8073890	GRAMD4	NM_015124 // GRAMD4 // GRAM domain containing 4 // 22q13.31 // 23151 /// ENST000
8073960	PIM3	NM_001001852 // PIM3 // pim-3 oncogene // 22q13 // 415116 /// ENST00000360612 //
8074606	USP18	NM_017414 // USP18 // ubiquitin specific peptidase 18 // 22q11.21 // 11274 /// E
8074791	MAPK1	NM_002745 // MAPK1 // mitogen-activated protein kinase 1 // 22q11.2|22q11.21 //
8074806	PPM1F	NM_014634 // PPM1F // protein phosphatase 1F (PP2C domain containing) // 22q11.2
8075005	ADORA2A	AK289871 // ADORA2A // adenosine A2a receptor // 22q11.23 // 135 /// AK091970 //
8075182	XBP1	NM_005080 // XBP1 // X-box binding protein 1 // 22q12.1|22q12 // 7494 /// NM_001
8075316	OSM	NM_020530 // OSM // oncostatin M // 22q12.2 // 5008 /// ENST00000215781 // OSM /
8075332	TBC1D10A	NM_031937 // TBC1D10A // TBC1 domain family. member 10A // 22q12.1-qter // 83874
8075430	MORC2	NM_014941 // MORC2 // MORC family CW-type zinc finger 2 // 22q12.2 // 22880 ///
8075481	NA	---
8075720	APOL2	NM_030882 // APOL2 // apolipoprotein L. 2 // 22q12 // 23780 /// NM_145637 // APO
8075906	SSTR3	NM_001051 // SSTR3 // somatostatin receptor 3 // 22q13.1 // 6753 /// ENST0000032
8075956	LGALS2	NM_006498 // LGALS2 // lectin. galactoside-binding. soluble. 2 // 22q12-q13|22q1
8076137	UNC84B	NM_015374 // UNC84B // unc-84 homolog B (C. elegans) // 22q13.1 // 25777 /// ENS
8076403	NAGA	NM_000262 // NAGA // N-acetylgalactosaminidase. alpha- // 22q13-qter|22q11 // 46
8076441	NFAM1	NM_145912 // NFAM1 // NFAT activating protein with ITAM motif 1 // 22q13.2 // 15
8076792	CERK	NM_022766 // CERK // ceramide kinase // 22q13.31 // 64781 /// ENST00000216264 //
8077103	TYMP	NM_001113756 // TYMP // thymidine phosphorylase // 22q13|22q13.33 // 1890 /// NM
8077595	BRPF1	NM_001003694 // BRPF1 // bromodomain and PHD finger containing. 1 // 3p26-p25 //
8078262	UBE2E1	NM_003341 // UBE2E1 // ubiquitin-conjugating enzyme E2E 1 (UBC4/5 homolog. yeast
8078270	RPL15	NM_002948 // RPL15 // ribosomal protein L15 // 3p24.2 // 6138 /// ENST0000041369
8078450	CRTAP	NM_006371 // CRTAP // cartilage associated protein // 3p22.3 // 10491 /// ENST00
8078544	MLH1	NM_000249 // MLH1 // mutL homolog 1. colon cancer. nonpolyposis type 2 (E. coli)
8078690	DLEC1	NM_007335 // DLEC1 // deleted in lung and esophageal cancer 1 // 3p22-p21.3 // 9
8078888	CCR8	NM_005201 // CCR8 // chemokine (C-C motif) receptor 8 // 3p22 // 1237 /// ENST00
8078962	EIF1B	NM_005875 // EIF1B // eukaryotic translation initiation factor 1B // 3p22.1 // 1
8078999	ZNF620	NM_175888 // ZNF620 // zinc finger protein 620 // 3p22.1 // 253639 /// NR_024114
8079346	SACM1L	NM_014016 // SACM1L // SAC1 suppressor of actin mutations 1-like (yeast) // 3p21
8079462	NBEAL2	NM_015175 // NBEAL2 // neurobeachin-like 2 // 3p21.31 // 23218 /// ENST000004500
8079517	KLHL18	NM_025010 // KLHL18 // kelch-like 18 (Drosophila) // 3p21.31 // 23276 /// ENST00
8079637	ATRIP	NM_130384 // ATRIP // ATR interacting protein // 3p21.31 // 84126 /// NM_032166
8079950	GNAI2	NM_002070 // GNAI2 // guanine nucleotide binding protein (G protein). alpha inhi
8080013	MAPKAPK3	NM_004635 // MAPKAPK3 // mitogen-activated protein kinase-activated protein kina
8080184	ALAS1	NM_000688 // ALAS1 // aminolevulinate. delta-. synthase 1 // 3p21.1 // 211 /// N
8080198	PPM1M	NM_144641 // PPM1M // protein phosphatase 1M (PP2C domain containing) // 3p21.2
8080487	PRKCD	NM_006254 // PRKCD // protein kinase C. delta // 3p21.31 // 5580 /// NM_212539 /
8080781	PXK	NM_017771 // PXK // PX domain containing serine/threonine kinase // 3p14.3 // 54
8080973	PPP4R2	NM_174907 // PPP4R2 // protein phosphatase 4. regulatory subunit 2 // 3p13 // 15
8081386	NFKBIZ	NM_031419 // NFKBIZ // nuclear factor of kappa light polypeptide gene enhancer i
8081612	ABHD10	NM_018394 // ABHD10 // abhydrolase domain containing 10 // 3q13.2 // 55347 /// E
8081740	ATP6V1A	NM_001690 // ATP6V1A // ATPase. H+ transporting. lysosomal 70kDa. V1 subunit A /
8081779	ZDHHC23	NM_173570 // ZDHHC23 // zinc finger. DHHC-type containing 23 // 3q13.31 // 25488
8081838	CDGAP	NM_020754 // CDGAP // Cdc42 GTPase-activating protein // 3q13.33 // 57514 /// EN
8082035	CD86	NM_175862 // CD86 // CD86 molecule // 3q21 // 942 /// NM_006889 // CD86 // CD86
8082075	DTX3L	NM_138287 // DTX3L // deltex 3-like (Drosophila) // 3q21.1 // 151636 /// ENST000
8082100	PARP14	NM_017554 // PARP14 // poly (ADP-ribose) polymerase family. member 14 // 3q21.1
8082517	C3orf47	NR_026991 // C3orf47 // chromosome 3 open reading frame 47 // 3q21.3 // 339942 /
8082607	ATP2C1	NM_014382 // ATP2C1 // ATPase. Ca++ transporting. type 2C. member 1 // 3q22.1 //
8082673	ACPP	NM_001099 // ACPP // acid phosphatase. prostate // 3q21-q23 // 55 /// NM_0011341
8083032	NA	---
8083119	RNF7	NM_014245 // RNF7 // ring finger protein 7 // 3q22-q24 // 9616 /// NM_183237 //
8083282	HPS3	NM_032383 // HPS3 // Hermansky-Pudlak syndrome 3 // 3q24 // 84343 /// ENST000002
8083457	RAP2B	NM_002886 // RAP2B // RAP2B. member of RAS oncogene family // 3q25.2 // 5912 ///
8083494	MME	NM_007288 // MME // membrane metallo-endopeptidase // 3q25.1-q25.2 // 4311 /// N
8083523	GMPS	NM_003875 // GMPS // guanine monphosphate synthetase // 3q24 // 8833 /// ENST000
8083569	TIPARP	NM_015508 // TIPARP // TCDD-inducible poly(ADP-ribose) polymerase // 3q25.31 //
8083656	MFSD1	NM_022736 // MFSD1 // major facilitator superfamily domain containing 1 // 3q25.
8084064	MTHFD2	NM_006636 // MTHFD2 // methylenetetrahydrofolate dehydrogenase (NADP+ dependent)
8084206	B3GNT5	NM_032047 // B3GNT5 // UDP-GlcNAc:betaGal beta-1.3-N-acetylglucosaminyltransfera
8084630	NA	---
8084794	IL1RAP	NM_002182 // IL1RAP // interleukin 1 receptor accessory protein // 3q28 // 3556
8084921	LOC100128262	AK094115 // LOC100128262 // hypothetical LOC100128262 // 3q29 // 100128262
8084947	FBXO45	NM_001105573 // FBXO45 // F-box protein 45 // 3q29 // 200933 /// ENST00000311630
8084951	LRRC33	NM_198565 // LRRC33 // leucine rich repeat containing 33 // 3q29 // 375387 /// E
8085206	CAMK1	NM_003656 // CAMK1 // calcium/calmodulin-dependent protein kinase I // 3p25.3 //
8085954	AZI2	NM_022461 // AZI2 // 5-azacytidine induced 2 // 3p24.1 // 64343 /// NM_001134432
8086028	GLB1	NM_000404 // GLB1 // galactosidase. beta 1 // 3p21.33 // 2720 /// NM_001079811 /
8086451	HIGD1A	NM_001099669 // HIGD1A // HIG1 hypoxia inducible domain family. member 1A // 3p2
8086961	PFKFB4	NM_004567 // PFKFB4 // 6-phosphofructo-2-kinase/fructose-2.6-biphosphatase 4 //
8087380	USP4	NM_003363 // USP4 // ubiquitin specific peptidase 4 (proto-oncogene) // 3p21.3 /
8087640	RASSF1	NM_007182 // RASSF1 // Ras association (RalGDS/AF-6) domain family member 1 // 3
8087833	DUSP7	NM_001947 // DUSP7 // dual specificity phosphatase 7 // 3p21 // 1849 /// ENST000
8087860	TWF2	NM_007284 // TWF2 // twinfilin. actin-binding protein. homolog 2 (Drosophila) //
8087874	WDR82	NM_025222 // WDR82 // WD repeat domain 82 // 3p21.2-p21.1 // 80335 /// ENST00000
8088106	TKT	NM_001135055 // TKT // transketolase // 3p14.3 // 7086 /// NM_001064 // TKT // t
8088167	SELK	NM_021237 // SELK // selenoprotein K // 3p21.31 // 58515 /// ENST00000231908 //
8088820	RYBP	NM_012234 // RYBP // RING1 and YY1 binding protein // 3p13 // 23429 /// ENST0000
8089478	GCET2	NM_001008756 // GCET2 // germinal center expressed transcript 2 // 3q13.2 // 257
8089519	BTLA	NM_181780 // BTLA // B and T lymphocyte associated // 3q13.2 // 151888 /// NM_00
8089795	COX17	NM_005694 // COX17 // COX17 cytochrome c oxidase assembly homolog (S. cerevisiae
8089911	HCLS1	NM_005335 // HCLS1 // hematopoietic cell-specific Lyn substrate 1 // 3q13 // 305
8090018	PARP9	NM_031458 // PARP9 // poly (ADP-ribose) polymerase family. member 9 // 3q21 // 8
8090193	HEG1	NM_020733 // HEG1 // HEG homolog 1 (zebrafish) // 3q21.2 // 57493 /// ENST000003
8090277	OSBPL11	NM_022776 // OSBPL11 // oxysterol binding protein-like 11 // 3q21 // 114885 ///
8090420	TPRA1	NM_016372 // TPRA1 // transmembrane protein. adipocyte asscociated 1 // 3q21.2 /
8090546	CNBP	NM_001127192 // CNBP // CCHC-type zinc finger. nucleic acid binding protein // 3
8091141	XRN1	NM_019001 // XRN1 // 5'-3' exoribonuclease 1 // 3q23 // 54464 /// NM_001042604 /
8091188	NA	---
8091327	PLSCR1	NM_021105 // PLSCR1 // phospholipid scramblase 1 // 3q23 // 5359 /// ENST0000034
8091452	TMEM183B	NM_001079809 // TMEM183B // transmembrane protein 183B // 3q25.1 // 653659 /// N
8091458	SERP1	NM_014445 // SERP1 // stress-associated endoplasmic reticulum protein 1 // 3q25.
8091503	GPR171	NM_013308 // GPR171 // G protein-coupled receptor 171 // 3q25.1 // 29909 /// ENS
8091523	P2RY13	NM_176894 // P2RY13 // purinergic receptor P2Y. G-protein coupled. 13 // 3q24 //
8091658	CCNL1	NM_020307 // CCNL1 // cyclin L1 // 3q25.31 // 57018 /// ENST00000295926 // CCNL1
8091954	GOLIM4	NM_014498 // GOLIM4 // golgi integral membrane protein 4 // 3q26.2 // 27333 ///
8092134	PLD1	NM_002662 // PLD1 // phospholipase D1. phosphatidylcholine-specific // 3q26 // 5
8092162	PP13439	ENST00000331659 // PP13439 // hypothetical LOC100128046 // 3q26.31 // 100128046
8092169	TNFSF10	NM_003810 // TNFSF10 // tumor necrosis factor (ligand) superfamily. member 10 //
8092933	ACAP2	NM_012287 // ACAP2 // ArfGAP with coiled-coil. ankyrin repeat and PH domains 2 /
8093272	LOC348840	NR_003291 // LOC348840 // hypothetical LOC348840 // 3q29 // 348840 /// AK125940
8093624	SH3BP2	NM_001145856 // SH3BP2 // SH3-domain binding protein 2 // 4p16.3 // 6452 /// NM_
8093943	LOC93622	AK026375 // LOC93622 // hypothetical LOC93622 // 4p16.1 // 93622
8093961	KIAA0232	NM_014743 // KIAA0232 // KIAA0232 // 4p16.1 // 9778 /// NM_001100590 // KIAA0232
8094228	BST1	NM_004334 // BST1 // bone marrow stromal cell antigen 1 // 4p15 // 683 /// ENST0
8094259	LAP3	NM_015907 // LAP3 // leucine aminopeptidase 3 // 4p15.32 // 51056 /// ENST000002
8094378	PI4K2B	NM_018323 // PI4K2B // phosphatidylinositol 4-kinase type 2 beta // 4p15.2 // 55
8094533	FLJ16686	AK304357 // FLJ16686 // FLJ16686 protein // 4p14 // 401124 /// AK316523 // FLJ16
8094556	PGM2	NM_018290 // PGM2 // phosphoglucomutase 2 // 4p14 // 55276 /// ENST00000381967 /
8094599	KLF3	NM_016531 // KLF3 // Kruppel-like factor 3 (basic) // 4p14 // 51274 /// NR_02680
8095139	SRD5A3	NM_024592 // SRD5A3 // steroid 5 alpha-reductase 3 // 4q12 // 79644 /// ENST0000
8095343	STAP1	NM_012108 // STAP1 // signal transducing adaptor family member 1 // 4q13.2 // 26
8095362	MT2A	NM_005953 // MT2A // metallothionein 2A // 16q13 // 4502 /// ENST00000245185 //
8095376	MT2A	NM_005953 // MT2A // metallothionein 2A // 16q13 // 4502 /// ENST00000245185 //
8095680	IL8	NM_000584 // IL8 // interleukin 8 // 4q13-q21 // 3576 /// ENST00000307407 // IL8
8095697	CXCL1	NM_001511 // CXCL1 // chemokine (C-X-C motif) ligand 1 (melanoma growth stimulat
8095728	EREG	NM_001432 // EREG // epiregulin // 4q13.3 // 2069 /// ENST00000244869 // EREG //
8095736	AREG	NM_001657 // AREG // amphiregulin // 4q13-q21 // 374 /// BC009799 // AREG // amp
8095744	AREG	NM_001657 // AREG // amphiregulin // 4q13-q21 // 374 /// BC009799 // AREG // amp
8096032	PRDM8	NM_020226 // PRDM8 // PR domain containing 8 // 4q21 // 56978 /// NM_001099403 /
8096116	AGPAT9	NM_032717 // AGPAT9 // 1-acylglycerol-3-phosphate O-acyltransferase 9 // 4q21.23
8096335	HERC6	NM_017912 // HERC6 // hect domain and RLD 6 // 4q22.1 // 55008 /// ENST000002643
8096361	HERC5	NM_016323 // HERC5 // hect domain and RLD 5 // 4q22.1 // 51191 /// ENST000002643
8096602	DAPP1	NM_014395 // DAPP1 // dual adaptor of phosphotyrosine and 3-phosphoinositides //
8097128	EXOSC9	NM_001034194 // EXOSC9 // exosome component 9 // 4q27 // 5393 /// NM_005033 // E
8097553	IL15	NM_172174 // IL15 // interleukin 15 // 4q31 // 3600 /// NM_000585 // IL15 // int
8097657	SMAD1	NM_005900 // SMAD1 // SMAD family member 1 // 4q31 // 4086 /// NM_001003688 // S
8098121	RAPGEF2	NM_014247 // RAPGEF2 // Rap guanine nucleotide exchange factor (GEF) 2 // 4q32.1
8098177	KLHL2	NM_007246 // KLHL2 // kelch-like 2. Mayven (Drosophila) // 4q21.2 // 11275 /// N
8098261	NA	---
8098512	C4orf41	NM_021942 // C4orf41 // chromosome 4 open reading frame 41 // 4q35.1 // 60684 //
8098611	TLR3	NM_003265 // TLR3 // toll-like receptor 3 // 4q35 // 7098 /// ENST00000296795 //
8099235	MRFAP1L1	NM_203462 // MRFAP1L1 // Morf4 family associated protein 1-like 1 // 4p16.1 // 1
8099395	RAB28	NM_004249 // RAB28 // RAB28. member RAS oncogene family // 4p15.33 // 9364 /// N
8099449	FBXL5	NM_033535 // FBXL5 // F-box and leucine-rich repeat protein 5 // 4p15.32 // 2623
8099826	TLR10	NM_030956 // TLR10 // toll-like receptor 10 // 4p14 // 81793 /// NM_001017388 //
8099834	TLR1	NM_003263 // TLR1 // toll-like receptor 1 // 4p14 // 7096 /// ENST00000308979 //
8099841	TLR6	NM_006068 // TLR6 // toll-like receptor 6 // 4p14 // 10333 /// ENST00000381950 /
8099912	C4orf34	BC008502 // C4orf34 // chromosome 4 open reading frame 34 // 4p14 // 201895 ///
8100977	CXCL5	NM_002994 // CXCL5 // chemokine (C-X-C motif) ligand 5 // 4q12-q13 // 6374 /// E
8100984	CXCL3	NM_002090 // CXCL3 // chemokine (C-X-C motif) ligand 3 // 4q21 // 2921 /// ENST0
8100994	CXCL2	NM_002089 // CXCL2 // chemokine (C-X-C motif) ligand 2 // 4q21 // 2920 /// ENST0
8101126	CXCL10	NM_001565 // CXCL10 // chemokine (C-X-C motif) ligand 10 // 4q21 // 3627 /// ENS
8101131	CXCL11	NM_005409 // CXCL11 // chemokine (C-X-C motif) ligand 11 // 4q21.2 // 6373 /// E
8101210	NA	---
8101429	PLAC8	NM_016619 // PLAC8 // placenta-specific 8 // 4q21.22 // 51316 /// NM_001130716 /
8101449	HPSE	NM_001098540 // HPSE // heparanase // 4q21.3 // 10855 /// NM_006665 // HPSE // h
8101511	WDFY3	NM_014991 // WDFY3 // WD repeat and FYVE domain containing 3 // 4q21.23 // 23001
8101624	KLHL8	NM_020803 // KLHL8 // kelch-like 8 (Drosophila) // 4q22.1 // 57563 /// ENST00000
8101648	HSD17B11	NM_016245 // HSD17B11 // hydroxysteroid (17-beta) dehydrogenase 11 // 4q22.1 //
8101757	GPRIN3	NM_198281 // GPRIN3 // GPRIN family member 3 // 4q22.1 // 285513 /// ENST0000033
8101839	EIF4E	NM_001968 // EIF4E // eukaryotic translation initiation factor 4E // 4q21-q25 //
8102004	NA	---
8102006	MANBA	NM_005908 // MANBA // mannosidase. beta A. lysosomal // 4q22-q25 // 4126 /// ENS
8102214	PAPSS1	NM_005443 // PAPSS1 // 3'-phosphoadenosine 5'-phosphosulfate synthase 1 // 4q24
8102362	TIFA	NM_052864 // TIFA // TRAF-interacting protein with forkhead-associated domain //
8102800	SLC7A11	NM_014331 // SLC7A11 // solute carrier family 7. (cationic amino acid transporte
8102848	SETD7	NM_030648 // SETD7 // SET domain containing (lysine methyltransferase) 7 // 4q28
8102912	TBC1D9	NM_015130 // TBC1D9 // TBC1 domain family. member 9 (with GRAM domain) // 4q31.2
8102936	NA	---
8103025	ZNF827	NM_178835 // ZNF827 // zinc finger protein 827 // 4q31.21-q31.22 // 152485 /// E
8103226	TMEM154	NM_152680 // TMEM154 // transmembrane protein 154 // 4q31.3 // 201799 /// ENST00
8103415	C4orf18	NM_001128424 // C4orf18 // chromosome 4 open reading frame 18 // 4q32.1 // 51313
8103535	GK3P	NR_026575 // GK3P // glycerol kinase 3 pseudogene // 4q32.1 // 2713 /// AK292282
8103563	DDX60	NM_017631 // DDX60 // DEAD (Asp-Glu-Ala-Asp) box polypeptide 60 // 4q32.3 // 556
8103847	NA	---
8103911	IRF2	NM_002199 // IRF2 // interferon regulatory factor 2 // 4q34.1-q35.1 // 3660 ///
8103951	ACSL1	NM_001995 // ACSL1 // acyl-CoA synthetase long-chain family member 1 // 4q34-q35
8103975	UNQ9368	NR_003542 // UNQ9368 // RTFV9368 // 4q35.1 // 643036 /// AY358224 // UNQ9368 //
8104601	BASP1	NM_006317 // BASP1 // brain abundant. membrane attached signal protein 1 // 5p15
8105067	PTGER4	NM_000958 // PTGER4 // prostaglandin E receptor 4 (subtype EP4) // 5p13.1 // 573
8105132	LOC153684	AK123995 // LOC153684 // hypothetical LOC153684 // 5p12 // 153684 /// AK002146 /
8105463	GPBP1	NM_022913 // GPBP1 // GC-rich promoter binding protein 1 // 5q11.2 // 65056 ///
8105481	GAPT	NM_152687 // GAPT // GRB2-binding adaptor protein. transmembrane // 5q11.2 // 20
8105663	NLN	NM_020726 // NLN // neurolysin (metallopeptidase M3 family) // 5q12.3 // 57486 /
8105681	ERBB2IP	NM_018695 // ERBB2IP // erbb2 interacting protein // 5q12.3 // 55914 /// NM_0010
8106252	HEXB	NM_000521 // HEXB // hexosaminidase B (beta polypeptide) // 5q13 // 3074 /// ENS
8106280	HMGCR	NM_000859 // HMGCR // 3-hydroxy-3-methylglutaryl-Coenzyme A reductase // 5q13.3-
8106475	NA	---
8106479	SCAMP1	NM_004866 // SCAMP1 // secretory carrier membrane protein 1 // 5q13.3-q14.1 // 9
8106730	XRCC4	NM_022550 // XRCC4 // X-ray repair complementing defective repair in Chinese ham
8106743	VCAN	NM_004385 // VCAN // versican // 5q14.3 // 1462 /// NM_001126336 // VCAN // vers
8107998	UQCRQ	NM_014402 // UQCRQ // ubiquinol-cytochrome c reductase. complex III subunit VII.
8108099	SEC24A	NM_021982 // SEC24A // SEC24 family. member A (S. cerevisiae) // 5q31.1 // 10802
8108217	TGFBI	NM_000358 // TGFBI // transforming growth factor. beta-induced. 68kDa // 5q31 //
8108321	FAM53C	NM_001135647 // FAM53C // family with sequence similarity 53. member C // 5q31 /
8108330	KDM3B	NM_016604 // KDM3B // lysine (K)-specific demethylase 3B // 5q31 // 51780 /// EN
8108370	EGR1	NM_001964 // EGR1 // early growth response 1 // 5q31.1 // 1958 /// ENST000002399
8108378	CTNNA1	NM_001903 // CTNNA1 // catenin (cadherin-associated protein). alpha 1. 102kDa //
8109093	ABLIM3	NM_014945 // ABLIM3 // actin binding LIM protein family. member 3 // 5q32 // 228
8109283	NDST1	NM_001543 // NDST1 // N-deacetylase/N-sulfotransferase (heparan glucosaminyl) 1
8109326	MST150	NM_032947 // MST150 // MSTP150 // 5q33.1 // 85027 /// ENST00000324552 // MST150
8109344	GM2A	NM_000405 // GM2A // GM2 ganglioside activator // 5q31.3-q33.1 // 2760 /// ENST0
8109843	DOCK2	NM_004946 // DOCK2 // dedicator of cytokinesis 2 // 5q35.1 // 1794 /// ENST00000
8109908	LOC257358	AK093725 // LOC257358 // hypothetical LOC257358 // 5q35.1 // 257358 /// ENST0000
8110022	ATP6V0E1	NM_003945 // ATP6V0E1 // ATPase. H+ transporting. lysosomal 9kDa. V0 subunit e1
8110318	PRELID1	NM_013237 // PRELID1 // PRELI domain containing 1 // 5q35.3 // 27166 /// ENST000
8110616	NA	---
8111739	FYB	NM_001465 // FYB // FYN binding protein (FYB-120/130) // 5p13.1 // 2533 /// NM_1
8111922	LOC648987	ENST00000314957 // LOC648987 // hypothetical LOC648987 // 5p12 // 648987 /// AK0
8112033	ARL15	NM_019087 // ARL15 // ADP-ribosylation factor-like 15 // 5p15.2 // 54622 /// ENS
8112107	PPAP2A	NM_003711 // PPAP2A // phosphatidic acid phosphatase type 2A // 5q11 // 8611 ///
8112121	SLC38A9	NM_173514 // SLC38A9 // solute carrier family 38. member 9 // 5q11.2 // 153129 /
8112202	PLK2	NM_006622 // PLK2 // polo-like kinase 2 (Drosophila) // 5q12.1-q13.2 // 10769 //
8112302	C5orf43	NM_001048249 // C5orf43 // chromosome 5 open reading frame 43 // 5q12.1 // 64315
8112409	SGTB	NM_019072 // SGTB // small glutamine-rich tetratricopeptide repeat (TPR)-contain
8112428	CD180	NM_005582 // CD180 // CD180 molecule // 5q12 // 4064 /// ENST00000256447 // CD18
8112478	NAIP	NM_004536 // NAIP // NLR family. apoptosis inhibitory protein // 5q13.1 // 4671
8112521	NAIP	NM_004536 // NAIP // NLR family. apoptosis inhibitory protein // 5q13.1 // 4671
8112615	ENC1	NM_003633 // ENC1 // ectodermal-neural cortex (with BTB-like domain) // 5q12-q13
8112967	TMEM167A	NM_174909 // TMEM167A // transmembrane protein 167A // 5q14.2 // 153339 /// ENST
8113039	MEF2C	NM_002397 // MEF2C // myocyte enhancer factor 2C // 5q14 // 4208 /// NM_00113100
8113130	MCTP1	NM_024717 // MCTP1 // multiple C2 domains. transmembrane 1 // 5q15 // 79772 ///
8113577	TRIM36	NM_018700 // TRIM36 // tripartite motif-containing 36 // 5q22.3 // 55521 /// NM_
8113591	PGGT1B	NM_005023 // PGGT1B // protein geranylgeranyltransferase type I. beta subunit //
8113800	FBN2	NM_001999 // FBN2 // fibrillin 2 // 5q23-q31 // 2201 /// ENST00000262464 // FBN2
8114010	IRF1	NM_002198 // IRF1 // interferon regulatory factor 1 // 5q31.1 // 3659 /// ENST00
8114225	H2AFY	NM_004893 // H2AFY // H2A histone family. member Y // 5q31.3-q32 // 9555 /// NM_
8114583	SRA1	NM_001035235 // SRA1 // steroid receptor RNA activator 1 // 5q31.3 // 10011 ///
8114612	CD14	NM_000591 // CD14 // CD14 molecule // 5q22-q32|5q31.1 // 929 /// NM_001040021 //
8114658	DIAPH1	NM_005219 // DIAPH1 // diaphanous homolog 1 (Drosophila) // 5q31 // 1729 /// NM_
8114691	HDAC3	NM_003883 // HDAC3 // histone deacetylase 3 // 5q31 // 8841 /// ENST00000305264
8114733	ARAP3	NM_022481 // ARAP3 // ArfGAP with RhoGAP domain. ankyrin repeat and PH domain 3
8114964	SPINK1	NM_003122 // SPINK1 // serine peptidase inhibitor. Kazal type 1 // 5q32 // 6690
8115076	CSF1R	NM_005211 // CSF1R // colony stimulating factor 1 receptor // 5q33-q35 // 1436 /
8115210	TNIP1	NM_006058 // TNIP1 // TNFAIP3 interacting protein 1 // 5q32-q33.1 // 10318 /// E
8115464	HAVCR2	NM_032782 // HAVCR2 // hepatitis A virus cellular receptor 2 // 5q33.3 // 84868
8115806	UBTD2	NM_152277 // UBTD2 // ubiquitin domain containing 2 // 5q35.1 // 92181 /// ENST0
8115997	RAB24	NM_001031677 // RAB24 // RAB24. member RAS oncogene family // 5q35.3 // 53917 //
8116348	TBC1D9B	NM_198868 // TBC1D9B // TBC1 domain family. member 9B (with GRAM domain) // 5q35
8116372	RNF130	NM_018434 // RNF130 // ring finger protein 130 // 5q35.3 // 55819 /// ENST000002
8116559	IRF4	NM_002460 // IRF4 // interferon regulatory factor 4 // 6p25-p23 // 3662 /// ENST
8116610	NQO2	NM_000904 // NQO2 // NAD(P)H dehydrogenase. quinone 2 // 6pter-q12 // 4835 /// E
8116622	RIPK1	NM_003804 // RIPK1 // receptor (TNFRSF)-interacting serine-threonine kinase 1 //
8116734	LY86	NM_004271 // LY86 // lymphocyte antigen 86 // 6p25.1 // 9450 /// ENST00000379953
8117106	RNF144B	NM_182757 // RNF144B // ring finger protein 144B // 6p22.3 // 255488 /// ENST000
8117321	TRIM38	NM_006355 // TRIM38 // tripartite motif-containing 38 // 6p21.3 // 10475 /// ENS
8117402	HIST1H4E	NM_003545 // HIST1H4E // histone cluster 1. H4e // 6p21.3 // 8367 /// CR542180 /
8117929	ABCF1	NM_001025091 // ABCF1 // ATP-binding cassette. sub-family F (GCN20). member 1 //
8117995	TUBB	NM_178014 // TUBB // tubulin. beta // 6p21.33 // 203068 /// ENST00000383564 // T
8118100	MICA	NM_000247 // MICA // MHC class I polypeptide-related sequence A // 6p21.33 // 42
8118116	MICB	NM_005931 // MICB // MHC class I polypeptide-related sequence B // 6p21.3 // 427
8118149	LST1	NM_007161 // LST1 // leukocyte specific transcript 1 // 6p21.3 // 7940 /// NM_20
8118310	HSPA1A	NM_005345 // HSPA1A // heat shock 70kDa protein 1A // 6p21.3 // 3303 /// BC00245
8118314	HSPA1B	NM_005346 // HSPA1B // heat shock 70kDa protein 1B // 6p21.3 // 3304 /// NM_0053
8119088	CDKN1A	NM_078467 // CDKN1A // cyclin-dependent kinase inhibitor 1A (p21. Cip1) // 6p21.
8119132	FGD2	NM_173558 // FGD2 // FYVE. RhoGEF and PH domain containing 2 // 6p21.2 // 221472
8119161	PIM1	NM_002648 // PIM1 // pim-1 oncogene // 6p21.2 // 5292 /// ENST00000373509 // PIM
8119169	TBC1D22B	NM_017772 // TBC1D22B // TBC1 domain family. member 22B // 6p21.2 // 55633 /// E
8119198	FTSJD2	NM_015050 // FTSJD2 // FtsJ methyltransferase domain containing 2 // 6p21.2 // 2
8119609	CNPY3	NM_006586 // CNPY3 // canopy 3 homolog (zebrafish) // 6pter-p12.1 // 10695 /// E
8119898	VEGFA	NM_001025366 // VEGFA // vascular endothelial growth factor A // 6p12 // 7422 //
8119926	TMEM63B	NM_018426 // TMEM63B // transmembrane protein 63B // 6p21.1 // 55362 /// ENST000
8120428	FKBP1A	NM_000801 // FKBP1A // FK506 binding protein 1A. 12kDa // 20p13 // 2280 /// ENST
8120602	OGFRL1	NM_024576 // OGFRL1 // opioid growth factor receptor-like 1 // 6q13 // 79627 ///
8120943	CYB5R4	NM_016230 // CYB5R4 // cytochrome b5 reductase 4 // 6pter-q22.33 // 51167 /// EN
8121031	SLC35A1	NM_006416 // SLC35A1 // solute carrier family 35 (CMP-sialic acid transporter).
8121794	SMPDL3A	NM_006714 // SMPDL3A // sphingomyelin phosphodiesterase. acid-like 3A // 6q22.31
8122343	HECA	NM_016217 // HECA // headcase homolog (Drosophila) // 6q23-q24 // 51696 /// ENST
8122426	PHACTR2	NM_014721 // PHACTR2 // phosphatase and actin regulator 2 // 6q24.2 // 9749 ///
8122457	STX11	NM_003764 // STX11 // syntaxin 11 // 6q24.2 // 8676 /// ENST00000367568 // STX11
8122705	PCMT1	NM_005389 // PCMT1 // protein-L-isoaspartate (D-aspartate) O-methyltransferase /
8123315	QKI	NM_206855 // QKI // quaking homolog. KH domain RNA binding (mouse) // 6q26|6q26-
8123598	SERPINB1	NM_030666 // SERPINB1 // serpin peptidase inhibitor. clade B (ovalbumin). member
8123606	MGC39372	BC025340 // MGC39372 // hypothetical protein MGC39372 // 6p25.2 // 221756 /// XM
8123609	SERPINB9	NM_004155 // SERPINB9 // serpin peptidase inhibitor. clade B (ovalbumin). member
8123637	NQO2	NM_000904 // NQO2 // NAD(P)H dehydrogenase. quinone 2 // 6pter-q12 // 4835 /// E
8123678	C6orf145	NM_183373 // C6orf145 // chromosome 6 open reading frame 145 // 6p25.2 // 221749
8123695	PECI	NM_206836 // PECI // peroxisomal D3.D2-enoyl-CoA isomerase // 6p24.3 // 10455 //
8123951	C6orf105	NM_001143948 // C6orf105 // chromosome 6 open reading frame 105 // 6p24.1 // 848
8123961	TBC1D7	NM_016495 // TBC1D7 // TBC1 domain family. member 7 // 6p24.1 // 51256 /// NM_00
8124134	TPMT	NM_000367 // TPMT // thiopurine S-methyltransferase // 6p22.3 // 7172 /// ENST00
8124406	HIST1H2BC	NM_003526 // HIST1H2BC // histone cluster 1. H2bc // 6p21.3 // 8347 /// BC105595
8124726	TRIM26	NM_003449 // TRIM26 // tripartite motif-containing 26 // 6p21.3 // 7726 /// ENST
8124756	PPP1R10	NM_002714 // PPP1R10 // protein phosphatase 1. regulatory (inhibitor) subunit 10
8124848	IER3	NM_003897 // IER3 // immediate early response 3 // 6p21.3 // 8870 /// ENST000002
8125017	BAT5	NM_021160 // BAT5 // HLA-B associated transcript 5 // 6p21.3 // 7920 /// ENST000
8125461	HLA-DQB1	AK097297 // HLA-DQB1 // major histocompatibility complex. class II. DQ beta 1 //
8125470	HLA-DOB	NM_002120 // HLA-DOB // major histocompatibility complex. class II. DO beta // 6
8125500	PSMB8	NM_004159 // PSMB8 // proteasome (prosome. macropain) subunit. beta type. 8 (lar
8125512	TAP1	NM_000593 // TAP1 // transporter 1. ATP-binding cassette. sub-family B (MDR/TAP)
8125537	HLA-DMA	NM_006120 // HLA-DMA // major histocompatibility complex. class II. DM alpha //
8125993	ETV7	NM_016135 // ETV7 // ets variant 7 // 6p21 // 51513 /// ENST00000340181 // ETV7
8126442	TBCC	NM_003192 // TBCC // tubulin folding cofactor C // 6pter-p12.1 // 6903 /// ENST0
8126629	GTPBP2	NM_019096 // GTPBP2 // GTP binding protein 2 // 6p21-p12 // 54676 /// ENST000003
8126784	PLA2G7	NM_005084 // PLA2G7 // phospholipase A2. group VII (platelet-activating factor a
8127051	TRAM2	NM_012288 // TRAM2 // translocation associated membrane protein 2 // 6p21.1-p12
8127534	C6orf150	NM_138441 // C6orf150 // chromosome 6 open reading frame 150 // 6q13 // 115004 /
8127778	FAM46A	NM_017633 // FAM46A // family with sequence similarity 46. member A // 6q14 // 5
8127943	SNX14	NM_153816 // SNX14 // sorting nexin 14 // 6q14.3 // 57231 /// NM_020468 // SNX14
8128894	REV3L	NM_002912 // REV3L // REV3-like. catalytic subunit of DNA polymerase zeta (yeast
8128939	TRAF3IP2	NM_147686 // TRAF3IP2 // TRAF3 interacting protein 2 // 6q21 // 10758 /// NM_147
8129379	ECHDC1	NM_001002030 // ECHDC1 // enoyl Coenzyme A hydratase domain containing 1 // 6q22
8129458	ARHGAP18	NM_033515 // ARHGAP18 // Rho GTPase activating protein 18 // 6q22.33 // 93663 //
8129590	STX7	NM_003569 // STX7 // syntaxin 7 // 6q23.1 // 8417 /// ENST00000448348 // STX7 //
8129627	VNN3	NM_078625 // VNN3 // vanin 3 // 6q23-q24 // 55350 /// NM_001024460 // VNN3 // va
8129637	VNN2	NM_004665 // VNN2 // vanin 2 // 6q23-q24 // 8875 /// NM_078488 // VNN2 // vanin
8129804	MAP3K5	NM_005923 // MAP3K5 // mitogen-activated protein kinase kinase kinase 5 // 6q22.
8129974	FUCA2	NM_032020 // FUCA2 // fucosidase. alpha-L- 2. plasma // 6q24 // 2519 /// ENST000
8130032	FBXO30	NM_032145 // FBXO30 // F-box protein 30 // 6q24 // 84085 /// ENST00000237281 //
8130073	ZC3H12D	NM_207360 // ZC3H12D // zinc finger CCCH-type containing 12D // 6q25.1 // 340152
8130499	DYNLT1	NM_006519 // DYNLT1 // dynein. light chain. Tctex-type 1 // 6q25.2-q25.3 // 6993
8130539	TAGAP	NM_054114 // TAGAP // T-cell activation RhoGTPase activating protein // 6q25.3 /
8130556	SOD2	NM_001024465 // SOD2 // superoxide dismutase 2. mitochondrial // 6q25.3 // 6648
8130732	BRP44L	NM_016098 // BRP44L // brain protein 44-like // 6q27 // 51660 /// ENST0000034175
8130785	GPR31	NM_005299 // GPR31 // G protein-coupled receptor 31 // 6q27 // 2853 /// ENST0000
8130993	FAM20C	NM_020223 // FAM20C // family with sequence similarity 20. member C // 7p22.3 //
8131135	CHST12	NM_018641 // CHST12 // carbohydrate (chondroitin 4) sulfotransferase 12 // 7p22
8131179	TTYH3	NM_025250 // TTYH3 // tweety homolog 3 (Drosophila) // 7p22 // 80727 /// ENST000
8131265	KIAA0415	NM_014855 // KIAA0415 // KIAA0415 // 7p22.2 // 9907 /// ENST00000348624 // KIAA0
8131339	FSCN1	NM_003088 // FSCN1 // fascin homolog 1. actin-bundling protein (Strongylocentrot
8131438	ZNF316	XR_078693 // ZNF316 // zinc finger protein 316 // 7p22.1 // 100131017
8131600	TSPAN13	NM_014399 // TSPAN13 // tetraspanin 13 // 7p21.1 // 27075 /// ENST00000262067 //
8131944	NFE2L3	NM_004289 // NFE2L3 // nuclear factor (erythroid-derived 2)-like 3 // 7p15-p14 /
8131957	SNX10	NM_013322 // SNX10 // sorting nexin 10 // 7p15.2 // 29887 /// ENST00000338523 //
8132182	C7orf16	NM_006658 // C7orf16 // chromosome 7 open reading frame 16 // 7p15 // 10842 ///
8132305	EEPD1	NM_030636 // EEPD1 // endonuclease/exonuclease/phosphatase family domain contain
8132515	BLVRA	NM_000712 // BLVRA // biliverdin reductase A // 7p14-cen // 644 /// ENST00000265
8132539	DBNL	NM_014063 // DBNL // drebrin-like // 7p13 // 28988 /// NM_001014436 // DBNL // d
8132646	CCM2	NM_031443 // CCM2 // cerebral cavernous malformation 2 // 7p13 // 83605 /// NM_0
8132725	UPP1	NM_003364 // UPP1 // uridine phosphorylase 1 // 7p12.3 // 7378 /// NM_181597 //
8133167	KCTD7	NM_153033 // KCTD7 // potassium channel tetramerisation domain containing 7 // 7
8133176	RABGEF1	NM_014504 // RABGEF1 // RAB guanine nucleotide exchange factor (GEF) 1 // 7q11.2
8133442	LAT2	NM_032464 // LAT2 // linker for activation of T cells family. member 2 // 7q11.2
8133876	CD36	NM_001001548 // CD36 // CD36 molecule (thrombospondin receptor) // 7q11.2 // 948
8134890	GNB2	NM_005273 // GNB2 // guanine nucleotide binding protein (G protein). beta polype
8135064	TRIM56	NM_030961 // TRIM56 // tripartite motif-containing 56 // 7q22.1 // 81844 /// ENS
8135149	SH2B2	NM_020979 // SH2B2 // SH2B adaptor protein 2 // 7q22 // 10603 /// ENST0000030680
8135275	NA	---
8135480	DNAJB9	NM_012328 // DNAJB9 // DnaJ (Hsp40) homolog. subfamily B. member 9 // 7q31|14q24
8136388	TMEM140	NM_018295 // TMEM140 // transmembrane protein 140 // 7q33 // 55281 /// ENST00000
8136557	TBXAS1	NM_001130966 // TBXAS1 // thromboxane A synthase 1 (platelet) // 7q34-q35 // 691
8136918	ZYX	NM_003461 // ZYX // zyxin // 7q32 // 7791 /// NM_001010972 // ZYX // zyxin // 7q
8136954	FAM115C	NM_001130025 // FAM115C // family with sequence similarity 115. member C // 7q35
8137414	NUB1	NM_016118 // NUB1 // negative regulator of ubiquitin-like proteins 1 // 7q36 //
8137627	DNAJB6	NM_058246 // DNAJB6 // DnaJ (Hsp40) homolog. subfamily B. member 6 // 7q36.3 //
8137979	ACTB	NM_001101 // ACTB // actin. beta // 7p15-p12 // 60 /// ENST00000331789 // ACTB /
8138091	DAGLB	NM_139179 // DAGLB // diacylglycerol lipase. beta // 7p22.1 // 221955 /// NM_001
8138454	TWISTNB	NM_001002926 // TWISTNB // TWIST neighbor // 7p21.1 // 221830 /// ENST0000022256
8138602	DFNA5	NM_004403 // DFNA5 // deafness. autosomal dominant 5 // 7p15 // 1687 /// NM_0011
8138689	SKAP2	NM_003930 // SKAP2 // src kinase associated phosphoprotein 2 // 7p21-p15 // 8935
8138708	HOXA1	NM_005522 // HOXA1 // homeobox A1 // 7p15.3 // 3198 /// NM_153620 // HOXA1 // ho
8138805	CPVL	NM_019029 // CPVL // carboxypeptidase. vitellogenic-like // 7p15-p14 // 54504 //
8138922	KBTBD2	NM_015483 // KBTBD2 // kelch repeat and BTB (POZ) domain containing 2 // 7p14.3
8138941	NT5C3	NM_001002009 // NT5C3 // 5'-nucleotidase. cytosolic III // 7p14.3 // 51251 /// N
8139207	INHBA	NM_002192 // INHBA // inhibin. beta A // 7p15-p13 // 3624 /// ENST00000242208 //
8139433	MYO1G	NM_033054 // MYO1G // myosin IG // 7p13-p11.2 // 64005 /// ENST00000258787 // MY
8139859	GUSB	NM_000181 // GUSB // glucuronidase. beta // 7q21.11 // 2990 /// ENST00000304895
8140070	TBL2	NM_012453 // TBL2 // transducin (beta)-like 2 // 7q11.23 // 26608 /// ENST000003
8140319	HIP1	NM_005338 // HIP1 // huntingtin interacting protein 1 // 7q11.23 // 3092 /// ENS
8140463	FGL2	NM_006682 // FGL2 // fibrinogen-like 2 // 7q11.23 // 10875 /// ENST00000248598 /
8140668	SEMA3A	NM_006080 // SEMA3A // sema domain. immunoglobulin domain (Ig). short basic doma
8140814	SLC25A40	NM_018843 // SLC25A40 // solute carrier family 25. member 40 // 7q21.12 // 55972
8140840	STEAP4	NM_024636 // STEAP4 // STEAP family member 4 // 7q21.12 // 79689 /// ENST0000038
8140967	SAMD9	NM_017654 // SAMD9 // sterile alpha motif domain containing 9 // 7q21.2 // 54809
8140971	SAMD9L	NM_152703 // SAMD9L // sterile alpha motif domain containing 9-like // 7q21.2 //
8141094	PDK4	NM_002612 // PDK4 // pyruvate dehydrogenase kinase. isozyme 4 // 7q21.3 // 5166
8141688	PLOD3	NM_001084 // PLOD3 // procollagen-lysine. 2-oxoglutarate 5-dioxygenase 3 // 7q22
8142307	PNPLA8	NM_015723 // PNPLA8 // patatin-like phospholipase domain containing 8 // 7q31 //
8142345	DOCK4	NM_014705 // DOCK4 // dedicator of cytokinesis 4 // 7q31.1 // 9732 /// ENST00000
8142415	C7orf60	NM_152556 // C7orf60 // chromosome 7 open reading frame 60 // 7q31.1 // 154743 /
8142452	TFEC	NM_012252 // TFEC // transcription factor EC // 7q31.2 // 22797 /// NM_001018058
8142663	NDUFA5	NM_005000 // NDUFA5 // NADH dehydrogenase (ubiquinone) 1 alpha subcomplex. 5. 13
8142975	NA	---
8143327	PARP12	NM_022750 // PARP12 // poly (ADP-ribose) polymerase family. member 12 // 7q34 //
8143441	KIAA1147	BC012493 // KIAA1147 // KIAA1147 // 7q34 // 57189 /// NM_001080392 // KIAA1147 /
8143663	EZH2	NM_004456 // EZH2 // enhancer of zeste homolog 2 (Drosophila) // 7q35-q36 // 214
8143899	IQCA1L	XR_018506 // IQCA1L // IQ motif containing with AAA domain 1-like // 7q36.1 // 3
8144685	NA	---
8144931	ATP6V1B2	NM_001693 // ATP6V1B2 // ATPase. H+ transporting. lysosomal 56/58kDa. V1 subunit
8145317	ADAMDEC1	NM_014479 // ADAMDEC1 // ADAM-like. decysin 1 // 8p21.2 // 27299 /// NM_00114527
8145365	DOCK5	NM_024940 // DOCK5 // dedicator of cytokinesis 5 // 8p21.2 // 80005 /// ENST0000
8145470	DPYSL2	NM_001386 // DPYSL2 // dihydropyrimidinase-like 2 // 8p22-p21 // 1808 /// ENST00
8146000	ADAM9	NM_003816 // ADAM9 // ADAM metallopeptidase domain 9 (meltrin gamma) // 8p11.22
8146092	IDO1	NM_002164 // IDO1 // indoleamine 2.3-dioxygenase 1 // 8p12-p11 // 3620 /// ENST0
8146105	IDO2	NM_194294 // IDO2 // indoleamine 2.3-dioxygenase 2 // 8p11.21 // 169355 /// AK12
8146336	KIAA0146	AK301677 // KIAA0146 // KIAA0146 // 8q11.21 // 23514 /// AK294248 // KIAA0146 //
8146500	LYN	NM_002350 // LYN // v-yes-1 Yamaguchi sarcoma viral related oncogene homolog //
8146544	UBXN2B	NM_001077619 // UBXN2B // UBX domain protein 2B // 8q12.1 // 137886 /// ENST0000
8147040	ZBTB10	NM_001105539 // ZBTB10 // zinc finger and BTB domain containing 10 // 8q13-q21.1
8147206	RIPK2	NM_003821 // RIPK2 // receptor-interacting serine-threonine kinase 2 // 8q21 //
8147262	OTUD6B	NM_016023 // OTUD6B // OTU domain containing 6B // 8q21.3 // 51633 /// AK293843
8147439	PLEKHF2	NM_024613 // PLEKHF2 // pleckstrin homology domain containing. family F (with FY
8147469	PGCP	NM_016134 // PGCP // plasma glutamate carboxypeptidase // 8q22.2 // 10404 /// EN
8147661	SPAG1	NM_003114 // SPAG1 // sperm associated antigen 1 // 8q22.2 // 6674 /// NM_172218
8147721	FLJ45248	AK127183 // FLJ45248 // FLJ45248 protein // 8q22.3 // 401472
8147742	NA	---
8147746	NA	---
8147756	BAALC	NM_024812 // BAALC // brain and acute leukemia. cytoplasmic // 8q22.3 // 79870 /
8148280	SQLE	NM_003129 // SQLE // squalene epoxidase // 8q24.1 // 6713 /// ENST00000265896 //
8148317	MYC	NM_002467 // MYC // v-myc myelocytomatosis viral oncogene homolog (avian) // 8q2
8148476	DENND3	NM_014957 // DENND3 // DENN/MADD domain containing 3 // 8q24.3 // 22898 /// ENST
8148572	LY6E	NM_002346 // LY6E // lymphocyte antigen 6 complex. locus E // 8q24.3 // 4061 ///
8149264	PPP1R3B	NM_024607 // PPP1R3B // protein phosphatase 1. regulatory (inhibitor) subunit 3B
8149330	CTSB	NM_147780 // CTSB // cathepsin B // 8p22 // 1508 /// NM_147781 // CTSB // cathep
8149534	ASAH1	NM_004315 // ASAH1 // N-acylsphingosine amidohydrolase (acid ceramidase) 1 // 8p
8149555	PSD3	NM_015310 // PSD3 // pleckstrin and Sec7 domain containing 3 // 8pter-p23.3 // 2
8149638	DOK2	NM_003974 // DOK2 // docking protein 2. 56kDa // 8p21.3 // 9046 /// ENST00000276
8149673	REEP4	NM_025232 // REEP4 // receptor accessory protein 4 // 8p21.3 // 80346 /// ENST00
8149699	PHYHIP	NM_001099335 // PHYHIP // phytanoyl-CoA 2-hydroxylase interacting protein // 8p2
8150204	NA	---
8150797	ATP6V1H	NM_015941 // ATP6V1H // ATPase. H+ transporting. lysosomal 50/57kDa. V1 subunit
8150830	LYPLA1	NM_006330 // LYPLA1 // lysophospholipase I // 8q11.23 // 10434 /// ENST000003169
8150844	NA	---
8151436	PXMP3	NM_000318 // PXMP3 // peroxisomal membrane protein 3. 35kDa // 8q21.1 // 5828 //
8151457	HEY1	NM_012258 // HEY1 // hairy/enhancer-of-split related with YRPW motif 1 // 8q21 /
8151711	NBN	NM_002485 // NBN // nibrin // 8q21 // 4683 /// ENST00000265433 // NBN // nibrin
8151747	TMEM64	NM_001008495 // TMEM64 // transmembrane protein 64 // 8q21.3 // 169200 /// NM_00
8151816	GEM	NM_005261 // GEM // GTP binding protein overexpressed in skeletal muscle // 8q13
8152280	LRP12	NM_013437 // LRP12 // low density lipoprotein-related protein 12 // 8q22.2-q23.1
8152453	TRPS1	NM_014112 // TRPS1 // trichorhinophalangeal syndrome I // 8q24.12 // 7227 /// EN
8152491	EXT1	NM_000127 // EXT1 // exostoses (multiple) 1 // 8q24.11-q24.13 // 2131 /// ENST00
8152764	MTSS1	NM_014751 // MTSS1 // metastasis suppressor 1 // 8p22 // 9788 /// ENST0000032506
8152812	FAM84B	NM_174911 // FAM84B // family with sequence similarity 84. member B // 8q24.21 /
8152845	FAM49B	BC017297 // FAM49B // family with sequence similarity 49. member B // 8q24.21 //
8152863	NA	---
8153002	NDRG1	NM_001135242 // NDRG1 // N-myc downstream regulated 1 // 8q24.3 // 10397 /// NM_
8153568	PLEC1	NM_201384 // PLEC1 // plectin 1. intermediate filament binding protein 500kDa //
8153609	PARP10	NM_032789 // PARP10 // poly (ADP-ribose) polymerase family. member 10 // 8q24.3
8153959	DOCK8	NM_203447 // DOCK8 // dedicator of cytokinesis 8 // 9p24.3 // 81704 /// ENST0000
8154012	KANK1	NM_153186 // KANK1 // KN motif and ankyrin repeat domains 1 // 9p24.3 // 23189 /
8154178	JAK2	NM_004972 // JAK2 // Janus kinase 2 // 9p24 // 3717 /// ENST00000381652 // JAK2
8154233	CD274	NM_014143 // CD274 // CD274 molecule // 9p24 // 29126 /// ENST00000381577 // CD2
8154765	DNAJA1	NM_001539 // DNAJA1 // DnaJ (Hsp40) homolog. subfamily A. member 1 // 9p13-p12 /
8154785	CHMP5	NM_016410 // CHMP5 // chromatin modifying protein 5 // 9p13.3 // 51510 /// ENST0
8154856	UBE2R2	NM_017811 // UBE2R2 // ubiquitin-conjugating enzyme E2R 2 // 9p13.3 // 54926 ///
8154951	GLUL	NM_002065 // GLUL // glutamate-ammonia ligase (glutamine synthetase) // 1q31 //
8155192	GLIPR2	NM_022343 // GLIPR2 // GLI pathogenesis-related 2 // 9p13-p12 // 152007 /// ENST
8155547	LOC442421	NR_024496 // LOC442421 // hypothetical LOC442421 // 9q13 // 442421 /// ENST00000
8155883	OSTF1	NM_012383 // OSTF1 // osteoclast stimulating factor 1 // 9q13-q21.2 // 26578 ///
8156060	TLE4	NM_007005 // TLE4 // transducin-like enhancer of split 4 (E(sp1) homolog. Drosop
8156278	S1PR3	NM_005226 // S1PR3 // sphingosine-1-phosphate receptor 3 // 9q22.1-q22.2 // 1903
8156404	C9orf89	NM_032310 // C9orf89 // chromosome 9 open reading frame 89 // 9q22.31 // 84270 /
8156538	HIATL1	NM_032558 // HIATL1 // hippocampus abundant transcript-like 1 // 9q22.32 // 8464
8156688	TDRD7	NM_014290 // TDRD7 // tudor domain containing 7 // 9q22.33 // 23424 /// ENST0000
8156826	TGFBR1	NM_004612 // TGFBR1 // transforming growth factor. beta receptor 1 // 9q22 // 70
8156838	SEC61B	NM_006808 // SEC61B // Sec61 beta subunit // 9q22.32-q31.3 // 10952 /// ENST0000
8156861	STX17	NM_017919 // STX17 // syntaxin 17 // 9q31.1 // 55014 /// ENST00000259400 // STX1
8157021	NIPSNAP3A	NM_015469 // NIPSNAP3A // nipsnap homolog 3A (C. elegans) // 9q31.1 // 25934 ///
8157153	PALM2-AKAP2	NM_007203 // PALM2-AKAP2 // PALM2-AKAP2 readthrough transcript // 9q31-q33 // 44
8157253	SNX30	NM_001012994 // SNX30 // sorting nexin family member 30 // 9q32 // 401548 /// EN
8157264	SLC31A2	NM_001860 // SLC31A2 // solute carrier family 31 (copper transporters). member 2
8157270	SLC31A1	NM_001859 // SLC31A1 // solute carrier family 31 (copper transporters). member 1
8157446	ORM1	NM_000607 // ORM1 // orosomucoid 1 // 9q31-q32 // 5004 /// ENST00000259396 // OR
8157650	PTGS1	NM_000962 // PTGS1 // prostaglandin-endoperoxide synthase 1 (prostaglandin G/H s
8157761	NEK6	NM_001145001 // NEK6 // NIMA (never in mitosis gene a)-related kinase 6 // 9q33.
8157858	GAPVD1	NM_015635 // GAPVD1 // GTPase activating protein and VPS9 domains 1 // 9q33.3 //
8158112	CDK9	NM_001261 // CDK9 // cyclin-dependent kinase 9 // 9q34.1 // 1025 /// ENST0000037
8158147	SLC25A25	NM_052901 // SLC25A25 // solute carrier family 25 (mitochondrial carrier; phosph
8158240	TMSB4X	NM_021109 // TMSB4X // thymosin beta 4. X-linked // Xq21.3-q22 // 7114 /// NM_18
8158523	PPP2R4	NM_178001 // PPP2R4 // protein phosphatase 2A activator. regulatory subunit 4 //
8159127	RXRA	NM_002957 // RXRA // retinoid X receptor. alpha // 9q34.3 // 6256 /// ENST000003
8159476	TRAF2	NM_021138 // TRAF2 // TNF receptor-associated factor 2 // 9q34 // 7186 /// ENST0
8159642	TUBB2C	NM_006088 // TUBB2C // tubulin. beta 2C // 9q34 // 10383 /// ENST00000340384 //
8160346	PTPLAD2	NM_001010915 // PTPLAD2 // protein tyrosine phosphatase-like A domain containing
8160559	DDX58	NM_014314 // DDX58 // DEAD (Asp-Glu-Ala-Asp) box polypeptide 58 // 9p12 // 23586
8160581	TOPORS	NM_005802 // TOPORS // topoisomerase I binding. arginine/serine-rich // 9p21 //
8160647	BAG1	NM_004323 // BAG1 // BCL2-associated athanogene // 9p12 // 573 /// ENST000002241
8160718	PTENP1	NR_023917 // PTENP1 // phosphatase and tensin homolog pseudogene 1 // 9p21 // 11
8160981	KIAA1539	BC004406 // KIAA1539 // KIAA1539 // 9p13.3 // 80256 /// AB040972 // KIAA1539 //
8161056	TLN1	NM_006289 // TLN1 // talin 1 // 9p13 // 7094 /// ENST00000314888 // TLN1 // tali
8161747	ZFAND5	NM_001102420 // ZFAND5 // zinc finger. AN1-type domain 5 // 9q13-q21 // 7763 ///
8161988	UBQLN1	NM_013438 // UBQLN1 // ubiquilin 1 // 9q22|9q21.2-q21.3 // 29979 /// NM_053067 /
8162455	NINJ1	NM_004148 // NINJ1 // ninjurin 1 // 9q22 // 4814 /// ENST00000375446 // NINJ1 //
8162502	FBP1	NM_000507 // FBP1 // fructose-1.6-bisphosphatase 1 // 9q22.3 // 2203 /// NM_0011
8162531	NA	---
8162729	TRIM14	NM_014788 // TRIM14 // tripartite motif-containing 14 // 9q22.33 // 9830 /// NM_
8163185	TXN	NM_003329 // TXN // thioredoxin // 9q31 // 7295 /// ENST00000374517 // TXN // th
8163383	SUSD1	NM_022486 // SUSD1 // sushi domain containing 1 // 9q31.3-q33.1 // 64420 /// ENS
8163452	FKBP15	NM_015258 // FKBP15 // FK506 binding protein 15. 133kDa // 9q32 // 23307 /// ENS
8163775	MEGF9	NM_001080497 // MEGF9 // multiple EGF-like-domains 9 // 9q32-q33.3 // 1955 /// A
8163807	PHF19	NM_015651 // PHF19 // PHD finger protein 19 // 9q33.2 // 26147 /// NM_001009936
8164217	FAM129B	NM_022833 // FAM129B // family with sequence similarity 129. member B // 9q33.3-
8164269	ENG	NM_000118 // ENG // endoglin // 9q33-q34.1 // 2022 /// NM_001114753 // ENG // en
8164580	PTGES	NM_004878 // PTGES // prostaglandin E synthase // 9q34.3 // 9536 /// ENST0000034
8164587	TOR1A	NM_000113 // TOR1A // torsin family 1. member A (torsin A) // 9q34 // 1861 /// E
8164607	FNBP1	NM_015033 // FNBP1 // formin binding protein 1 // 9q34 // 23048 /// ENST00000446
8164644	FAM78A	NM_033387 // FAM78A // family with sequence similarity 78. member A // 9q34 // 2
8164833	GBGT1	NM_021996 // GBGT1 // globoside alpha-1.3-N-acetylgalactosaminyltransferase 1 //
8164862	SURF6	NM_006753 // SURF6 // surfeit 6 // 9q34.2 // 6838 /// ENST00000372022 // SURF6 /
8164918	SLC2A6	NM_017585 // SLC2A6 // solute carrier family 2 (facilitated glucose transporter)
8164967	VAV2	NM_001134398 // VAV2 // vav 2 guanine nucleotide exchange factor // 9q34.1 // 74
8165011	FCN1	NM_002003 // FCN1 // ficolin (collagen/fibrinogen domain containing) 1 // 9q34 /
8165046	CAMSAP1	NM_015447 // CAMSAP1 // calmodulin regulated spectrin-associated protein 1 // 9q
8165217	NOTCH1	NM_017617 // NOTCH1 // Notch homolog 1. translocation-associated (Drosophila) //
8165642	TMEM203	NM_053045 // TMEM203 // transmembrane protein 203 // 9q34.3 // 94107 /// ENST000
8165735	CSF2RA	NM_001161531 // CSF2RA // colony stimulating factor 2 receptor. alpha. low-affin
8166059	TLR7	NM_016562 // TLR7 // toll-like receptor 7 // Xp22.3 // 51284 /// ENST00000380659
8166402	SMS	NM_004595 // SMS // spermine synthase // Xp22.1 // 6611 /// ENST00000404933 // S
8166469	SAT1	NR_027783 // SAT1 // spermidine/spermine N1-acetyltransferase 1 // Xp22.1 // 630
8166632	GK	NM_001128127 // GK // glycerol kinase // Xp21.3 // 2710 /// NM_203391 // GK // g
8166730	CYBB	NM_000397 // CYBB // cytochrome b-245. beta polypeptide // Xp21.1 // 1536 /// EN
8166797	MID1IP1	NM_021242 // MID1IP1 // MID1 interacting protein 1 (gastrulation specific G12 ho
8167334	WAS	NM_000377 // WAS // Wiskott-Aldrich syndrome (eczema-thrombocytopenia) // Xp11.4
8167443	MAGIX	NM_024859 // MAGIX // MAGI family member. X-linked // Xp11.23 // 79917 /// NM_00
8167449	PLP2	NM_002668 // PLP2 // proteolipid protein 2 (colonic epithelium-enriched) // Xp11
8167749	FAM156A	NM_014138 // FAM156A // family with sequence similarity 156. member A // Xp11.22
8167930	FAAH2	NM_174912 // FAAH2 // fatty acid amide hydrolase 2 // Xp11.21 // 158584 /// ENST
8167971	NA	---
8168028	STARD8	NM_001142503 // STARD8 // StAR-related lipid transfer (START) domain containing
8168472	ATP7A	NM_000052 // ATP7A // ATPase. Cu++ transporting. alpha polypeptide // Xq13.2-q13
8169352	NXT2	NM_018698 // NXT2 // nuclear transport factor 2-like export factor 2 // Xq23 //
8169365	TMEM164	NM_032227 // TMEM164 // transmembrane protein 164 // Xq22.3 // 84187 /// ENST000
8169580	IL13RA1	NM_001560 // IL13RA1 // interleukin 13 receptor. alpha 1 // Xq24 // 3597 /// ENS
8169640	SLC25A5	NM_001152 // SLC25A5 // solute carrier family 25 (mitochondrial carrier; adenine
8169701	MCTS1	NM_014060 // MCTS1 // malignant T cell amplified sequence 1 // Xq22-q24 // 28985
8169859	SASH3	NM_018990 // SASH3 // SAM and SH3 domain containing 3 // Xq26 // 54440 /// ENST0
8169949	RP6-213H19.1	NM_016542 // RP6-213H19.1 // serine/threonine protein kinase MST4 // Xq26.2 // 5
8170097	SLC9A6	NM_001042537 // SLC9A6 // solute carrier family 9 (sodium/hydrogen exchanger). m
8170187	CD40LG	NM_000074 // CD40LG // CD40 ligand // Xq26 // 959 /// ENST00000370629 // CD40LG
8170420	MAMLD1	NM_005491 // MAMLD1 // mastermind-like domain containing 1 // Xq28 // 10046 ///
8171105	CRLF2	NM_022148 // CRLF2 // cytokine receptor-like factor 2 // Xp22.3; Yp11.3 // 64109
8171119	ASMTL	NM_004192 // ASMTL // acetylserotonin O-methyltransferase-like // Xp22.3; Yp11.3
8171481	AP1S2	NM_003916 // AP1S2 // adaptor-related protein complex 1. sigma 2 subunit // Xp22
8171837	KLHL15	NM_030624 // KLHL15 // kelch-like 15 (Drosophila) // Xp22.1-p21 // 80311 /// ENS
8171896	CXorf21	BC020611 // CXorf21 // chromosome X open reading frame 21 // Xp21.2 // 80231 ///
8172333	CFP	NM_002621 // CFP // complement factor properdin // Xp11.3-p11.23 // 5199 /// NM_
8172460	SLC35A2	NM_001042498 // SLC35A2 // solute carrier family 35 (UDP-galactose transporter).
8172471	PIM2	NM_006875 // PIM2 // pim-2 oncogene // Xp11.23 // 11040 /// ENST00000376509 // P
8172520	TFE3	NM_006521 // TFE3 // transcription factor binding to IGHM enhancer 3 // Xp11.22
8173232	FAM123B	NM_152424 // FAM123B // family with sequence similarity 123B // Xq11.2 // 139285
8173613	RLIM	NM_016120 // RLIM // ring finger protein. LIM domain interacting // Xq13-q21 //
8173729	PGAM4	NM_001029891 // PGAM4 // phosphoglycerate mutase family member 4 // Xq13 // 4415
8174076	GLA	NM_000169 // GLA // galactosidase. alpha // Xq22 // 2717 /// ENST00000218516 //
8174103	GK	NM_001128127 // GK // glycerol kinase // Xp21.3 // 2710 /// NM_000167 // GK // g
8174361	TSC22D3	NM_198057 // TSC22D3 // TSC22 domain family. member 3 // Xq22.3 // 1831 /// NM_0
8174636	SUMO2	NM_006937 // SUMO2 // SMT3 suppressor of mif two 3 homolog 2 (S. cerevisiae) //
8175155	FRMD7	NM_194277 // FRMD7 // FERM domain containing 7 // Xq26-q27 // 90167 /// ENST0000
8175169	RAP2C	NM_021183 // RAP2C // RAP2C. member of RAS oncogene family // Xq25 // 57826 ///
8176076	DNASE1L1	NM_001009932 // DNASE1L1 // deoxyribonuclease I-like 1 // Xq28 // 1774 /// NM_00
8176098	UBL4A	NM_014235 // UBL4A // ubiquitin-like 4A // Xq28 // 8266 /// ENST00000369660 // U
8176133	G6PD	NM_000402 // G6PD // glucose-6-phosphate dehydrogenase // Xq28 // 2539 /// NM_00
8176234	CLIC2	NM_001289 // CLIC2 // chloride intracellular channel 2 // Xq28 // 1193 /// ENST0
8176255	TMLHE	NM_018196 // TMLHE // trimethyllysine hydroxylase. epsilon // Xq28 // 55217 ///
8176282	PGAM4	NM_001029891 // PGAM4 // phosphoglycerate mutase family member 4 // Xq13 // 4415
8176306	CSF2RA	NM_001161531 // CSF2RA // colony stimulating factor 2 receptor. alpha. low-affin
8177011	ASMTL	NM_004192 // ASMTL // acetylserotonin O-methyltransferase-like // Xp22.3; Yp11.3
8177527	NA	NA
8177797	ABCF1	NM_001025091 // ABCF1 // ATP-binding cassette. sub-family F (GCN20). member 1 //
8177858	TUBB	NM_178014 // TUBB // tubulin. beta // 6p21.33 // 203068 /// ENST00000383564 // T
8177955	MICB	NM_005931 // MICB // MHC class I polypeptide-related sequence B // 6p21.3 // 427
8177976	LTA	NM_000595 // LTA // lymphotoxin alpha (TNF superfamily. member 1) // 6p21.3 // 4
8177988	LST1	NM_007161 // LST1 // leukocyte specific transcript 1 // 6p21.3 // 7940 /// NM_20
8178086	HSPA1B	NM_005346 // HSPA1B // heat shock 70kDa protein 1B // 6p21.3 // 3304 /// NM_0053
8178188	RNF5P1	NR_003129 // RNF5P1 // ring finger protein 5 pseudogene 1 // 8p11.22 // 286140 /
8178322	SUMO2	NM_006937 // SUMO2 // SMT3 suppressor of mif two 3 homolog 2 (S. cerevisiae) //
8178358	PPP1R10	NM_002714 // PPP1R10 // protein phosphatase 1. regulatory (inhibitor) subunit 10
8178435	IER3	NM_003897 // IER3 // immediate early response 3 // 6p21.3 // 8870 /// ENST000002
8178561	BAT5	NM_021160 // BAT5 // HLA-B associated transcript 5 // 6p21.3 // 7920 /// ENST000
8178833	HLA-DOB	NM_002120 // HLA-DOB // major histocompatibility complex. class II. DO beta // 6
8178855	PSMB8	NM_004159 // PSMB8 // proteasome (prosome. macropain) subunit. beta type. 8 (lar
8178867	TAP1	NM_000593 // TAP1 // transporter 1. ATP-binding cassette. sub-family B (MDR/TAP)
8178884	HLA-DMA	NM_006120 // HLA-DMA // major histocompatibility complex. class II. DM alpha //
8179112	ABCF1	NM_001025091 // ABCF1 // ATP-binding cassette. sub-family F (GCN20). member 1 //
8179174	TUBB	NM_178014 // TUBB // tubulin. beta // 6p21.33 // 203068 /// ENST00000383564 // T
8179238	MICA	NM_000247 // MICA // MHC class I polypeptide-related sequence A // 6p21.33 // 42
8179258	LTA	NM_001159740 // LTA // lymphotoxin alpha (TNF superfamily. member 1) // 6p21.3 /
8179268	LST1	NM_007161 // LST1 // leukocyte specific transcript 1 // 6p21.3 // 7940 /// NM_20
8179322	HSPA1A	NM_005345 // HSPA1A // heat shock 70kDa protein 1A // 6p21.3 // 3303 /// BC00245
8179324	HSPA1B	NM_005346 // HSPA1B // heat shock 70kDa protein 1B // 6p21.3 // 3304 /// NM_0053
8179638	TRIM26	NM_003449 // TRIM26 // tripartite motif-containing 26 // 6p21.3 // 7726 /// ENST
8179664	PPP1R10	NM_002714 // PPP1R10 // protein phosphatase 1. regulatory (inhibitor) subunit 10
8179704	IER3	NM_003897 // IER3 // immediate early response 3 // 6p21.3 // 8870 /// ENST000002
8180049	PSMB8	NM_004159 // PSMB8 // proteasome (prosome. macropain) subunit. beta type. 8 (lar
8180061	TAP1	NM_000593 // TAP1 // transporter 1. ATP-binding cassette. sub-family B (MDR/TAP)
8180086	HLA-DMA	NM_006120 // HLA-DMA // major histocompatibility complex. class II. DM alpha //
